# Supplementary material
Source: PubMed Central journal article supplement (PMC6348442)

# SUPPORTING INFORMATION - Potent metabolic sialylation inhibitors based on C-5 modified fluorinated sialic acids

Torben Heise<sup>1,‡</sup>, Johan F.A. Pijnenborg<sup>1,‡</sup>, Christian Büll<sup>2</sup>, Niek van Hilten<sup>3</sup>, Esther D. Kers-Rebel<sup>2</sup>, Natasja Balneger<sup>2</sup>, Hidde Elferink<sup>1</sup>, Gosse J. Adema<sup>2,\*</sup>, Thomas J. Boltje<sup>1,\*</sup>

<sup>1</sup>Dr. Thomas J. Boltje, Cluster of Molecular Chemistry, Institute for Molecules and Materials, Radboud University Nijmegen, The Netherlands. E-mail: t.boltje@science.ru.nl

<sup>2</sup>Prof. Dr. Gosse J. Adema, Radiotherapy & Oncolmmunology Laboratory, Department of Radiation Oncology, Radboudumc, Nijmegen, The Netherlands. E-mail: gosse.adema@radboudumc.nl

<sup>3</sup>Computational Discovery and Design Group, Centre for Molecular and Biomolecular Informatics, Radboud University Nijmegen, The Netherlands.

‡These authors contributed equally. \*Lead contacts.

|                                                                                                                                              |        |
|----------------------------------------------------------------------------------------------------------------------------------------------|--------|
| <b>Supplementary Methods</b>                                                                                                                 | S2-3   |
| <b>Supporting figure 1</b><br><i>Effect of 1, 2, 4-12 on cell metabolic activity/viability.</i>                                              | S4     |
| <b>Supporting figure 2</b><br><i>Effect of 1, 2, 4-12 on total cell surface glycosylation.</i>                                               | S5     |
| <b>Supporting figure 3</b><br><i>Recovery of sialylation after treatment with 25.6 <math>\mu</math>M fluorinated sialic acid mimetics.</i>   | S6     |
| <b>Supporting table 1</b><br><i>EC<sub>50</sub> values in <math>\mu</math>M for inhibition of <math>\alpha</math>2,6-linked sialic acid.</i> | S7     |
| <b>General synthetic procedures and abbreviations</b>                                                                                        | S8     |
| <b>Synthetic experimental</b>                                                                                                                | S9-21  |
| <b>References and notes</b>                                                                                                                  | S22    |
| <b>NMR-spectra</b>                                                                                                                           | S23-43 |

## Supplementary Methods

### *Cell culture*

B16-F10 mouse melanoma cells (ATCC, CRL-6475) were cultured in MEM medium (Gibco) containing 5 % FBS (GE Healthcare), 1 % MEM non-essential amino acids (Gibco), 0.15 % sodium bicarbonate (Gibco), 1 mM sodium pyruvate (Gibco), 1.5 % MEM vitamins (Gibco) and 1x antibiotic-antimycotic solution (Gibco). 9464D mouse neuroblastoma cells (kindly provided by Dr. Orentas, NIH, Bethesda) were cultured in DMEM Glutamax (Gibco) with 10 % FBS, 1 % non-essential amino acids, 50  $\mu$ M 2-mercaptoethanol (Sigma-Aldrich) and 1x antibiotic-antimycotic solution. EL4 mouse T lymphocytes (ATCC, TIB-39) were cultured in IMDM medium (Gibco) containing 5 % FBS, 50  $\mu$ M 2-mercaptoethanol and 1x antibiotic-antimycotic solution. Human THP-1 monocytic cells (ATCC, TIB-202) were cultured in RPMI 1640 medium (Gibco) supplemented with 10% FBS, 2 mM glutamine (Lonza) and 1x antibiotic-antimycotic solution. HEK293 human embryonic kidney cells (ATCC, CRL-1573) and HeLa human epithelial cells (ATCC, CRM-CCL-2) were cultured in DMEM Glutamax supplemented with 10 % FBS, 1 % non-essential amino acids and 1x antibiotic-antimycotic solution. The cell lines were initially grown and multiple aliquots were cryopreserved. The cells were used within 3 months after resuscitation and regularly tested for mycoplasma using a mycoplasma detection kit (Lonza). All cells were cultured in a humidified CO<sub>2</sub> incubator at 37°C. To determine the effective concentration of the sialic acid mimetics, the different cell lines were incubated for 3 days with increasing concentrations of the mimetics or equivalent concentrations of DMSO followed by lectin staining. Additionally, glycosylation of B16-F10 cells incubated for 3 days with 102.4  $\mu$ M C-5-modified fluorinated sialic acids or DMSO control was assessed with different lectins. To determine the recovery speed of cell surface sialylation after inhibitor treatment, B16-F10 cells were treated for 3 days with 25.6  $\mu$ M or 51.2  $\mu$ M mimetics or DMSO control, washed, reseeded and analyzed daily by lectin staining for a period of 6 days.

### *Lectin staining and flow cytometry*

Cells were harvested and stained with biotinylated lectins in 1x carbo-free blocking buffer (Vector Laboratories Inc.) containing 1 mM CaCl and 1 mM MgCl for 45-60 minutes at 4 °C. The lectins were obtained from Vector Laboratories Inc. and used at the following concentration; MALII (5  $\mu$ g/ml), SNA-I (1  $\mu$ g/ml), WGA (1  $\mu$ g/ml), SJA (1  $\mu$ g/ml), LCA (1  $\mu$ g/ml), GSL-I (1  $\mu$ g/ml), PHA-L (1  $\mu$ g/ml), PSA (1  $\mu$ g/ml), AAL (5  $\mu$ g/ml) and PNA (5  $\mu$ g/ml). Next cells were washed with PBA (1x PBS, 1 % BSA, and 0.02 % sodium azide) and stained with streptavidin-PE (eBioscience) for 20 minutes at 4 °C. Cells were washed, collected in PBA and analyzed using a CyAn flow cytometer (Beckman Coulter). Percentage lectin binding was calculated by normalizing the mean fluorescence intensity to control cells

### *MTT assay*

B16-F10 cells were cultured for 3 days in the presence of 0-204.8  $\mu\text{M}$  **1**, **2**, **4-12** or DMSO control and subjected to an MTT assay. Cells were washed and incubated in medium containing 0.5 mg/ml thiazolyl blue tetrazolium bromide (MTT, Sigma-Aldrich) for 30 minutes at 37 °C. Next, the cells were washed with 1x PBS and lysed in solubilizing solution (90 % isopropanol, 0.25 % SDS, 0.04 M HCL). Reduction of tetrazolium dye to purple formazan by the cells was quantified at 595 nm wavelength using a microplate absorbance reader (BioRad).

### *In silico modeling*

Crystal structures of human ST6Gall (4JS2<sup>1</sup>), human ST8SialII (5BO9<sup>2</sup>) and murine CMAS (1QWJ<sup>3</sup>) were retrieved from the Protein Data Bank (PDB). Sialyltransferase crystal structures were superposed using the protein align function in MOE 2013.08<sup>4</sup> at default settings. In the CMAS structure, the binding pocket of domain D was used for modeling; water molecules were retained. The A-B dimer was neglected. The highest ranked alternative rotamer (suggested by MOE) for Ser120(D) was used to better accommodate the molecular environment and ligand interactions. Hydrogens were added using MOE's protonate 3D function at default settings and OH-groups were optimally oriented prior to energy minimizations. All energy minimizations were conducted using the AMBER12:EHT force field<sup>5</sup> in MOE, leaving the ligand atoms and all receptor and solvent atoms within 8Å free to move. Images were generated with UCSF Chimera 1.13<sup>6</sup>.

### *CMP-sialic acid quantification*

B16-F10 cells were incubated for 1, 2, 4, 8 or 24 hrs with 51.2  $\mu\text{M}$  fluorinated sialic acid analogues or DMSO control. The cells were washed thoroughly with ammonium carbonate buffer (pH 7.4) and subsequently snap frozen in liquid nitrogen. For extraction, the wells were incubated two times for 3 minutes with cold extraction buffer (40% acetonitrile, 40% methanol, 20% water). The samples were centrifuged for 3 minutes at 13.000 rpm and vacuum dried. Next, the cell extracts were reconstituted in 10 mM triethylammonium acetate followed by analysis using reverse-phase ion pairing chromatography (Agilent Technologies 1290 Infinity) coupled to a triple quadrupole mass spectrometer operating in negative ion mode (Agilent Technologies 6490 Triple Quad LC/MS) by GlycoMScan B.V., Oss, The Netherlands (collaboration Dr. M. Van Scherpenzeel). For analysis of synthetic modified sugars, the MRM transitions were adapted based on fragmentation knowledge of the non-modified, endogenous compound.

## Supporting figures and tables

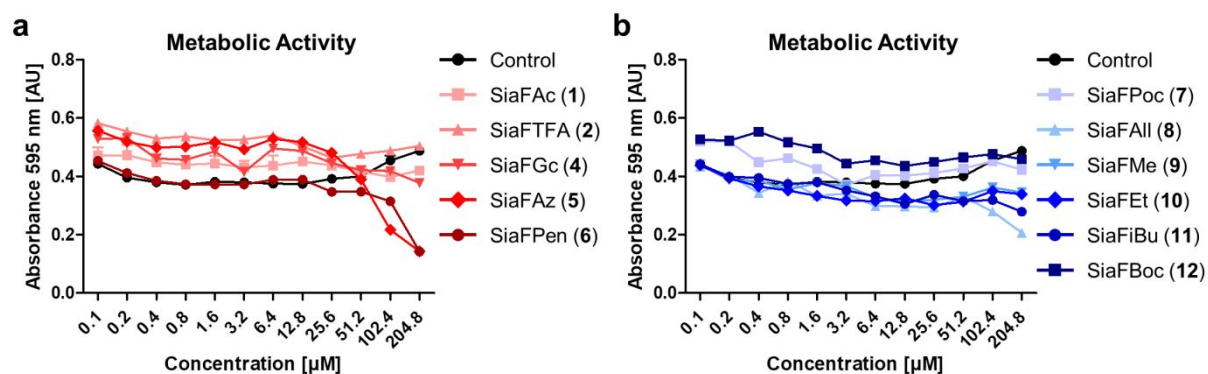

**Figure S1:** Effect of **1, 2, 4-12** on cell metabolic activity/viability. B16-F10 cells were cultured for three days with increasing concentrations of fluorine sialic acids or DMSO and subjected to an MTT assay. Representative graphs show absorbance at 595 nm for cells treated with amide (**a**) or carbamate (**b**) fluorine sialic acids.

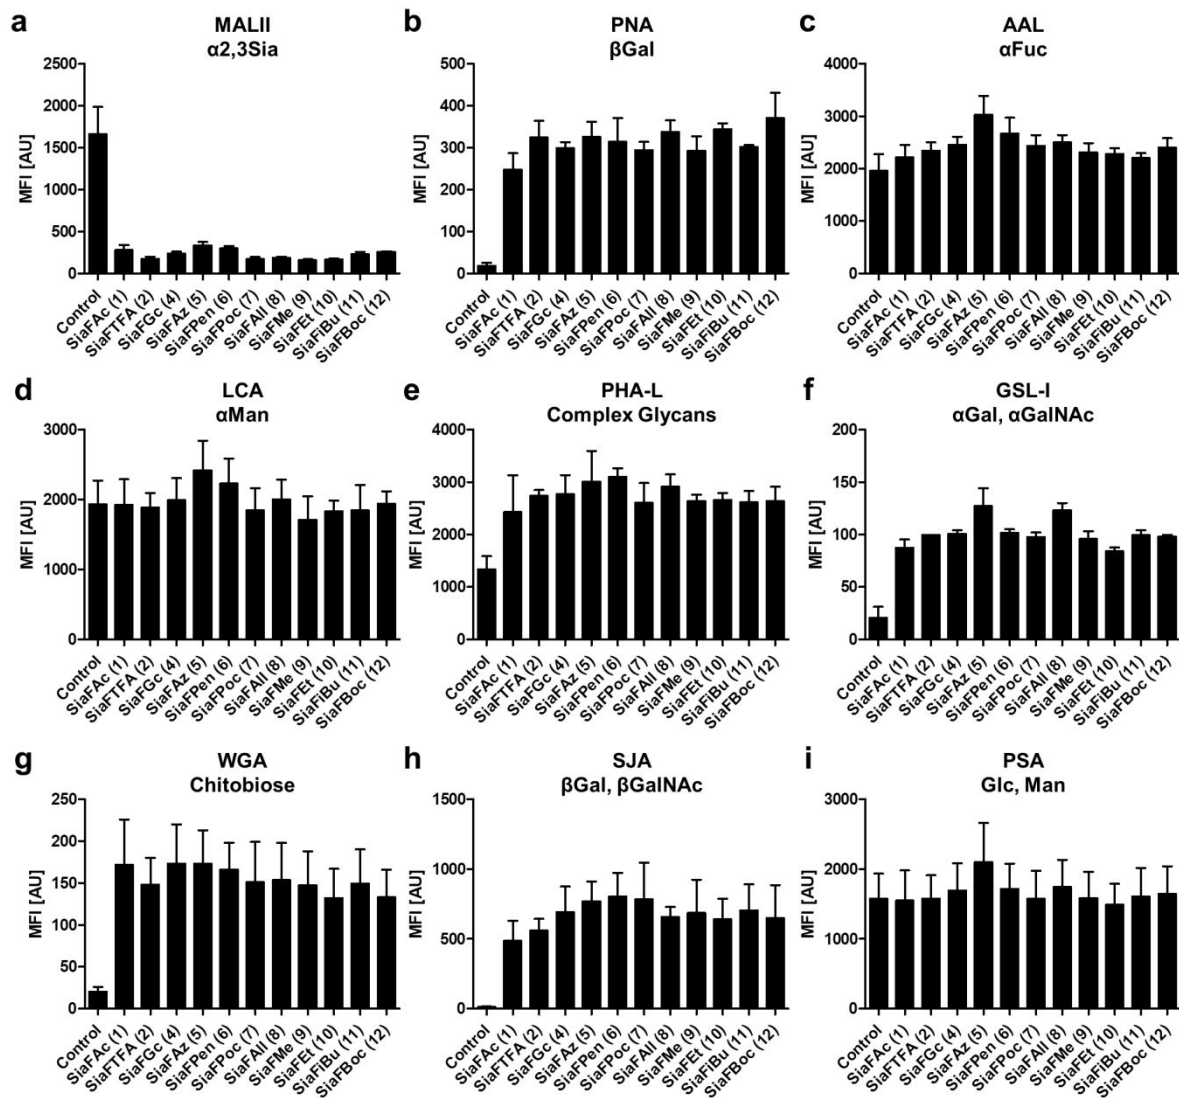

**Figure S2:** Effect of **1, 2, 4-12** on total cell surface glycosylation. B16-F10 cells treated for three days with 102.4  $\mu$ M fluorine sialic acids or DMSO control were stained with a panel of biotinylated lectins and streptavidin-PE. Lectin binding was determined in two independent experiments by flow cytometry and is presented as mean fluorescence intensity (MFI)  $\pm$  SEM. Bar diagrams show binding of MALII (**a**), PNA (**b**), AAL (**c**), LCA (**d**), PHA-L (**e**), GSL-I (**f**), WGA (**g**), SJA (**h**) and PSA (**i**).

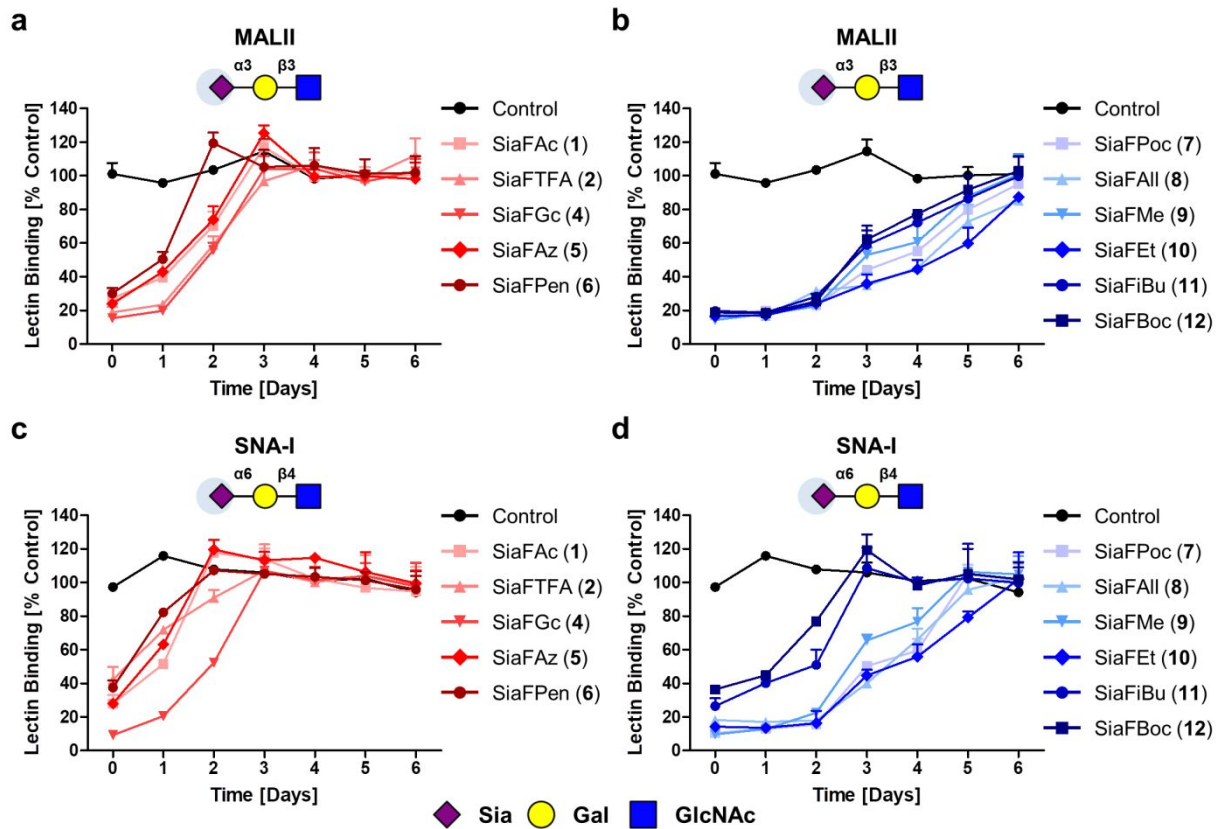

**Figure S3:** Recovery of sialylation after treatment with 25.6  $\mu\text{M}$  fluorinated sialic acid mimetics. **a-d)** B16-F10 cells were treated with 25.6  $\mu\text{M}$  fluorine sialic acids for three days, thoroughly washed and recovery of sialylation was followed in time by flow cytometry using MALII and SNA-I staining. Data of three independent experiments are presented as mean percentage lectin binding  $\pm$  SEM normalized to control and show MALII and SNA-I binding after treatment with amide (**a, c**) and carbamate (**b, d**) fluorine sialic acids.

| Group             | SiaFR    | B16-F10      | rIP | THP-1        | HEK293        | HeLa         | 9464D        | EL4                     |
|-------------------|----------|--------------|-----|--------------|---------------|--------------|--------------|-------------------------|
| <b>Amides</b>     | Ac (1)   | 32.80 ± 3.08 |     | 10.87 ± 2.47 | 36.69 ± 3.59  | 34.50 ± 2.18 | > 102.4      | > 102.4                 |
|                   | TFA (2)  | 33.33 ± 2.63 | 1   | 7.19 ± 3.60  | 41.36 ± 10.44 | 33.38 ± 4.38 | > 102.4      | > 102.4                 |
|                   | ClAc (3) | ND           |     | ND           | ND            | ND           | ND           | ND                      |
|                   | Gc (4)   | 11.78 ± 2.27 | 3   | 5.94 ± 2.18  | 54.06 ± 15.34 | 12.50 ± 2.52 | > 102.4      | > 102.4                 |
|                   | Az (5)   | 32.82 ± 3.55 | 1   | 13.23 ± 3.02 | 47.21 ± 2.89  | 42.19 ± 8.42 | > 102.4      | > 102.4                 |
|                   | Pen (6)  | 52.49 ± 4.31 | 1   | 12.58 ± 3.51 | 44.71 ± 4.33  | 51.23 ± 6.06 | > 102.4      | > 102.4                 |
| <b>Carbamates</b> | Poc (7)  | 2.59 ± 0.07  | 13  | 0.44 ± 1.59  | 5.42 ± 1.40   | 1.37 ± 0.81  | 40.19 ± 6.56 | 51.65 ± 2.62            |
|                   | All (8)  | 2.87 ± 0.80  | 11  | 0.38 ± 1.67  | 1.68 ± 3.20   | 2.04 ± 1.40  | 9.64 ± 3.93  | 50.9 ± 6.44             |
|                   | Me (9)   | 7.54 ± 1.34  | 4   | 2.65 ± 1.60  | 4.77 ± 2.80   | 5.23 ± 1.88  | 29.60 ± 4.67 | 52.68 ± 5.45            |
|                   | Et (10)  | 3.87 ± 1.14  | 8   | 0.37 ± 1.76  | 1.57 ± 4.23   | 1.67 ± 1.31  | 28.13 ± 5.51 | 50.58 ± 8.84            |
|                   | iBu (11) | 15.07 ± 3.70 | 2   | 0.62 ± 1.77  | 9.61 ± 4.83   | 4.32 ± 1.82  | 36.15 ± 6.40 | 51.07 ± 8.97            |
|                   | Boc (12) | 8.21 ± 0.67  | 4   | 1.72 ± 2.30  | 28.03 ± 2.57  | 20.55 ± 1.95 | > 102.4      | 50.31 ± 3.99            |
|                   | Cbz (13) | ND           |     |              |               |              |              | EC <sub>50</sub> <5 μM  |
|                   | PBn (14) | ND           |     |              |               |              |              | EC <sub>50</sub> <20 μM |
|                   | nBu (15) | 7.91 ± 1.95  | 4   |              |               |              |              | EC <sub>50</sub> <50 μM |
|                   | Mox (16) | 32.38 ± 1.38 | 1   |              |               |              |              |                         |
|                   | Tro (17) | 7.85 ± 2.07  | 4   |              |               |              |              |                         |
|                   | FEt (18) | 2.05 ± 1.29  | 16  |              |               |              |              |                         |

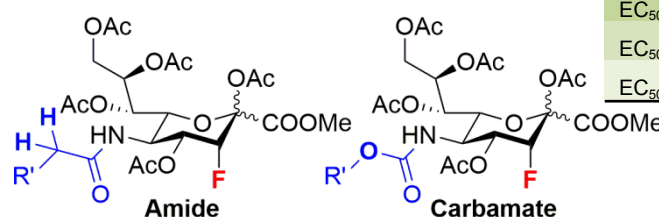

**Table S1:** EC<sub>50</sub> values in μM for inhibition of α2,6-linked sialic acid. B16-F10 cells were treated with 0.1-205.8 μM, and THP-1, HEK293, HeLa, 9464D and EL4 cells with 0.1-102.4 μM amide or carbamate fluorinated sialic acids or DMSO vehicle control. After three days the cells were stained with biotinylated lectins that recognize α2,6-linked (SNA-I) sialic acids, and streptavidin-PE. Binding of the lectins was determined by flow cytometry, as mean percentage lectin binding ± SEM normalized to the control (n=3). The relative inhibitory potency (rIP) was calculated for the B16-F10 cell line by dividing the EC<sub>50</sub> of SiaFAc (1) by the EC<sub>50</sub> of the compound of interest.

## General synthetic procedures and abbreviations

**General synthetic procedures**  $^1\text{H}$  and  $^{13}\text{C}$  NMR spectra were recorded on a Varian Inova 400 MHz or Bruker Avance III 500 MHz spectrometer. Chemical shifts are reported in parts per million (ppm) relative to tetramethylsilane (TMS) as the internal standard. NMR data is presented as follows: Chemical shift, multiplicity (s = singlet, bs = broad singlet, d = doublet, t = triplet, dd = doublet of doublet, dt = doublet of triplet, m = multiplet and/or multiple resonances), integration, coupling constant in Hertz (Hz). All NMR signals were assigned on the basis of  $^1\text{H}$ ,  $^{13}\text{C}$ ,  $^{19}\text{F}$  NMR, COSY and HSQC experiments. Mass spectra were recorded on a JEOL JMS-T100CS AccuTOF mass spectrometer. Automatic column chromatography was performed on Biotage Isolera Spektra One, using SNAP cartridges 10-50g filled with normal silica (Biotage, 30-100  $\mu\text{m}$ , 60  $\text{\AA}$ ) or water resistant iatro beads. Microwave reactions were performed on a Biotage Initiator 4.1.3. TLC analysis was conducted on TLC Silicagel, 60, F254, Merck, with detection by UV absorption (254 nm) where applicable, and by spraying with 20% sulfuric acid in methanol followed by charring at  $\sim 150^\circ\text{C}$  or by spraying with a solution of  $(\text{NH}_4)_6\text{Mo}_7\text{O}_{24}\cdot\text{H}_2\text{O}$  (25 g l $^{-1}$ ) in 10% sulfuric acid in methanol followed by charring at  $\sim 300^\circ\text{C}$ . DCM, ACN and Tol were freshly distilled. All reactions were carried out under an argon atmosphere.

### Commonly used abbreviations

|                                    |                                    |        |                                   |
|------------------------------------|------------------------------------|--------|-----------------------------------|
| Ac <sub>2</sub> O                  | Acetic anhydride                   | n-Bu   | n-Butyl                           |
| Acet                               | Acetone                            | Poc    | Propargylcarboxycarbonyl          |
| ACN                                | Acetonitrile                       | Pyr    | Pyridine                          |
| AcOH                               | Acetic acid                        | ROSu   | Hydroxysuccinimide ester          |
| Alloc                              | Allyloxycarbonyl                   | SAda   | Adamantyl-thiol                   |
| Az                                 | Azidoacetic acid                   | STol   | 4-methylthiophenol                |
| BF <sub>3</sub> •Et <sub>2</sub> O | Boron trifluoride etherate         | TBTA   | Tris(benzyltriazolyl methyl)amine |
| BoC-2O                             | Di- <i>tert</i> -butyl dicarbonate | tBu    | Tert-butyl                        |
| Br <sub>2</sub>                    | Bromine                            | TEA    | Triethylamine                     |
| Cbz                                | Carboxybenzyl                      | TFA    | Trifluoroacetic acid              |
| CD <sub>3</sub> OD                 | Deuterated methanol                | TFAA   | Trifluoroacetic acid anhydride    |
| CDCl <sub>3</sub>                  | Deuterated chloroform              | TfOH   | Trifluoroacetic acid              |
| D <sub>2</sub> O                   | Deuterium oxide                    | acid   | Trifluoroacetic acid              |
| DCM                                | Dichloromethane                    | TMSOTf | Trimethylsilyl trifluoroacetate   |
| DMAP                               | Dimethylaminopyridine              | Tol    | Toluene                           |
| DMF                                | <i>N,N</i> -Dimethylformamide      | Troc   | 2,2,2 trichloroethoxycarbon       |
| EtOAc                              | Ethyl acetate                      |        |                                   |
| Hept                               | Heptane                            |        |                                   |
| iBu                                | Iso-butyl                          |        |                                   |



## Synthetic experimental

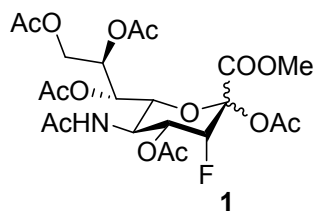

**1**      **Methyl 5-(acetamido)-2,4,7,8,9-penta-O-acetyl-3,5-dideoxy-3-fluoro-D-glycero-β-galacto-non-2-ulopyranosonate (1).** Synthesis was performed as described previously the data is identical to the data previously reported.<sup>7</sup> **TLC:** (Acet:DCM, 30:70 v/v)  $R_f = 0.40$ . **HRMS** ( $m/z$ ):  $[M+Na]^+$  calcd for  $C_{20}H_{28}FNO_{13}$ , 532.1443; found, 532.1442. The crude fluorinated alcohol was dissolved in Pyr (14.5 ml) and  $Ac_2O$  (7.3 ml), stirred for 16 hours at r.t. and was evaporated *in vacuo*. The resulting solid dissolved in EtOAc and sat. aq.  $NaHCO_3$ . The organic phase was separated and the solvent evaporated *in vacuo* and purified on silica flash-column chromatography (0 → 30% ACE in DCM) affording **1** (1.46 g, 2.54 mmol, 80% yield *two steps*) as a slightly yellow foam. **TLC:** (Acet:DCM, 30:70 v/v)  $R_f = 0.55$ . **<sup>1</sup>H-NMR** (500 MHz,  $CD_3OD$ , major anOCH<sub>3</sub>r)  $\delta$  5.58 (d,  $J = 8.9$  Hz, 1H, NH), 5.46 (dd,  $J = 27.9, 10.7$  Hz, 1H, H-4), 5.29 (dd,  $J = 5.0, 1.8$  Hz, 1H, H-7), 5.05 (ddd,  $J = 6.7, 5.2, 2.5$  Hz, 1H, H-8), 4.87 (dd,  $J = 49.1, 2.5$  Hz, 1H, H-3), 4.51 (dd,  $J = 12.5, 2.5$  Hz, 1H, H-9<sub>a</sub>), 4.21 – 4.10 (m, 3H, H-9<sub>b</sub>; H-5; H-6), 3.77 (s, 3H, OCH<sub>3</sub>), 2.12 – 2.09 (m, 6H, 2xCH<sub>3</sub>, OAc), 2.04 (s, 3H, CH<sub>3</sub>, OAc), 1.98 (s, 3H, CH<sub>3</sub>, OAc), 1.97 (s, 3H, CH<sub>3</sub>, OAc), 1.85 (s, 3H, CH<sub>3</sub>, NHAc).; **<sup>13</sup>C-NMR** (126 MHz,  $CD_3OD$ )  $\delta$  170.58 (CO, Ac), 170.56 (CO, Ac), 170.50 (CO, Ac), 170.34 (CO, Ac), 167.11 (C-1), 95.16 (d,  $J = 28.8$  Hz, C-2), 86.95 (d,  $J = 185.3$  Hz, C-3), 71.91 (C-6), 71.37 (C-8), 68.40 (d,  $J = 17.2$  Hz, C-4), 67.93 (C-7), 62.09 (C-9), 53.49 (OCH<sub>3</sub>), 45.53 (C-5), 29.27 (CH<sub>3</sub>, Ac), 20.88 (CH<sub>3</sub>, Ac), 20.79 (CH<sub>3</sub>, Ac), 20.74 (CH<sub>3</sub>, Ac), 20.65 (CH<sub>3</sub>, Ac), 20.51 (CH<sub>3</sub>, Ac); **HRMS** ( $m/z$ ):  $[M+Na]^+$  calcd for  $C_{22}H_{30}FNO_{14}$ , 574.1548; found, 574.1548.

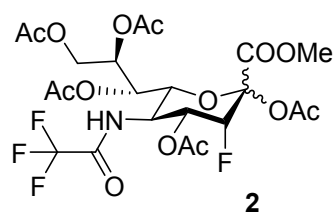

**2**      **Methyl 5-(trifluoroacetamido)-2,4,7,8,9-penta-O-acetyl-3,5-dideoxy-3-fluoro-D-glycero-β-galacto-non-2-ulopyranosonate (2).** TFA protected Sialic acid **2** was a common side product after TFA deprotection. Further investigation discovered that TFA, if not removed carefully, forms a mixed anhydride with chloroformates resulting in a quantitative coupling of TFA to the relatively unreactive amine. Later deprotection reactions were therefore done with TFOH which avoided this problem. Boc inhibitor **12** (50 mg; 82 μmol) was dissolved in a 1:2 mixture of TFA and DCM (1.6 ml; 0.05 M). The mixture was stirred for 2 h at r.t. (**TLC:** (EtOAc:Hept, 60:40 v/v)  $R_f = 0.09$ ). The mixture was then concentrated *in vacuo*. The residue was dissolved in DCM (0.83 ml; 0.1 M) and additional TFA (188 μl, 2.5 mmol, 30 eq) and TEA (690 μl; 4.95 mmol; 60 eq.) were added. Isobutyl chloroformate (*also possible with other chloroformates*) (76 μl; 589 μmol; 20 eq.) was added and the reaction was stirred for 16 h. The mixture was diluted with DCM and washed successively with 0.1M HCl and sat.  $NaHCO_3$ . The organic layer was dried over  $MgSO_4$ , filtered and concentrated *in vacuo*. Silicagel flash column chromatography (0% → 50% EtOAc in Hept) afforded **2** (44 mg; 74 μmol; 90%) as a white solid. **TLC:** (EtOAc:Hept, 60:40 v/v)  $R_f = 0.50$  **<sup>1</sup>H NMR** (500 MHz,  $CDCl_3$ )  $\delta$  7.02 (d,  $J = 9.1$  Hz, 1H,

NH), 5.61 (ddd,  $J = 27.4, 11.0, 2.5$  Hz, 1H, H-4), 5.29 (dd,  $J = 5.3, 2.0$  Hz, 1H, H-7), 5.13 (ddd,  $J = 6.1, 5.2, 2.4$  Hz, 1H, H-8), 4.97 (dd,  $J = 48.9, 2.5$  Hz, 1H, H-3), 4.57 (dd,  $J = 12.5, 2.5$  Hz, 1H, H-9<sub>a</sub>), 4.38 (ddd,  $J = 10.7, 2.0, 0.8$  Hz, 1H, H-6), 4.26 – 4.17 (m, 2H, H-5; H-9<sub>b</sub>), 3.85 (s, 3H, OCH<sub>3</sub>), 2.19 (s, 3H, CH<sub>3</sub>,OAc), 2.18 (s, 3H, CH<sub>3</sub>,OAc), 2.11 (s, 3H, CH<sub>3</sub>,OAc), 2.05 (s, 3H, CH<sub>3</sub>,OAc), 2.04 (s, 3H, CH<sub>3</sub>,OAc). **<sup>13</sup>C NMR** (126 MHz, CDCl<sub>3</sub>)  $\delta$  171.70 (CO, Ac), 170.78 (CO, Ac), 170.76 (CO, Ac), 170.51 (CO, Ac), 167.22 (C-1), 164.94 (CO, Ac), 157.68 (q,  $J = 37.8$  Hz, CO, TFA), 115.50 (q,  $J = 288.4$  Hz, CF<sub>3</sub>), 95.16 (d,  $J = 29.0$  Hz, C-2), 86.90 (d,  $J = 186.1$  Hz, C-3), 71.27 (C-8), 71.00 (C-6), 68.00 (d,  $J = 16.9$  Hz, C-4), 67.91 (C-7), 62.06 (C-9), 53.75 (OCH<sub>3</sub>), 46.43 (d,  $J = 2.4$  Hz, C-5), 20.99 (CH<sub>3</sub>,OAc), 20.82 (CH<sub>3</sub>,OAc), 20.80 (CH<sub>3</sub>,OAc), 20.60 (CH<sub>3</sub>,OAc), 20.56 (CH<sub>3</sub>,OAc). **HR-ESI-TOF/MS** ( $m/z$ ): [M+Na]<sup>+</sup> calcd. for C<sub>22</sub>H<sub>27</sub>F<sub>4</sub>NNaO<sub>14</sub>, 628.12654; found, 628.12591.

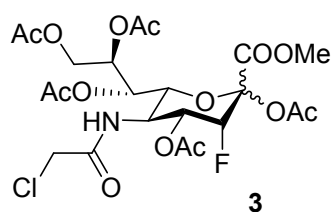

3

**Methyl 5-(chloroacetamido)-2,4,7,8,9-penta-O-acetyl-3,5-dideoxy-3-fluoro-D-glycero- $\beta$ -galacto-non-2-ulopyranosonate (3).** Boc inhibitor **12** (200 mg; 329  $\mu$ mol) was dissolved in a 1:1:2 mixture of DCM, H<sub>2</sub>O and TFA (3.3 mL; 0.1 M). The mixture was stirred for 2 h at r.t. (**TLC**: (EtOAc:Hept, 60:40 v/v)  $R_f = 0.09$ ). The mixture was then diluted with H<sub>2</sub>O and concentrated *in vacuo*. The residue was dissolved in DCM (3.3 mL; 0.1 M) and successively ClAcCl (39  $\mu$ L; 492  $\mu$ mol; 1.5 eq.) and TEA (273  $\mu$ L; 1.97 mmol; 6 eq.) were added. After stirring at r.t. 16 h the mixture was concentrated *in vacuo*. The residue was dissolved in EtOAc and washed with sat. aq. NaHCO<sub>3</sub>. The organic layer was dried over MgSO<sub>4</sub>, filtered and concentrated *in vacuo*. Silicagel flash column chromatography (0%  $\rightarrow$  50% EtOAc in Hept) afforded **3** (116 mg; 198  $\mu$ mol; 60 %) as a white solid. **TLC**: (EtOAc:Hept, 80:20 v/v)  $R_f = 0.48<sup>1</sup>H NMR (500 MHz, CDCl<sub>3</sub>)  $\delta$  6.63 (d,  $J = 8.6$  Hz, 1H, NH), 5.58 (ddd,  $J = 27.5, 10.6, 2.5$  Hz, 1H, H-4), 5.34 (dd,  $J = 5.2, 1.8$  Hz, 1H, H-7), 5.12 (ddd,  $J = 6.4, 5.1, 2.4$  Hz, 1H, H-8), 4.95 (dd,  $J = 49.0, 2.5$  Hz, 1H, H-3), 4.59 (dd,  $J = 12.5, 2.5$  Hz, 1H, H-9<sub>a</sub>), 4.33 – 4.23 (m, 2H, H-6; H-5), 4.21 (dd,  $J = 12.5, 6.5$  Hz, 1H, H-9<sub>b</sub>), 4.02 – 3.93 (m, 2H, CH<sub>2</sub>, ClAc), 3.85 (s, 3H, OCH<sub>3</sub>), 2.19 (s, 3H, CH<sub>3</sub>,OAc), 2.16 (s, 3H, CH<sub>3</sub>,OAc), 2.12 (s, 3H, CH<sub>3</sub>,OAc), 2.06 (s, 3H, CH<sub>3</sub>,OAc), 2.04 (s, 3H, CH<sub>3</sub>,OAc). **<sup>13</sup>C NMR** (126 MHz, CDCl<sub>3</sub>)  $\delta$  170.77 (CO, Ac), 170.66 (CO, Ac), 170.61 (CO, Ac), 170.47 (CO, Ac), 167.23 (C-1), 166.73 (CO, Ac), 165.08 (CO, ClAc), 95.28 (d,  $J = 29.0$  Hz, C-2), 87.01 (d,  $J = 185.7$  Hz, C-3), 71.79 (C-6), 71.50 (C-8), 68.14 (d,  $J = 17.2$  Hz, C-4), 67.88 (C-7), 62.15 (C-9), 53.68 (OCH<sub>3</sub>), 45.91 (d,  $J = 2.6$  Hz, C-5), 42.56 (CH<sub>2</sub>, ClAc), 21.03 (CH<sub>3</sub>,Ac), 20.91 (CH<sub>3</sub>,Ac), 20.86 (CH<sub>3</sub>,Ac), 20.76 (CH<sub>3</sub>,Ac), 20.66 (CH<sub>3</sub>,Ac). **HR-ESI-TOF/MS** ( $m/z$ ): [M+Na]<sup>+</sup> calcd. for C<sub>22</sub>H<sub>29</sub>ClFNNaO<sub>14</sub>, 608.11583; found, 608.11438.$

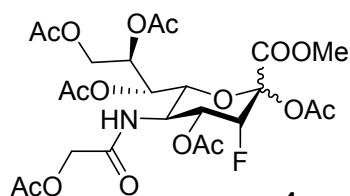

4

**Methyl 5-(acetoxiamido)-2,4,7,8,9-penta-O-acetyl-3,5-dideoxy-3-fluoro-D-glycero- $\beta$ -galacto-non-2-ulopyranosonate (4).** Boc inhibitor **12** (40 mg; 66  $\mu$ mol) was dissolved in a 1:1:2 mixture of DCM, H<sub>2</sub>O and TFA (0.7 ml; 0.1 M). The mixture was stirred for 2 h

at r.t. (**TLC**: (EtOAc:Hept, 60:40 v/v)  $R_f = 0.09$ ). The mixture was then diluted with H<sub>2</sub>O and concentrated *in vacuo*. The residue was dissolved in DCM (0.7 ml; 0.1 M) and successively acetoxyacetyl chloride (11  $\mu$ l; 97  $\mu$ mol; 1.5 eq.) and TEA (45  $\mu$ l; 324  $\mu$ mol; 5 eq.) were added. After stirring at r.t. 16 h the mixture was diluted with DCM and washed successively with 0.1M HCl and sat. NaHCO<sub>3</sub>. The organic layer was dried over MgSO<sub>4</sub>, filtered and concentrated *in vacuo*. Silicagel flash column chromatography (0%  $\rightarrow$  60% EtOAc in Hept) afforded (17 mg; 28  $\mu$ mol; 43%) as a white solid. **TLC**: (EtOAc:Hept, 80:20 v/v)  $R_f = 0.19$ . **<sup>1</sup>H NMR** (500 MHz, CDCl<sub>3</sub>)  $\delta$  6.18 (d,  $J = 9.0$  Hz, 1H, NH), 5.64 (ddd,  $J = 27.9, 11.0, 2.5$  Hz, 1H, H-4), 5.28 (dd,  $J = 5.3, 2.0$  Hz, 1H, H-7), 5.13 (ddd,  $J = 6.3, 5.2, 2.4$  Hz, 1H, H-8), 4.95 (dd,  $J = 49.1, 2.5$  Hz, 1H, H-3), 4.61 (d,  $J = 15.3$  Hz, 1H, **CHH** Glc), 4.56 (dd,  $J = 12.5, 2.4$  Hz, 1H, H-9<sub>a</sub>), 4.32 (d,  $J = 15.3$  Hz, 1H, **CHH** Gc), 4.30 – 4.26 (m, 1H, H-6), 4.22 – 4.15 (m, 2H, H-9<sub>b</sub>; H-5), 3.84 (s, 3H, OCH<sub>3</sub>), 2.20 (s, 3H, CH<sub>3</sub>,OAc), 2.19 (s, 3H, CH<sub>3</sub>,OAc), 2.17 (s, 3H, CH<sub>3</sub>,OAc), 2.11 (s, 3H, CH<sub>3</sub>,OAc), 2.05 (s, 3H, CH<sub>3</sub>,OAc), 2.05 (s, 3H, CH<sub>3</sub>,OAc). **<sup>13</sup>C NMR** (126 MHz, CDCl<sub>3</sub>)  $\delta$  171.05 (CO, Ac), 170.88 (CO, Ac), 170.83 (CO, Ac), 170.53 (CO, Ac), 169.98 (CO, Ac), 168.03 (CO, Ac), 167.35 (CO, C-1), 165.23 (CO, NHGc), 95.38 (d,  $J = 29.0$  Hz, C-2), 87.28 (d,  $J = 185.5$  Hz, C-3), 71.91 (C-6), 71.41 (C-8), 68.27 (C-7), 67.98 (d,  $J = 17.1$  Hz, C-4), 63.01 (CH<sub>2</sub>, Gc), 62.20 (C-9), 53.76 (OCH<sub>3</sub>), 45.88 (d,  $J = 2.6$  Hz, C-5), 21.11 (CH<sub>3</sub>,OAc), 21.07 (CH<sub>3</sub>,OAc), 20.95 (CH<sub>3</sub>,OAc), 20.85 (2xCH<sub>3</sub>,OAc), 20.80 (CH<sub>3</sub>,OAc). **HR-ESI-TOF/MS** ( $m/z$ ): [M+Na]<sup>+</sup> calcd. for C<sub>24</sub>H<sub>32</sub>FNNaO<sub>16</sub>, 632.16028; found, 632.15804.

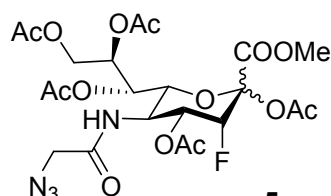

5

**Methyl 5-(azidoacetamido)-2,4,7,8,9-penta-O-acetyl-3,5-dideoxy-3-fluoro-D-glycero- $\beta$ -galacto-non-2-ulopyranosonate (5)**. Boc inhibitor **12** (20 mg; 33  $\mu$ mol) was dissolved in a 1:1:2 mixture of respectively DCM, H<sub>2</sub>O and TFA (0.65 ml; 0.05 M). The mixture was stirred for 2 h at r.t. (**TLC**: (EtOAc:Hept, 60:40 v/v)  $R_f = 0.09$ ). The mixture was then diluted with water and concentrated *in vacuo*. The residue was dissolved in DCM (0.33 ml; 0.1 M) and successively AzOSu (42 mg; 167  $\mu$ mol; 5 eq.), Pyr (27  $\mu$ l; 334  $\mu$ mol; 10 eq.) and DMAP (2 mg, 17  $\mu$ mol; 0.5 eq.) were added. After stirring at r.t. for 23 h the mixture was diluted with DCM and washed successively with 0.1 M HCl and sat. NaHCO<sub>3</sub>. The organic layer was dried over MgSO<sub>4</sub>, filtered and concentrated *in vacuo*. Silicagel flash column chromatography (0%  $\rightarrow$  50% EtOAc in Hept) afforded **5** (3.1 mg; 5.2  $\mu$ mol; 16%). **TLC**: (EtOAc:Hept, 60:40 v/v)  $R_f = 0.20$ . **<sup>1</sup>H NMR** (500 MHz, CDCl<sub>3</sub>)  $\delta$  6.31 (d,  $J = 8.6$  Hz, 1H, NH), 5.54 (ddd,  $J = 27.5, 10.6, 2.5$  Hz, 1H, H-4), 5.34 (dd,  $J = 5.3, 1.8$  Hz, 1H, H-7), 5.13 (td,  $J = 5.7, 2.4$  Hz, 1H, H-8), 4.95 (dd,  $J = 49.0, 2.5$  Hz, 1H, H-3), 4.55 (dd,  $J = 12.5, 2.4$  Hz, 1H, H-9<sub>a</sub>), 4.30 – 4.22 (m, 2H, H-5; H-6), 4.19 (dd,  $J = 12.6, 6.3$  Hz, 1H, H-9<sub>b</sub>), 3.94 – 3.83 (m, 5H, CH<sub>2</sub> NAz; OCH<sub>3</sub>), 2.20 (s, 3H, CH<sub>3</sub>,OAc), 2.16 (s, 3H, CH<sub>3</sub>,OAc), 2.11 (s, 3H, CH<sub>3</sub>,OAc), 2.05 (s, 3H, CH<sub>3</sub>,OAc), 2.04 (s, 3H, CH<sub>3</sub>,OAc). **<sup>13</sup>C NMR** (126 MHz, CDCl<sub>3</sub>)  $\delta$  170.94 (CO, Ac), 170.84 (CO, Ac), 170.66 (CO, Ac), 170.47 (CO, Ac), 167.52 (CO, Ac), 167.31 (C-1), 165.20 (CO, Az), 95.64 (d,  $J = 185.7$  Hz, C-2), 87.16 (d,  $J = 185.7$  Hz, C-3), 71.95 (C-6), 71.43 (C-8), 68.49 (d,  $J = 17.2$  Hz, C-4), 68.02 (C-7), 62.16 (C-9), 53.82 (OCH<sub>3</sub>), 52.89 (CH<sub>2</sub>, Az), 49.50 (C-5), 21.13 (CH<sub>3</sub>,OAc), 21.06 (CH<sub>3</sub>,OAc), 21.00 (CH<sub>3</sub>,OAc), 20.91 (CH<sub>3</sub>,OAc), 20.81 (CH<sub>3</sub>,OAc). **HR-ESI-TOF/MS** ( $m/z$ ): [M+Na]<sup>+</sup> calcd. for C<sub>22</sub>H<sub>29</sub>FN<sub>4</sub>NaO<sub>14</sub>, 615.15620; found, 615.15758.

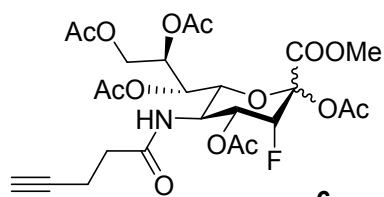

6

**Methyl 5-(4-pentynacetamido)-2,4,7,8,9-penta-O-acetyl-3,5-dideoxy-3-fluoro-D-glycero-β-galacto-non-2-ulopyranosonate (6).** Boc inhibitor **12** (50 mg; 82 μmol) was dissolved in a 1:1:2 mixture of respectively TFA, H<sub>2</sub>O and DCM (1.6 ml; 0.05 M). The mixture was stirred for 2 h at r.t. (TLC: (EtOAc:Hept, 60:40 v/v) R<sub>f</sub> = 0.09). The mixture was then diluted with water and concentrated *in vacuo*. The residue was dissolved in DCM (0.83 ml; 0.1 M) and successively 4-Pentynoic acid-OSu (226 mg; 1.158 mmol; 14 eq.) and TEA (69 μl; 495 μmol; 6 eq.) were added. After stirring at r.t. 16 h the mixture was diluted with DCM and washed successively with 0.1M HCl and sat. aq. NaHCO<sub>3</sub>. The organic layer was dried over MgSO<sub>4</sub>, filtered and concentrated *in vacuo*. Silicagel flash column chromatography (0% → 55% EtOAc in Hept) afforded **6** (3.3 mg; 5.60 μmol; 7%) as a white solid. TLC: (EtOAc:Hept, 60:40 v/v) R<sub>f</sub> = 0.09. **<sup>1</sup>H NMR** (500 MHz, CDCl<sub>3</sub>) δ 5.60 (ddd, *J* = 27.9, 11.0, 2.6 Hz, 1H, H-4), 5.54 (d, *J* = 9.0 Hz, 1H, NH), 5.37 (dd, *J* = 5.5, 2.0 Hz, 1H, H-7), 5.15 (ddd, *J* = 6.3, 5.4, 2.5 Hz, 1H, H-8), 4.95 (dd, *J* = 49.1, 2.5 Hz, 1H, H-3), 4.53 (dd, *J* = 12.5, 2.4 Hz, 1H, H-9<sub>a</sub>), 4.30 – 4.26 (m, 1H, H-6), 4.21 (dd, *J* = 12.5, 6.3 Hz, 1H, H-9<sub>b</sub>), 4.13 (q, *J* = 10.3 Hz, 1H, H-5), 3.84 (s, 3H, OCH<sub>3</sub>), 2.56 – 2.44 (m, 2H, CH<sub>2</sub>C≡CH), 2.40 – 2.27 (m, 2H, CH<sub>2</sub>-CONH), 2.19 (s, 3H, CH<sub>3</sub>,OAc), 2.16 (s, 3H, CH<sub>3</sub>,OAc), 2.11 (s, 3H, CH<sub>3</sub>,OAc), 2.04 (s, 3H, CH<sub>3</sub>,OAc), 2.04 (s, 3H, CH<sub>3</sub>,OAc), 2.02 (t, *J* = 2.6 Hz, 1H, HC≡C). **<sup>13</sup>C NMR** (126 MHz, CDCl<sub>3</sub>) δ 171.38 (CO, Ac), 170.85 (CO, Ac), 170.69 (CO, AC), 170.53 (CO, Ac), 170.31 (CO, Ac), 167.28 (C-1), 165.21 (CONH), 95.29 (d, *J* = 29.0 Hz, C-2), 87.12 (d, *J* = 185.1 Hz, C-3), 82.88 (HC≡C), 71.75 (C-6), 71.21 (C-8), 69.79 (HC≡C), 68.33 – 68.14 (m, C-4; C-7), 62.22 (C-9), 53.65 (OCH<sub>3</sub>), 46.01 (C-5), 35.67 (CH<sub>2</sub>CONH), 21.02 (CH<sub>3</sub>,OAc), 20.98 (CH<sub>3</sub>,OAc), 20.93 (CH<sub>3</sub>,OAc), 20.92 (CH<sub>3</sub>,OAc), 20.74 (CH<sub>3</sub>,OAc), 14.80 (CH<sub>2</sub>C≡CH). **HR-ESI-TOF/MS** (*m/z*): [M+Na]<sup>+</sup> calcd. for C<sub>25</sub>H<sub>32</sub>FNNaO<sub>14</sub>, 612.17045; found, 612.16924.

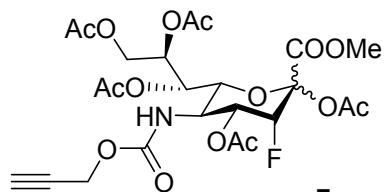

7

**Methyl 5-(propargylcarbamado)-2,4,7,8,9-penta-O-acetyl-3,5-dideoxy-3-fluoro-D-glycero-β-galacto-non-2-ulopyranosonate (7).** Boc inhibitor **12** (50 mg; 82 μmol) was dissolved in a 1:1:2 mixture of respectively DCM, H<sub>2</sub>O and TFA (1.6 ml; 0.05 M). The mixture was stirred for 2 h at r.t. (TLC: (EtOAc:Hept, 60:40 v/v) R<sub>f</sub> = 0.09). The mixture was then diluted with H<sub>2</sub>O and concentrated *in vacuo*. The residue was dissolved in DCM (0.83 ml; 0.1 M) and successively PocOSu (98 mg; 497 μmol; 6 eq.) and TEA (35 μl; 248 μmol; 3 eq.) were added. After stirring at r.t. for 15 h the mixture was diluted with DCM and washed successively with 0.1 M HCl and sat. aq. NaHCO<sub>3</sub>. The organic layer was dried over MgSO<sub>4</sub>, filtered and concentrated *in vacuo*. Silicagel flash column chromatography (0% → 60% EtOAc in Hept) afforded **7** (20 mg; 83 μmol; 40%) as a white solid. TLC: (EtOAc:Hept, 60:40 v/v) R<sub>f</sub> = 0.36. **<sup>1</sup>H NMR** (500 MHz, CDCl<sub>3</sub>) δ 5.53 (dd, *J* = 26.9, 10.8 Hz, 1H, H-4), 5.39 – 5.36 (m, 1H, H-7), 5.18 (td, *J* = 5.9, 2.5 Hz, 1H, H-8), 4.95 (dd, *J* = 49.1, 2.5 Hz, 1H, H-3), 4.87 (d, *J* = 9.5 Hz, 1H, NH), 4.73 (ddd, *J* = 15.5, 5.4, 2.5 Hz, 1H, CHH, Poc), 4.57 – 4.49 (m, 2H, CHH, Poc; H-9<sub>a</sub>), 4.23 – 4.17

(m, 2H, H-9<sub>b</sub>; H-6), 3.95 – 3.86 (m, 1H, H-5), 3.84 (s, 3H, OCH<sub>3</sub>), 2.47 (t, *J* = 2.4 Hz, 1H, C≡CH, Poc), 2.18 (s, 3H, CH<sub>3</sub>,OAc), 2.17 (s, 3H, CH<sub>3</sub>,OAc), 2.13 (s, 3H, CH<sub>3</sub>,OAc), 2.05 (s, 3H, CH<sub>3</sub>,OAc), 2.04 (s, 3H, CH<sub>3</sub>,OAc). <sup>13</sup>C NMR (126 MHz, CDCl<sub>3</sub>) δ 170.75 (CO, Ac), 170.69 (CO, Ac), 170.46 (CO, Ac), 170.24 (CO, Ac), 167.27 (C-1), 165.17 (CO, Ac), 154.75 (CO, Poc), 95.20 (d, *J* = 28.8 Hz, C-2), 87.18 (d, *J* = 185.1 Hz, C-3), 77.95 (C≡CH, Poc), 75.00 (C≡CH, Poc), 71.89 (C-6), 71.00 (C-8), 68.32 – 67.98 (m, C-4; C-7), 62.20 (C-9), 53.66 (OCH<sub>3</sub>), 53.16 (CH<sub>2</sub>, Poc), 47.37 (C-5), 21.00 (CH<sub>3</sub>,OAc), 20.94 (CH<sub>3</sub>,OAc), 20.92 (CH<sub>3</sub>,OAc), 20.82 (CH<sub>3</sub>,OAc), 20.72 (CH<sub>3</sub>,OAc). **HR-ESI-TOF/MS** (*m/z*): [M+Na]<sup>+</sup> calcd. for C<sub>24</sub>H<sub>30</sub>FNNaO<sub>15</sub>, 614.14972; found, 614.15007.

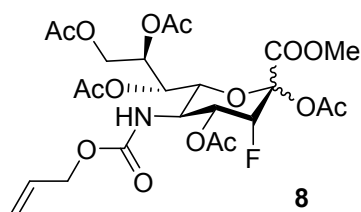

8

**5-(alloxycarbamado)-2,4,7,8,9-penta-O-acetyl-3,5-dideoxy-3-fluoro-D-glycero-β-galacto-non-2-ulopyranosonate (8).** Boc inhibitor **12** (50 mg; 82 μmol) was dissolved in a 1:1:2 mixture of respectively TFA, H<sub>2</sub>O and DCM (1.6 ml; 0.05 M). The mixture was stirred for 2 h at r.t. (**TLC**: (EtOAc:Hept, 60:40 v/v) *R<sub>f</sub>* = 0.09). The mixture was then diluted with water and concentrated *in vacuo*. The residue was dissolved in DCM (0.83 ml; 0.1 M) and Alloc-Cl (11 μl; 99 μmol; 1.2 eq.) and TEA (69 μl; 495 μmol; 6 eq.) were added. After stirring at r.t. for 1 hr additional Alloc-Cl (18 μl; 165 μmol; 2 eq.) was added. The reaction was stirred for 15 h after which the reaction was still not finished, so additional Alloc-Cl (90 μl; 844 μmol; 10.2 eq.) and TEA (35 μl; 252 μmol; 3 eq.) were added. After stirring at r.t. for 5.5 h the mixture was diluted with DCM and washed successively with 0.1M HCl and sat. NaHCO<sub>3</sub>. The organic layer was dried over MgSO<sub>4</sub>, filtered and concentrated *in vacuo*. Silicagel flash column chromatography (0% → 50% EtOAc in Hept) afforded **8** (7.7 mg; 13 μmol; 16%) as a white solid. **TLC**: (EtOAc:Hept, 60:40 v/v) *R<sub>f</sub>* = 0.32. <sup>1</sup>H NMR (500 MHz, CDCl<sub>3</sub>) δ 5.89 (tdd, *J* = 16.1, 8.3, 3.3 Hz, 1H, CHH=CH, Alloc), 5.54 (dd, *J* = 27.7, 10.9 Hz, 1H, H-4), 5.39 (dd, *J* = 5.5, 2.0 Hz, 1H, H-7), 5.28 (dd, *J* = 16.1, 2.4 Hz, 1H, CHH=CH, Alloc), 5.21 (d, *J* = 11.2 Hz, 1H, CHH=CH, Alloc), 5.18 (td, *J* = 6.0, 2.5 Hz, 1H, H-8), 4.95 (dd, *J* = 49.1, 2.5 Hz, 1H, H-3), 4.79 (d, *J* = 9.3 Hz, 1H, NH), 4.60 – 4.45 (m, 3H, H-9<sub>a</sub>; OCH<sub>2</sub> Alloc), 4.24 – 4.17 (m, 2H, H-6; H-9<sub>b</sub>), 3.94 – 3.87 (m, 1H, H-5), 3.84 (s, 3H, OCH<sub>3</sub>), 2.18 (s, 3H, CH<sub>3</sub>,OAc), 2.17 (s, 3H, CH<sub>3</sub>,OAc), 2.11 (s, 3H, CH<sub>3</sub>,OAc), 2.05 (s, 3H, CH<sub>3</sub>,OAc), 2.04 (s, 3H, CH<sub>3</sub>,OAc). <sup>13</sup>C NMR (126 MHz, CDCl<sub>3</sub>) δ 170.75 (CO, Ac), 170.66 (CO, Ac), 170.45 (CO, Ac), 170.27 (CO, Ac), 167.30 (C-1), 165.22 (CO, Ac), 155.41 (CO, Alloc), 132.65 (CH<sub>2</sub>=CH, Alloc), 117.84 (CH<sub>2</sub>=CH, Alloc), 95.21 (d, *J* = 28.8 Hz, C-2), 87.20 (d, *J* = 184.9 Hz, C-3), 71.98 (C-6), 71.07 (C-8), 68.17 – 67.92 (C-4; C-7), 66.09 (OCH<sub>2</sub>, Alloc), 62.24 (C-9), 53.64 (OCH<sub>3</sub>), 47.22 (C-5), 20.99 (CH<sub>3</sub>,OAc), 20.93 (CH<sub>3</sub>,OAc), 20.91 (CH<sub>3</sub>,OAc), 20.80 (CH<sub>3</sub>,OAc), 20.71 (CH<sub>3</sub>,OAc). **HR-ESI-TOF/MS** (*m/z*): [M+Na]<sup>+</sup> calcd. for C<sub>24</sub>H<sub>32</sub>FNNaO<sub>15</sub>, 616.16537; found, 616.16544.

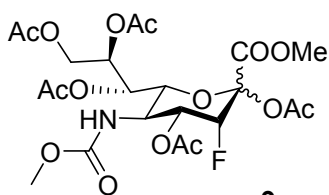

9

**Methyl 5-(methylcarbamado)-2,4,7,8,9-penta-O-acetyl-3,5-dideoxy-3-fluoro-D-glycero-β-galacto-non-2-ulopyranosonate (9).** Boc inhibitor **12** (50 mg; 82 μmol) was dissolved in a 1:1:3 mixture of respectively TFA, water and DCM (1.6 ml; 0.05 M). The mixture was stirred for 2 h at r.t. (TLC: (EtOAc:Hept, 60:40 v/v)  $R_f$  = 0.09). The mixture was then diluted with H<sub>2</sub>O and concentrated *in vacuo*. The residue was dissolved in DCM (0.8 ml; 0.1 M) and Me-chloroformate (183 μl; 1.649 mmol; 20 eq.) and TEA (229 μl; 1.649 mmol; 20 eq.) were added. The reaction was stirred at r.t. 16 h after which the mixture was diluted with DCM and washed successively with 0.1M HCl and sat. NaHCO<sub>3</sub>. The organic layer was dried over MgSO<sub>4</sub>, filtered and concentrated *in vacuo*. Silicagel flash column chromatography (0% → 50% EtOAc in Hept) afforded **9** (16 mg; 27 μmol; 33%). TLC: (EtOAc:Hept:MeOH, 45:45:10 v/v)  $R_f$  = 0.27. **<sup>1</sup>H NMR** (400 MHz, CDCl<sub>3</sub>) δ 5.59 – 5.47 (m, 1H, H-4), 5.41 – 5.38 (m, 1H, H-7), 5.17 (ddd,  $J$  = 6.3, 5.3, 2.5 Hz, 1H, H-8), 4.95 (dd,  $J$  = 49.1, 2.6 Hz, 1H, H-3), 4.77 (d,  $J$  = 9.2 Hz, 1H, NH), 4.54 (dd,  $J$  = 12.5, 2.6 Hz, 1H, H-9<sub>a</sub>), 4.25 – 4.17 (m, 2H, H-9<sub>b</sub>; H-6), 3.88 – 3.85 (m, 1H, H-5), 3.84 (s, 3H, CH<sub>3</sub>O-C-1), 3.64 (s, 3H, CH<sub>3</sub>O-CONH), 2.18 (s, 3H, CH<sub>3</sub>OAc), 2.17 (s, 3H, CH<sub>3</sub>OAc), 2.12 (s, 3H, CH<sub>3</sub>OAc), 2.05 (s, 3H, CH<sub>3</sub>OAc), 2.04 (s, 3H, CH<sub>3</sub>OAc). **<sup>13</sup>C NMR** (101 MHz, CDCl<sub>3</sub>) δ 170.73 (2xCO, Ac), 170.45 (CO, Ac), 170.30 (CO, Ac), 167.30 (C-1), 165.21 (CO, Ac), 156.17 (NHCO), 95.20 (d,  $J$  = 28.7 Hz, C-2), 87.18 (d,  $J$  = 184.8 Hz, C-3), 72.04 (C-6), 71.20 (C-8), 68.42 – 68.16 (m, C-4; C-7), 62.26 (C-9), 53.62 (CH<sub>3</sub>O-C-1), 52.76 (CH<sub>3</sub>O-CONH), 47.26 (C-5), 20.99 (CH<sub>3</sub>OAc), 20.91 (CH<sub>3</sub>OAc), 20.90 (CH<sub>3</sub>OAc), 20.78 (CH<sub>3</sub>OAc), 20.68 (CH<sub>3</sub>OAc). **HR-ESI-TOF/MS** ( $m/z$ ): [M+Na]<sup>+</sup> calcd. for C<sub>22</sub>H<sub>30</sub>FNNaO<sub>15</sub>, 590.14972; found, 590.14874.

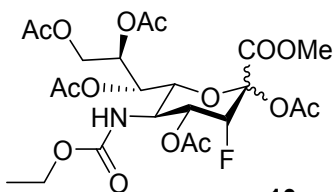

10

**Methyl 5-(ethylcarbamado)-2,4,7,8,9-penta-O-acetyl-3,5-dideoxy-3-fluoro-D-glycero-β-galacto-non-2-ulopyranosonate (10).** Boc inhibitor **12** (50 mg; 82 μmol) was dissolved in a 1:1:3 mixture of respectively TFA, water and DCM (1.6 ml; 0.05 M). The mixture was stirred for 2 h at r.t. (TLC: (EtOAc:Hept, 60:40 v/v)  $R_f$  = 0.09). The mixture was then diluted with water and concentrated *in vacuo*. The residue was dissolved in DCM (0.8 ml; 0.1 M) and Et-chloroformate (197 μl; 1.649 mmol; 20 eq.) and TEA (229 μl; 1.649 mmol; 20 eq.) were added. The reaction was stirred at r.t. 16 h after which the mixture was diluted with DCM and washed successively with 0.1M HCl and sat. NaHCO<sub>3</sub>. The organic layer was dried over MgSO<sub>4</sub>, filtered and concentrated *in vacuo*. Silicagel flash column chromatography (0% → 50% EtOAc in Hept) afforded **10** (8 mg; 13 μmol; 16%). TLC: (EtOAc:Hept:MeOH, 45:45:10 v/v)  $R_f$  = 0.28. **<sup>1</sup>H NMR** (400 MHz, CDCl<sub>3</sub>) δ 5.58 – 5.46 (m, 1H, H-4), 5.40 (dt,  $J$  = 5.0, 2.4 Hz, 1H, H-7), 5.18 (td,  $J$  = 5.8, 2.7 Hz, 1H, H-8), 4.95 (dd,  $J$  = 49.2, 2.5 Hz, 1H, H-3), 4.65 (d,  $J$  = 9.3 Hz, 1H, NH), 4.57 – 4.51 (m, 1H, H-9<sub>a</sub>), 4.24 – 4.16 (m, 2H, H-9<sub>b</sub>; H-6), 4.11 – 4.03 (m, 2H, CH<sub>2</sub>, Et), 3.90 (d,  $J$  = 10.3 Hz, 1H, H-5), 3.84 (s, 3H, OCH<sub>3</sub>), 2.18 (s, 3H, CH<sub>3</sub>OAc), 2.17 (s, 3H, CH<sub>3</sub>OAc), 2.12 (s, 3H, CH<sub>3</sub>OAc), 2.05 (s, 3H, CH<sub>3</sub>OAc), 2.04 (s, 3H, CH<sub>3</sub>OAc), 1.25 – 1.20 (m, 3H, CH<sub>3</sub>, Et). **<sup>13</sup>C NMR** (101 MHz, CDCl<sub>3</sub>) δ 170.73 (CO, Ac), 170.66 (CO, Ac), 170.42 (CO, Ac), 170.29 (CO, Ac),

167.27 (C-1), 165.42 (CO, Ac), 155.74 (CONH), 95.24 (d,  $J = 28.6$  Hz, C-2), 87.23 (d,  $J = 184.8$  Hz, C-3), 72.15 (C-6), 71.16 (C-8), 68.20 (C-4), 67.89 (C-7), 62.27 (C-9), 61.63 (CH<sub>2</sub>, Et), 53.62 (OCH<sub>3</sub>), 47.13 (C-5), 20.99 (CH<sub>3</sub>,OAc), 20.93 (CH<sub>3</sub>,OAc), 20.91 (CH<sub>3</sub>,OAc), 20.78 (CH<sub>3</sub>,OAc), 20.71 (CH<sub>3</sub>,OAc), 14.62 (CH<sub>3</sub>,Et). **HR-ESI-TOF/MS** ( $m/z$ ):  $[M+Na]^+$  calcd. for C<sub>23</sub>H<sub>32</sub>FNNaO<sub>15</sub>, 604.16537; found, 604.16438.

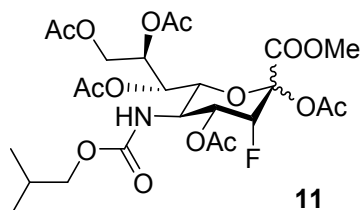

11

**Methyl 5-(isobutylcarbamado)-2,4,7,8,9-penta-O-acetyl-3,5-**

**dideoxy-3-fluoro-D-glycero-β-galacto-non-2-ulopyranosonate (11).** Boc inhibitor **12** (18 mg; 30 μmol) was dissolved in a 1:1:3 mixture of respectively TFA, H<sub>2</sub>O and DCM (0.6 ml; 0.05 M). The mixture was stirred for 2 h at r.t. (**TLC**: (EtOAc:Hept, 60:40 v/v)  $R_f = 0.09$ ). The mixture was then diluted with H<sub>2</sub>O and concentrated *in vacuo*. The mixture was redissolved in Tol and concentrated *in vacuo* three times. The residue was then dissolved in DCM (0.3 ml; 0.1 M) and *i*Bu chloroformate (76 μl; 589 μmol; 20 eq.) and TEA (82 μl; 589 μmol; 20 eq.) were added. The reaction was stirred at r.t. 16 h after which the mixture was diluted with DCM and washed successively with 0.1M HCl and sat. NaHCO<sub>3</sub>. The organic layer was dried over MgSO<sub>4</sub>, filtered and concentrated *in vacuo*. Silicagel flash column chromatography (0% → 50% EtOAc in Hept) afforded **11** (6 mg; 9.8 μmol; 33%). **TLC**: (EtOAc:Hept:MeOH, 45:45:10 v/v)  $R_f = 0.40$ . **<sup>1</sup>H NMR** (400 MHz, CDCl<sub>3</sub>) δ 5.64 – 5.49 (m, 1H, H-4), 5.42 – 5.37 (m, 1H, H-7), 5.18 (td,  $J = 6.0, 2.5$  Hz, 1H, H-8), 4.95 (dd,  $J = 49.2, 2.5$  Hz, 1H, H-3), 4.73 (d,  $J = 9.1$  Hz, 1H, NH), 4.53 (dd,  $J = 12.5, 2.5$  Hz, 1H, H-9<sub>a</sub>), 4.25 – 4.17 (m, 2H, H-9<sub>b</sub>; H-6), 3.92 – 3.75 (m, 6H, H-5; OCH<sub>3</sub>; CH<sub>2</sub>, *i*Bu), 2.18 (s, 3H, CH<sub>3</sub>,OAc), 2.17 (s, 3H, CH<sub>3</sub>,OAc), 2.11 (s, 3H, CH<sub>3</sub>,OAc), 2.04 (s, 3H, CH<sub>3</sub>,OAc), 2.04 (s, 3H, CH<sub>3</sub>,OAc), 1.95 – 1.84 (m, 1H, CH, *i*Bu), 0.90 (d,  $J = 6.8$  Hz, 6H, 2xCH<sub>3</sub>,*i*Bu). **<sup>13</sup>C NMR** (101 MHz, CDCl<sub>3</sub>) δ 170.72 (CO, Ac), 170.39 (CO, Ac), 170.21 (CO, Ac), 170.00 (CO, Ac), 167.28 (C-1), 165.24 (CO, Ac), 155.87 (CONH), 95.25 (d,  $J = 29.0$  Hz, C-2), 87.24 (d,  $J = 184.8$  Hz, C-3), 72.00 (C-6), 71.56 (CH<sub>2</sub>, *i*Bu), 71.06 (C-8), 68.16 – 68.01 (m, C-7; C-4), 62.21 (C-9), 53.62 (OCH<sub>3</sub>), 47.18 (C-5), 28.05 (CH<sub>2</sub>, *i*Bu), 20.98 (CH<sub>3</sub>,OAc), 20.92 (CH<sub>3</sub>,OAc), 20.89 (CH<sub>3</sub>,OAc), 20.75 (CH<sub>3</sub>,OAc), 20.70 (CH<sub>3</sub>,OAc), 19.02 (2xCH<sub>3</sub>,*i*Bu) **HR-ESI-TOF/MS** ( $m/z$ ):  $[M+Na]^+$  calcd. for C<sub>25</sub>H<sub>36</sub>FNNaO<sub>15</sub>, 632.19667; found, 632.19698.

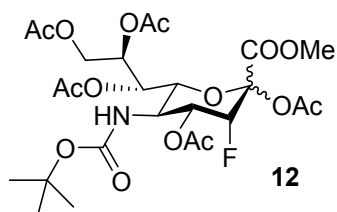

12

**Methyl 5-(tert-butoxycarbamado)-2,4,7,8,9-penta-O-acetyl-3,5-**

**dideoxy-3-fluoro-D-glycero-β-galacto-non-2-ulopyranosonate (12).** To a solution of **21** (789 mg; 1.39 mmol) in Pyr (12 ml; 148 mmol; 107 eq.), Ac<sub>2</sub>O (6 ml; 63.6 mmol; 45.7 eq.) was slowly added. After stirring at r.t. for 24 h, the mixture was concentrated *in vacuo* using Tol for co-evaporation. The residue was dissolved in EtOAc and washed successively with HCl (0.1M) and sat. aq. NaHCO<sub>3</sub>. The organic layer was dried over MgSO<sub>4</sub>, filtered and concentrated *in vacuo*. Silicagel flash column chromatography (0% → 50% EtOAc in Hept) afforded **12** (717 mg; 1.176 mmol; 95%) as a white foam. **TLC**: (EtOAc:Hept, 50:50 v/v)  $R_f = 0.42$  **<sup>1</sup>H NMR** (500 MHz, CDCl<sub>3</sub>)

$\delta$  5.46 – 5.34 (m, 2H, H-7; H-4), 5.18 – 5.11 (m, 1H, H-8), 4.92 (dd,  $J = 49.1, 2.5$  Hz, 1H, H-3), 4.60 – 4.54 (m, 1H, H-9<sub>a</sub>), 4.48 (d,  $J = 9.5$  Hz, 1H, NH), 4.19 (dd,  $J = 12.4, 6.6$  Hz, 1H, H-9<sub>b</sub>), 4.12 – 3.97 (m, 2H, H-6; H-5), 3.84 (s, 3H, OCH<sub>3</sub>), 2.17 (s, 3H, CH<sub>3</sub>,OAc), 2.16 (s, 3H, CH<sub>3</sub>,OAc), 2.12 (s, 3H, CH<sub>3</sub>,OAc), 2.05 (s, 3H, CH<sub>3</sub>,OAc), 2.04 (s, 3H, CH<sub>3</sub>,OAc), 1.40 (s, 9H, <sup>t</sup>Bu, Boc). **<sup>13</sup>C NMR** (126 MHz, CDCl<sub>3</sub>)  $\delta$  170.73 (CO, Ac), 170.48 (CO, Ac), 170.36 (CO, Ac), 170.25 (CO, Ac), 167.24 (CO, Ac), 165.28 (C-1), 154.88 (CO, Boc), 95.33 (d,  $J = 29.0$  Hz, C-2), 87.21 (d,  $J = 185.1$  Hz, C-3), 80.51 (C(CH<sub>3</sub>)<sub>3</sub>, Boc), 72.67 (C-6), 71.39 (C-8), 68.97 (d,  $J = 17.2$  Hz, C-4), 68.09 (C-7), 62.32 (C-9), 53.60 (OCH<sub>3</sub>), 46.32 (C-5), 28.27 (<sup>t</sup>Bu, Boc), 21.00 (CH<sub>3</sub>,OAc), 20.90 (CH<sub>3</sub>,OAc), 20.86 (CH<sub>3</sub>,OAc), 20.82 (CH<sub>3</sub>,OAc), 20.74 (CH<sub>3</sub>,OAc). **HR-ESI-TOF/MS** ( $m/z$ ): [M+Na]<sup>+</sup> calcd. for C<sub>25</sub>H<sub>36</sub>FNNaO<sub>15</sub>, 632.19667; found, 632.19540.

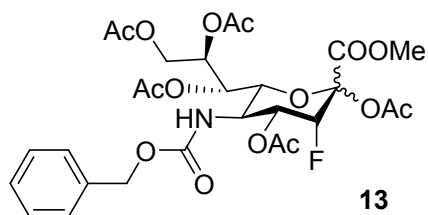

**13**

**Methyl 5-(benzylcarbamado)-2,4,7,8,9-penta-O-acetyl-3,5-dideoxy-3-fluoro-D-glycero- $\beta$ -galacto-non-2-ulopyranosonate (13).** Boc inhibitor **12** (50 mg; 82  $\mu$ mol) was dissolved in a 1:1:2 mixture of respectively TFA, H<sub>2</sub>O and DCM (1.6 mL; 0.05 M). The mixture was stirred for 2 h at r.t. (**TLC**: (EtOAc:Hept, 60:40 v/v)  $R_f = 0.09$ ). The mixture was then diluted with H<sub>2</sub>O and concentrated *in vacuo*. The residue was dissolved in DCM (0.83 mL; 0.1 M) and Cbz-Cl (14  $\mu$ l; 99  $\mu$ mol; 1.2 eq.) and TEA (69  $\mu$ l; 495  $\mu$ mol; 6 eq.) were added. After stirring at r.t. for 1 hr additional Cbz-Cl (24  $\mu$ l; 165  $\mu$ mol; 2 eq.) was added. The reaction was stirred for 15 h after which the reaction was still not finished, so additional Cbz-Cl (125  $\mu$ l; 874  $\mu$ mol; 10.5 eq.) and TEA (35  $\mu$ l; 252  $\mu$ mol; 3 eq.) were added. After stirring at r.t. for 5.5 h the mixture was diluted with DCM and washed successively with 0.1M HCl and sat. NaHCO<sub>3</sub>. The organic layer was dried over MgSO<sub>4</sub>, filtered and concentrated *in vacuo*. Silicagel flash column chromatography (0%  $\rightarrow$  50% EtOAc in Hept) afforded **13** (3.3 mg; 5.1  $\mu$ mol; 6%) as a white solid. **TLC**: (EtOAc:Hept, 60:40 v/v)  $R_f = 0.43$ . **<sup>1</sup>H NMR** (500 MHz, CDCl<sub>3</sub>)  $\delta$  7.37 – 7.30 (m, 5H, 5xCH, Cbz), 5.52 (dd,  $J = 27.7, 11.0$  Hz, 1H, H-4), 5.41 (dd,  $J = 5.8, 2.0$  Hz, 1H, H-7), 5.18 (td,  $J = 5.9, 2.6$  Hz, 1H, H-8), 5.15 (d,  $J = 12.4$  Hz, 1H, CHH, Cbz), 5.02 – 4.88 (m, 2H, CHH, Cbz; H-3), 4.78 (d,  $J = 9.5$  Hz, 1H, NH), 4.56 – 4.49 (m, 1H, H-9<sub>a</sub>), 4.24 – 4.17 (m, 2H, H-9<sub>b</sub>; H-6), 3.91 (q,  $J = 10.5$  Hz, 1H, H-5), 3.83 (s, 3H, OCH<sub>3</sub>), 2.16 (s, 3H, CH<sub>3</sub>,OAc), 2.17 (s, 3H, CH<sub>3</sub>,OAc), 2.03 (s, 3H, CH<sub>3</sub>,OAc), 2.02 (s, 3H, CH<sub>3</sub>,OAc), 1.97 (s, 3H, CH<sub>3</sub>,OAc). **<sup>13</sup>C NMR** (126 MHz, CDCl<sub>3</sub>)  $\delta$  170.74 (CO, Ac), 170.64 (CO, Ac), 170.43 (CO, Ac), 170.20 (CO, Ac), 167.26 (C-1), 165.21 (CO, Ac), 155.54 (CO, Cbz), 136.39 (C, Cbz), 128.68 (2xCH, *ortho* Cbz), 128.36 (CH, *para* Cbz), 128.15 (2xCH, *meta* Cbz), 95.22 (d,  $J = 29.0$  Hz, C-2), 87.21 (d,  $J = 184.9$  Hz, C-3), 71.99 (C-6), 70.98 (C-8), 68.11 – 67.91 (m, C-4; C-7), 67.18 (CH<sub>2</sub>, Cbz), 62.21 (C-9), 53.64 (OCH<sub>3</sub>), 47.27 (C-5), 20.97 (CH<sub>3</sub>,OAc), 20.94 (CH<sub>3</sub>,OAc), 20.92 (CH<sub>3</sub>,OAc), 20.72 (CH<sub>3</sub>,OAc), 20.62 (CH<sub>3</sub>,OAc). **HR-ESI-TOF/MS** ( $m/z$ ): [M+Na]<sup>+</sup> calcd. for C<sub>28</sub>H<sub>34</sub>FNNaO<sub>15</sub>, 666.18102; found, 666.18010.



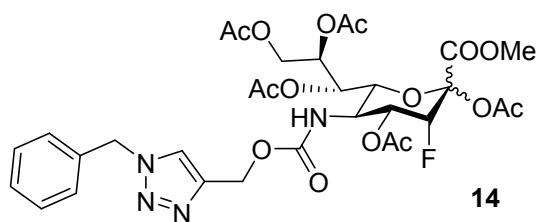

14

Methyl

5-[(1-benzyl-1H-1,2,3-triazol-4-

yl)methylcarbamado]-2,4,7,8,9-penta-O-acetyl-3,5-dideoxy-3-fluoro-D-glycero-β-galactono-2-ulopyranosonate (**14**). To a mixture of **7** (10 mg; 17 μmol) in a 1:9 mixture of H<sub>2</sub>O and <sup>t</sup>BuOH (0.19 ml; 0.09 M), Bn-N<sub>3</sub> (4.5 mg; 34 μmol; 2 eq.) was added. A premixture of TBTA (29 mg), DMF (750 μL) and CuI (5.1 mg) was agitated until a homogenous solution was obtained. The TBTA mixture (95 μl) was added to the H<sub>2</sub>O/<sup>t</sup>BuOH mixture and 10 mg of copper flakes were added. The reaction was stirred at r.t. 16 h, filtered and concentrated *in vacuo*. Silicagel flash column chromatography (0% → 80% EtOAc in Hept) afforded **14** (5.7 mg; 17 μmol; 46%) as a white solid. **TLC**: (EtOAc:Hept, 80:20 v/v) R<sub>f</sub> = 0.37. **<sup>1</sup>H NMR** (500 MHz, CDCl<sub>3</sub>) δ 7.64 (s, 1H, CH, triazole), 7.37 (d, *J* = 2.2 Hz, 2H, 2xCH, *ortho* Bn), 7.32 – 7.29 (m, 2H, 2xCH, *meta* Bn), 6.91 (dd, *J* = 10.3, 6.8 Hz, 1H, CH, *para* Bn), 5.58 – 5.41 (m, 2H, CH<sub>2</sub>, Bn), 5.34 – 5.28 (m, 1H, H-7), 5.23 – 5.05 (m, 2H, CH<sub>2</sub>, Poc), 5.00 (d, *J* = 8.9 Hz, 1H, NH), 4.93 (dd, *J* = 49.1, 2.5 Hz, 1H, H-3), 4.50 (dd, *J* = 12.6, 2.6 Hz, 1H, H-9<sub>a</sub>), 4.20 – 4.14 (m, 2H, H-9<sub>b</sub>; H-6), 3.92 (q, *J* = 10.4 Hz, 1H, H-5), 3.83 (s, 3H, OCH<sub>3</sub>), 2.16 (s, 3H, CH<sub>3</sub>,OAc), 2.14 (s, 3H, CH<sub>3</sub>,OAc), 2.02 (s, 3H, CH<sub>3</sub>,OAc), 2.02 (s, 3H, CH<sub>3</sub>,OAc), 1.97 (s, 3H, CH<sub>3</sub>,OAc). **<sup>13</sup>C NMR** (126 MHz, CDCl<sub>3</sub>) δ 170.88 (CO, Ac), 170.72 (CO, Ac), 170.52 (CO, Ac), 170.34 (CO, Ac), 167.39 (C-1), 165.27 (CO, Ac), 155.63 (CO, Poc), 134.64 (C, Bn), 129.38 (2xCH, *meta* Bn), 129.09 (CH, *para* Bn), 128.44 (2xCH, *ortho* Bn), 125.00 (CH, triazole), 95.25 (d, *J* = 28.9 Hz, C-2), 87.21 (d, *J* = 185.0 Hz, C-3), 72.15 (C-6), 71.15 (C-8), 68.47 (d, *J* = 17.0 Hz, C-4), 68.30 (C-7), 62.30 (C-9), 58.65 (CH<sub>2</sub>, Poc), 54.52 (CH<sub>2</sub>, Bn), 53.74 (OCH<sub>3</sub>), 47.22 (C-5), 21.07 (CH<sub>3</sub>,OAc), 21.05 (CH<sub>3</sub>,OAc), 21.01 (CH<sub>3</sub>,OAc), 20.78 (CH<sub>3</sub>,OAc), 20.74 (CH<sub>3</sub>,OAc). **HR-ESI-TOF/MS** (*m/z*): [M+Na]<sup>+</sup> calcd. for C<sub>31</sub>H<sub>37</sub>FN<sub>4</sub>NaO<sub>15</sub>, 747.21371; found, 747.21371.

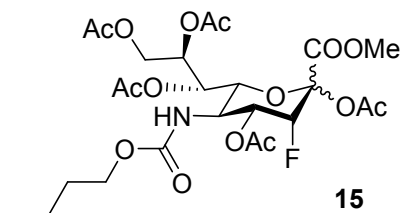

15

Methyl 5-(butylcarbamado)-2,4,7,8,9-penta-O-acetyl-3,5-

dideoxy-3-fluoro-D-glycero-β-galactono-2-ulopyranosonate (**15**). Boc inhibitor **12** (25 mg; 41 μmol) was dissolved in DCM (1 ml; 0.041 M) and TfOH (14 μl; 164 μmol; 4 eq.) was added and stirred for 5 min at r.t. (**TLC**: (EtOAc:Hept, 60:40 v/v) R<sub>f</sub> = 0.09) then n-Bu chloroformate (27 μl; 205 μmol; 5 eq.) and TEA (57 μl; 410 μmol; 10 eq.) were added. The reaction was left stirring for 16 h at r.t., diluted with an excess of DCM washed successively with 0.1M HCl and sat. NaHCO<sub>3</sub>. The organic layer was dried over MgSO<sub>4</sub>, filtered and concentrated *in vacuo*. Silicagel flash column chromatography (0% → 50% EtOAc in Hept) afforded **15** (8 mg; 41 μmol; 32%) as a white solid. **TLC**: (EtOAc) R<sub>f</sub> = 0.90. **<sup>1</sup>H NMR** (500 MHz, CDCl<sub>3</sub>) δ 5.54 (dd, *J* = 27.9, 11.3 Hz, 1H, H-4), 5.39 (d, *J* = 5.9 Hz, 1H, H-7), 5.18 (td, *J* = 6.0, 2.5 Hz, 1H, H-8), 4.95 (dd, *J* = 49.2, 2.5 Hz, 1H, H-3), 4.73 – 4.66 (m, 1H, NH), 4.53 (dd, *J* = 12.4, 2.6 Hz, 1H, H-9<sub>a</sub>), 4.24 – 4.17 (m, 2H, H-9<sub>b</sub>; H-6), 4.08 – 3.96 (m, 2H, (CO)CH<sub>2</sub>, n-Bu), 3.93 – 3.84 (m, 1H, H-5), 3.84 (s, 3H, OCH<sub>3</sub>), 2.18 (s, 3H, CH<sub>3</sub>,OAc), 2.17 (s, 3H, CH<sub>3</sub>,OAc), 2.11 (s, 3H, CH<sub>3</sub>,OAc), 2.05 (s, 3H, CH<sub>3</sub>,OAc), 2.04 (s, 3H, CH<sub>3</sub>,OAc), 1.61 – 1.54 (m, 2H, CH<sub>2</sub>CH<sub>2</sub>CH<sub>2</sub>, n-Bu), 1.39 – 1.32 (m, 2H, CH<sub>2</sub>CH<sub>3</sub>, n-Bu), 0.93

(t,  $J = 7.4$  Hz, 3H,  $\text{CH}_2\text{CH}_3$ , n-Bu).  $^{13}\text{C}$  NMR (126 MHz, Chloroform- $d$ )  $\delta$  170.59 (CO, Ac), 170.45 (CO, Ac), 170.25 (CO, Ac), 170.09 (CO, Ac), 167.14 (C-1), 165.10 (CO, Ac), 155.70 (CONH), 95.09 (d,  $J = 28.8$  Hz, C-2), 87.08 (d,  $J = 184.7$  Hz, C-3), 71.92 (C-6), 70.96 (C-8), 69.30 (d,  $J = 13.5$  Hz, C-4), 68.00 (C-7), 65.31 (C(O) $\text{CH}_2$ , n-Bu), 62.09 (C-9), 53.48 (OCH<sub>3</sub>), 46.99 (C-5), 30.85 ( $\text{CH}_2\text{CH}_2\text{CH}_2$ , n-Bu), 20.84 (CH<sub>3</sub>, OAc), 20.78 (CH<sub>3</sub>, OAc), 20.75 (CH<sub>3</sub>, OAc), 20.62 (CH<sub>3</sub>, OAc), 20.56 (CH<sub>3</sub>, OAc), 18.93 ( $\text{CH}_2\text{CH}_3$ , n-Bu), 13.68 ( $\text{CH}_2\text{CH}_3$ , n-Bu).  $^{19}\text{F}$  NMR (470 MHz,  $\text{CDCl}_3$ )  $\delta$  -209.10 (dd,  $J = 49.1, 27.9$  Hz). HR-ESI-TOF/MS ( $m/z$ ):  $[\text{M}+\text{Na}]^+$  calcd. for  $\text{C}_{25}\text{H}_{36}\text{FN}_4\text{NaO}_{15}$ , 632.19667; found, 632.19640.

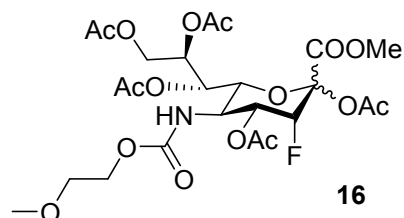

16

**Methyl 5-(2-methoxy-ethylcarbamado)-2,4,7,8,9-penta-O-acetyl-3,5-dideoxy-3-fluoro-D-glycero- $\beta$ -galacto-non-2-ulopyranosonate (16).** Boc inhibitor **12** (40 mg; 66  $\mu\text{mol}$ ) was dissolved in DCM (1 ml; 0.066 M) and TfOH (23  $\mu\text{l}$ ; 262  $\mu\text{m}$ ; 4 eq.) was added and stirred for 5 min at r.t. (TLC: (EtOAc:Hept, 60:40 v/v)  $R_f = 0.09$ ) then 2-methoxyethyl chloroformate (38  $\mu\text{l}$ ; 328  $\mu\text{m}$ ; 5 eq.) and TEA (91  $\mu\text{l}$ ; 656  $\mu\text{m}$ ; 10 eq.) were added. The reaction was left stirring for 16 h at r.t., diluted with an excess of DCM washed successively with 0.1M HCl and sat.  $\text{NaHCO}_3$ . The organic layer was dried over  $\text{MgSO}_4$ , filtered and concentrated *in vacuo*. Silicagel flash column chromatography (0%  $\rightarrow$  50% EtOAc in Hept) afforded **16** (36 mg; 66  $\mu\text{mol}$ ; 90%) as a white solid. TLC: (EtOAc)  $R_f = 0.80$ .  $^1\text{H}$  NMR (500 MHz,  $\text{CDCl}_3$ )  $\delta$  5.51 (ddd,  $J = 27.9, 11.1, 3.1$  Hz, 1H, H-4), 5.39 (dd,  $J = 5.7, 1.9$  Hz, 1H, H-7), 5.21 – 5.14 (m, 1H, H-8), 4.95 (dd,  $J = 49.1, 2.5$  Hz, 1H, H3), 4.86 (d,  $J = 9.1$  Hz, 1H, NH), 4.52 (dd,  $J = 12.5, 2.6$  Hz, 1H, H-9a), 4.23 – 4.15 (m, 4H, H-9b, H-6,  $\text{CH}_2\text{CH}_2\text{C}(\text{O})$ ), 3.92 – 3.86 (m, 1H, H-5), 3.83 (s, 3H,  $\text{COOCH}_3$ ), 3.55 (ddd,  $J = 6.6, 5.2, 2.7$  Hz, 2H,  $\text{CH}_3\text{OCH}_2\text{CH}_2$ ), 3.37 (s, 3H, OCH<sub>3</sub>), 2.17 (s, 3H, CH<sub>3</sub>, OAc), 2.15 (s, 3H, CH<sub>3</sub>, OAc), 2.11 (s, 3H, CH<sub>3</sub>, OAc), 2.04 (s, 3H, CH<sub>3</sub>, OAc), 2.03 (s, 3H, CH<sub>3</sub>, OAc).  $^{13}\text{C}$  NMR (126 MHz,  $\text{CDCl}_3$ )  $\delta$  170.61 (CO), 170.44 (CO), 170.26 (CO), 170.04 (CO), 167.17 (CO), 165.07 (CO), 155.43 (CONH), 95.05 (d,  $J = 28.9$  Hz, C-2), 87.01 (d,  $J = 184.8$  Hz, C-3), 71.82 (C-6), 70.66 (C-8), 70.61  $\text{CH}_2\text{CH}_2\text{C}(\text{O})$ , 68.16 (d,  $J = 17.1$  Hz, C-4), 67.98 (C-7), 64.46 ( $\text{CH}_3\text{OCH}_2\text{CH}_2$ ), 62.06 (C-9), 58.87 (OCH<sub>3</sub>), 53.47 ( $\text{COOCH}_3$ ), 46.99 (C-5), 20.83 (CH<sub>3</sub>, OAc), 20.78 (CH<sub>3</sub>, OAc), 20.76 (CH<sub>3</sub>, OAc), 20.63 (CH<sub>3</sub>, OAc), 20.56 (CH<sub>3</sub>, OAc).  $^{19}\text{F}$  NMR (470 MHz,  $\text{CDCl}_3$ )  $\delta$  -209.21 (dd,  $J = 49.2, 27.9$  Hz). HR-ESI-TOF/MS ( $m/z$ ):  $[\text{M}+\text{Na}]^+$  calcd. for  $\text{C}_{24}\text{H}_{34}\text{FNNaO}_{16}$ , 634.17593; found, 634.17656.

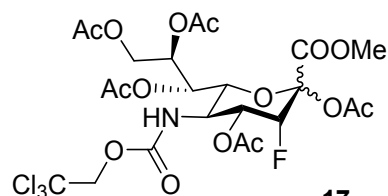

17

**Methyl 5-(2,2,2-trichloroethylcarbamado)-2,4,7,8,9-penta-O-acetyl-3,5-dideoxy-3-fluoro-D-glycero- $\beta$ -galacto-non-2-ulopyranosonate (17).** Boc inhibitor **12** (27 mg; 44  $\mu\text{mol}$ ) was dissolved in DCM (1 ml; 0.044 M) and TfOH (16  $\mu\text{l}$ ; 262  $\mu\text{m}$ ; 4 eq.) was added and stirred for 5 min at r.t. (TLC: (EtOAc:Hept, 60:40 v/v)  $R_f = 0.09$ ) TrocCl (31  $\mu\text{l}$ ; 221  $\mu\text{m}$ ; 5 eq.) and TEA (62  $\mu\text{l}$ ; 443  $\mu\text{m}$ ; 10 eq.) were added. The reaction was left stirring for 16 h at r.t., diluted with an excess of DCM washed successively with 0.1M HCl and sat.  $\text{NaHCO}_3$ . The

organic layer was dried over  $\text{MgSO}_4$ , filtered and concentrated *in vacuo*. Silicagel flash column chromatography (0%  $\rightarrow$  50% EtOAc in Hept) afforded **17** (5.2 mg; 66  $\mu\text{mol}$ ; 17%) as a white solid. **TLC:** (EtOAc)  $R_f = 0.85$ .  **$^1\text{H}$  NMR** (500 MHz,  $\text{CDCl}_3$ )  $\delta$  5.67 (ddd,  $J = 27.9, 11.1, 2.5$  Hz, 1H, H-4), 5.37 (dd,  $J = 6.3, 1.7$  Hz, 1H, H-7), 5.26 – 5.16 (m, 2H, NH, H-8), 4.97 (dd,  $J = 49.1, 2.5$  Hz, 1H, H3), 4.91 (d, 1H, CHH Troc), 4.53 (d,  $J = 12.1$  Hz, 1H, CHH Troc), 4.49 (dd,  $J = 12.6, 2.5$  Hz, 1H, H-9a), 4.29 (d,  $J = 10.4$  Hz, 1H, H-6), 4.23 (dd,  $J = 12.6, 5.6$  Hz, 1H, H-9b), 3.84 (s, 3H,  $\text{OCH}_3$ ), 3.83 – 3.78 (m, 1H, H-5), 2.18 – 2.17 (m, 6H,  $2\times\text{CH}_3$ , OAc), 2.17 (s, 3H,  $\text{CH}_3$ , OAc), 2.04 (s, 3H,  $\text{CH}_3$ , OAc), 2.04 (s, 3H,  $\text{CH}_3$ , OAc).  **$^{13}\text{C}$  NMR** (126 MHz,  $\text{CDCl}_3$ )  $\delta$  170.75 (CO), 170.56 (CO), 170.12 (CO), 169.87 (CO), 167.04 (CO), 164.93 (CO), 153.75 (CONH), 95.05 (d,  $J = 28.9$  Hz, C-2), 86.97 (d,  $J = 184.9$  Hz, C-3), 95.11 (CCl<sub>3</sub> Troc), 74.33 (CH<sub>2</sub> Troc), 70.99 (C-6), 70.50 (C-8), 67.85 (C-7), 67.62 (d,  $J = 17.5$  Hz, C-4), 61.84 (C-9), 53.50 ( $\text{OCH}_3$ ), 47.43 (C-5), 30.93 ( $\text{CH}_3$ , OAc), 20.79 ( $\text{CH}_3$ , OAc), 20.73 ( $\text{CH}_3$ , OAc), 20.65 ( $\text{CH}_3$ , OAc), 20.52 ( $\text{CH}_3$ , OAc).  **$^{19}\text{F}$  NMR** (470 MHz,  $\text{CDCl}_3$ )  $\delta$  -209.54 (dd,  $J = 49.1, 27.7$  Hz). **HR-ESI-TOF/MS** ( $m/z$ ):  $[\text{M}+\text{Na}]^+$  calcd. for  $\text{C}_{23}\text{H}_{29}\text{Cl}_3\text{FNNaO}_{15}$ , 706.04845; found, 706.04999.

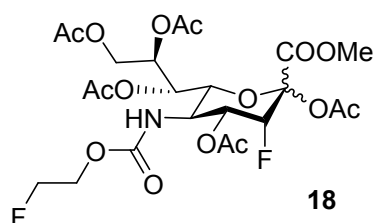

**18**

**Methyl 5-(2-fluoroethylcarbamado)-2,4,7,8,9-penta-O-acetyl-**

**3,5-dideoxy-3-fluoro-D-glycero- $\beta$ -galacto-non-2-ulopyranosonate (18).** Boc inhibitor **12** (27 mg; 44  $\mu\text{mol}$ ) was dissolved in DCM (1 ml; 0.044 M) and TfOH (16  $\mu\text{l}$ ; 262  $\mu\text{mol}$ ; 4 eq.) was added and stirred for 5 min at r.t. (**TLC:** (EtOAc:Hept, 60:40 v/v)  $R_f = 0.09$ ) 2-fluoroethyl chloroformate (21  $\mu\text{l}$ ; 221  $\mu\text{mol}$ ; 5 eq.) and TEA (62  $\mu\text{l}$ ; 443  $\mu\text{mol}$ ; 10 eq.) were added. The reaction was left stirring for 16 h at r.t., diluted with an excess of DCM washed successively with 0.1M HCl and sat.  $\text{NaHCO}_3$ . The organic layer was dried over  $\text{MgSO}_4$ , filtered and concentrated *in vacuo*. Silicagel flash column chromatography (0%  $\rightarrow$  50% EtOAc in Hept) afforded **18** (16 mg; 66  $\mu\text{mol}$ ; 60%) as a white solid. **TLC:** (EtOAc)  $R_f = 0.85$ .  **$^1\text{H}$  NMR** (500 MHz,  $\text{CDCl}_3$ )  $\delta$  5.51 (ddd,  $J = 27.9, 11.0, 2.5$  Hz, 1H, H-4), 5.40 (dd,  $J = 5.4, 2.0$  Hz, 1H, H-7), 5.17 (td,  $J = 5.9, 2.5$  Hz, 1H, H-8), 4.95 (dd,  $J = 49.1, 2.5$  Hz, 1H, H3), 4.94 (d,  $J = 9.4$  Hz, 1H, NH), 4.67 – 4.46 (m, 3H,  $\text{FCH}_2\text{CH}_2$ , H-9a), 4.41 – 4.24 (m, 2H  $\text{FCH}_2\text{CH}_2$ ), 4.25 – 4.16 (m, 2H, H-9b, H-6), 4.00 – 3.89 (m, 1H, H-5), 3.84 (s, 3H,  $\text{OCH}_3$ ), 2.18 (s, 3H,  $\text{CH}_3$ , OAc), 2.16 (s, 3H,  $\text{CH}_3$ , OAc), 2.12 (s, 3H,  $\text{CH}_3$ , OAc), 2.05 (s, 3H,  $\text{CH}_3$ , OAc), 2.04 (s, 3H,  $\text{CH}_3$ , OAc).  **$^{13}\text{C}$  NMR** (126 MHz,  $\text{CDCl}_3$ )  $\delta$  170.63 (CO), 170.48 (CO), 170.37 (CO), 170.12 (CO), 167.13 (CO), 165.04 (CO), 155.24 (CONH), 95.07 (d,  $J = 28.7$  Hz, C-2), 87.03 (d,  $J = 185.2$  Hz, C-3), 81.60 (d,  $J = 170.2$  Hz,  $\text{FCH}_2\text{CH}_2$ ), 71.91 (C-6), 71.00 (C-8), 68.21 (d,  $J = 17.3$  Hz, C-4), 67.96 (C-7), 64.29 (d,  $J = 19.9$  Hz,  $\text{FCH}_2\text{CH}_2$ ), 62.02 (C-9), 53.50 ( $\text{OCH}_3$ ), 47.05 (C-5), 20.83 ( $\text{CH}_3$ , OAc), 20.77 ( $\text{CH}_3$ , OAc), 20.75 ( $\text{CH}_3$ , OAc), 20.57 ( $\text{CH}_3$ , OAc), 20.54 ( $\text{CH}_3$ , OAc).  **$^{19}\text{F}$  NMR** (470 MHz,  $\text{CDCl}_3$ )  $\delta$  -209.07 (dd,  $J = 49.1, 27.9$  Hz). **HR-ESI-TOF/MS** ( $m/z$ ):  $[\text{M}+\text{Na}]^+$  calcd. for  $\text{C}_{23}\text{H}_{31}\text{F}_2\text{NNaO}_{15}$ , 622.15594; found, 622.15531.

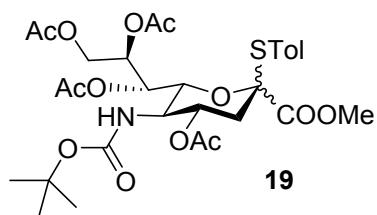

19

**Methyl 5-(tert-butoxycarbamado)-4,7,8,9-penta-O-acetyl-2,3,5-dideoxy-2-para-methylthiophenol-D-glycero- $\beta$ -galacto-non-2-ulopyranosonate (19).** As described previously<sup>8</sup>, thiocresol protected NBoc methyl ester sialic acid (8.39 g; 17.2 mmol) was dissolved in pyr (62 ml; 764 mmol; 44.4 eq.). Ac<sub>2</sub>O (36 ml; 382 mmol; 22.2 eq.) was slowly added. After stirring at r.t. for 7 h, the mixture was concentrated *in vacuo* using Tol for co-evaporation. The residue was dissolved in EtOAc and washed successively with HCl (0.1 M) and sat. aq. NaHCO<sub>3</sub>. The organic layer was dried over MgSO<sub>4</sub> and filtered and concentrated *in vacuo*. Silicagel flash column chromatography (0% → 50% EtOAc in Hept) afforded **19** (10.26 g; 15.6 mmol; 91%) as a white foam. **TLC:** (EtOAc:Hept, 50:50 v/v) R<sub>f</sub> = 0.47 **<sup>1</sup>H NMR** (500 MHz, CDCl<sub>3</sub>)  $\delta$  7.32 (d, *J* = 7.7 Hz, 2H, 2xCH, *meta* STol), 7.14 (d, *J* = 7.7 Hz, 2H, 2xCH, *ortho* STol), 5.55 (t, *J* = 2.6 Hz, 1H, H-7), 5.33 (td, *J* = 11.1, 4.8 Hz, 1H, H-4), 5.01 (dt, *J* = 8.5, 2.5 Hz, 1H, H-8), 4.55 (dd, *J* = 10.5, 2.6 Hz, 1H, H-6), 4.51 (dd, *J* = 12.2, 2.3 Hz, 1H, H-9<sub>a</sub>), 4.45 (d, *J* = 10.7 Hz, 1H, NH), 4.04 (dd, *J* = 12.2, 8.5 Hz, 1H, H-9<sub>b</sub>), 3.79 (q, *J* = 10.6 Hz, 1H, H-5), 3.61 (s, 3H, OCH<sub>3</sub>), 2.67 (dd, *J* = 13.8, 4.8 Hz, 1H, H-3<sub>eq</sub>), 2.34 (s, 3H, CH<sub>3</sub>,STol), 2.10 (s, 3H, CH<sub>3</sub>,OAc), 2.08 (s, 3H, CH<sub>3</sub>,OAc), 2.04 (s, 4H, H-3<sub>ax</sub>; CH<sub>3</sub>,OAc), 1.97 (s, 3H, CH<sub>3</sub>,OAc), 1.40 (s, 9H, <sup>t</sup>Bu, Boc). **<sup>13</sup>C NMR** (126 MHz, CDCl<sub>3</sub>)  $\delta$  170.98 (CO, OAc), 170.61 (CO, OAc), 170.43 (CO, OAc), 169.93 (CO, OAc), 168.48 (C-1), 155.35 (CO, Boc), 140.22 (C-CH<sub>3</sub>,STol) 136.38 (2xCH, *meta* STol), 129.99 (2xCH *ortho* STol), 125.41 (C-S, STol), 88.87 (C-2), 80.29 (C(CH<sub>3</sub>)<sub>3</sub>, Boc), 73.34 (C-6), 72.90 (C-8), 69.51 (C-4), 69.12 (C-7), 62.92 (C-9), 52.68 (OCH<sub>3</sub>), 50.96 (C-5), 37.59 (C-3), 28.28 (<sup>t</sup>Bu, Boc), 21.44 (CH<sub>3</sub>,STol), 21.21 (CH<sub>3</sub>,OAc), 20.94 (CH<sub>3</sub>,OAc), 20.83 (CH<sub>3</sub>,OAc), 20.82 (CH<sub>3</sub>,OAc). **HR-ESI-TOF/MS** (*m/z*): [M+Na]<sup>+</sup> calcd. for C<sub>30</sub>H<sub>41</sub>NNaO<sub>13</sub>S, 678.21963; found, 678.21799.

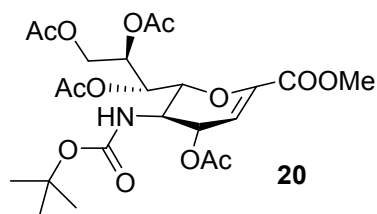

20

**methyl 5-(tert-butoxycarbamado)-4,7,8,9-tetra-O-acetyl-2,6-anhydro-3,5-dideoxy-D-glycero-D-galacto-non-2-enonate (20).** To a solution of **19** (2.757 g; 4.22 mmol) in DCM (42.2 ml; 0.1 M), slowly Br<sub>2</sub> (0.239 ml; 4.64 mmol; 1.1 eq.) was added. After 2.5 h stirring at r.t., the reaction was diluted with DCM and washed with 10% Na<sub>2</sub>S<sub>2</sub>O<sub>3</sub>. The milky organic layer was dried over MgSO<sub>4</sub>, filtered and the clear filtrate was extracted once more with 10% Na<sub>2</sub>S<sub>2</sub>O<sub>3</sub> aq. before drying over MgSO<sub>4</sub>, filtering. The filtrate was concentrated *in vacuo*, redissolved in DCM (42.0 ml; 0.1 M) and TEA (1.699 g; 16.79 mmol; 4 eq.) was added. The reaction was stirred 16 h at r.t. and concentrated *in vacuo*. The residue was dissolved in EtOAc and washed successively with HCl (0.1 M) and sat. aq. NaHCO<sub>3</sub>. The organic layer was dried over MgSO<sub>4</sub>, filtered and again concentrated *in vacuo*. Silicagel flash column chromatography (0% → 45% EtOAc in Hept) afforded **20** (1.734 g; 3.26 mmol; 78% *two steps*) as a white solid. **TLC:** (EtOAc:Hept, 60:40 v/v) R<sub>f</sub> = 0.62 **<sup>1</sup>H NMR** (500 MHz, CDCl<sub>3</sub>)  $\delta$  5.99 (d, *J* = 3.1 Hz, 1H, H-3), 5.55 (t, *J* = 4.3 Hz, 1H, H-7), 5.47 (dd, *J* = 7.5, 3.1 Hz, 1H, H-4), 5.37 (ddd, *J* = 6.8, 4.9, 3.4 Hz, 1H, H-8), 4.65 (d, *J* = 9.9 Hz, 1H, NH), 4.60 (dd, *J* = 12.3, 3.4 Hz, 1H, H-9<sub>a</sub>), 4.33 (dd, *J* = 9.0, 3.8 Hz, 1H, H-6), 4.19 (dd, *J* = 12.2, 6.8 Hz, 1H, H-9<sub>b</sub>), 4.09 (q, *J* = 8.9 Hz, 1H, H-5), 3.80 (s, 3H,

OCH<sub>3</sub>), 2.13 (s, 3H, CH<sub>3</sub>,OAc), 2.08 (s, 3H, CH<sub>3</sub>,OAc), 2.06 (s, 3H, CH<sub>3</sub>,OAc), 1.41 (s, 9H, <sup>t</sup>Bu, Boc). <sup>13</sup>C NMR (126 MHz, CDCl<sub>3</sub>) δ 170.73 (CO, Ac), 170.68 (CO, Ac), 170.05 (CO, Ac), 169.91 (CO, Ac), 161.78 (C-1), 154.98 (CO, Boc), 145.15 (C-2), 108.11 (C-3), 80.57 (C(CH<sub>3</sub>)<sub>3</sub>, Boc), 76.94 (C-6), 70.58 (C-8), 68.60 (C-4), 67.92 (C-7), 62.10 (C-9), 52.66 (OCH<sub>3</sub>), 48.01 (C-5), 28.27 (<sup>t</sup>Bu, Boc), 20.96 (CH<sub>3</sub>,OAc), 20.91 (CH<sub>3</sub>,OAc), 20.85 (CH<sub>3</sub>,OAc), 20.80 (CH<sub>3</sub>,OAc). **HR-ESI-TOF/MS** (*m/z*): [M+Na]<sup>+</sup> calcd. for C<sub>23</sub>H<sub>33</sub>NNaO<sub>13</sub>, 554.18496; found, 554.18611.

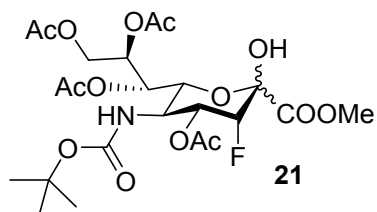

**Methyl 5-(tert-butoxycarbamido)-4,7,8,9-penta-O-acetyl-3,5-dideoxy-3-fluoro-D-glycero-β-galacto-non-2-ulopyranosonate (21).** To a solution of **20** (1.724 g; 3.24 mmol) in a 1:3 mixture of H<sub>2</sub>O and DMF (32 ml; 0.1 M), Selectfluor (3.45 g; 9.73 mmol; 3 eq.) was added. The reaction was stirred at 60 °C for 3 h. The mixture was quenched with sat. aq. NaHCO<sub>3</sub> and concentrated *in vacuo*- even though conversion was incomplete. The residue was dissolved in EtOAc and washed successively with HCl (0.1M) and sat. aq. NaHCO<sub>3</sub>. The organic layer was dried over MgSO<sub>4</sub>, filtered and concentrated *in vacuo*. Silicagel flash column chromatography (0% → 50% EtOAc in Hept) afforded **21** (789 mg; 1.39 mmol; 72% based on recovery of starting material) as a white foam. **TLC:** (EtOAc:Hept, 60:40 v/v) R<sub>f</sub> = 0.47 **<sup>1</sup>H NMR** (500 MHz, CDCl<sub>3</sub>) δ 5.52 (s, 1H, OH), 5.47 (dd, *J* = 4.4, 2.3 Hz, 1H, H-7), 5.37 – 5.23 (m, 2H, H-8; H-4), 4.94 (d, *J* = 10.3 Hz, 1H, NH), 4.92 (dd, *J* = 49.8, 2.1 Hz, 1H, H-3), 4.81 (dd, *J* = 12.3, 2.5 Hz, 1H, H-9<sub>a</sub>), 4.26 (dd, *J* = 10.6, 2.3 Hz, 1H, H-6), 4.18 – 4.08 (m, 2H, H-5; H-9<sub>b</sub>), 3.85 (s, 3H, OCH<sub>3</sub>), 2.16 (s, 3H, CH<sub>3</sub>,OAc), 2.09 (s, 3H, CH<sub>3</sub>,OAc), 2.09 (s, 3H, CH<sub>3</sub>,OAc), 2.04 (s, 3H, CH<sub>3</sub>,OAc), 1.40 (s, 9H, <sup>t</sup>Bu, Boc). <sup>13</sup>C NMR (126 MHz, CDCl<sub>3</sub>) δ 171.68 (CO, Ac), 171.48 (CO, Ac), 170.60 (CO, Ac), 170.19 (CO, Ac), 167.70 (C-1), 155.22 (CO, Boc), 94.45 (d, *J* = 25.5 Hz, C-2), 87.06 (d, *J* = 185.1 Hz, C-3), 80.09 (C(CH<sub>3</sub>)<sub>3</sub>, Boc), 71.91 (C-8), 71.46 (C-6), 69.96 (d, *J* = 17.3 Hz, C-4), 68.63 (C-7), 63.01 (C-9), 53.50 (OCH<sub>3</sub>), 46.36 (C-5), 28.31 (<sup>t</sup>Bu, Boc), 21.13 (CH<sub>3</sub>,OAc), 20.99 (CH<sub>3</sub>,OAc), 20.85 (CH<sub>3</sub>,OAc), 20.78 (CH<sub>3</sub>,OAc). **HR-ESI-TOF/MS** (*m/z*): [M+Na]<sup>+</sup> calcd. for C<sub>23</sub>H<sub>34</sub>FNNaO<sub>14</sub>, 590.18610; found, 590.18498.

## References and Notes

1. Kuhn, B.; Benz, J.; Greif, M.; Engel, A. M.; Sobek, H.; Rudolph, M. G., The structure of human alpha-2,6-sialyltransferase reveals the binding mode of complex glycans. *Acta crystallographica. Section D, Biological crystallography* **2013**, *69* (Pt 9), 1826-38.
2. Volkers, G.; Worrall, L. J.; Kwan, D. H.; Yu, C. C.; Baumann, L.; Lameignere, E.; Wasney, G. A.; Scott, N. E.; Wakarchuk, W.; Foster, L. J.; Withers, S. G.; Strynadka, N. C., Structure of human ST8SialII sialyltransferase provides insight into cell-surface polysialylation. *Nat Struct Mol Biol* **2015**, *22* (8), 627-35.
3. Krapp, S.; Munster-Kuhnel, A. K.; Kaiser, J. T.; Huber, R.; Tiralongo, J.; Gerardy-Schahn, R.; Jacob, U., The crystal structure of murine CMP-5-N-acetylneuraminic acid synthetase. *Journal of molecular biology* **2003**, *334* (4), 625-37.
4. ULC, C. C. G. *Molecular Operating Environment (MOE). 2013.08 ed.*, Chemical Computing Group Inc.: 1010 Sherbooke St. West, Suite #910, Montreal, QC, Canada, H3A 2R7, 2013.
5. Case, D. A.; Darden, T. A.; Cheatham, T. E.; Simmerling, C. L.; Wang, J.; Duke, R. E.; Luo, R.; Walker, R. C.; Zhang, W.; Merz, K. M.; Roberts, B.; Hayik, S.; Roitberg, A.; Seabra, G.; Swails, J.; Götz, A. W.; Kolossváry, I.; Wong, K. F.; Paesani, F.; Vanicek, J.; Wolf, R. M.; Liu, J.; Wu, X.; Brozell, S. R.; Steinbrecher, T.; Gohlke, H.; Cai, Q.; Ye, X.; Wang, J.; Hsieh, M.-J.; Cui, G.; Roe, D. R.; Mathews, D. H.; Seetin, M. G.; Salomon-Ferrer, R.; Sagui, C.; Babin, V.; Luchko, T.; Gusarov, S.; Kovalenko, A.; Kollman, P. A., AMBER 12. **2012**.
6. Pettersen, E. F.; Goddard, T. D.; Huang, C. C.; Couch, G. S.; Greenblatt, D. M.; Meng, E. C.; Ferrin, T. E., UCSF Chimera--a visualization system for exploratory research and analysis. *Journal of computational chemistry* **2004**, *25* (13), 1605-12.
7. Rillahan, C. D.; Antonopoulos, A.; Lefort, C. T.; Sonon, R.; Azadi, P.; Ley, K.; Dell, A.; Haslam, S. M.; Paulson, J. C., Global metabolic inhibitors of sialyl- and fucosyltransferases remodel the glycome. *Nature chemical biology* **2012**, *8* (7), 661-668.
8. Büll, C.; Heise, T.; Beurskens, D. M. H.; Riemersma, M.; Ashikov, A.; Rutjes, F. P. J. T.; van Kuppevelt, T. H.; Lefeber, D. J.; den Brok, M. H.; Adema, G. J.; Boltje, T. J., Sialic Acid Glycoengineering Using an Unnatural Sialic Acid for the Detection of Sialoglycan Biosynthesis Defects and On-Cell Synthesis of Siglec Ligands. *ACS Chemical Biology* **2015**, *10* (10), 2353-2363.

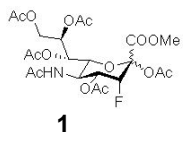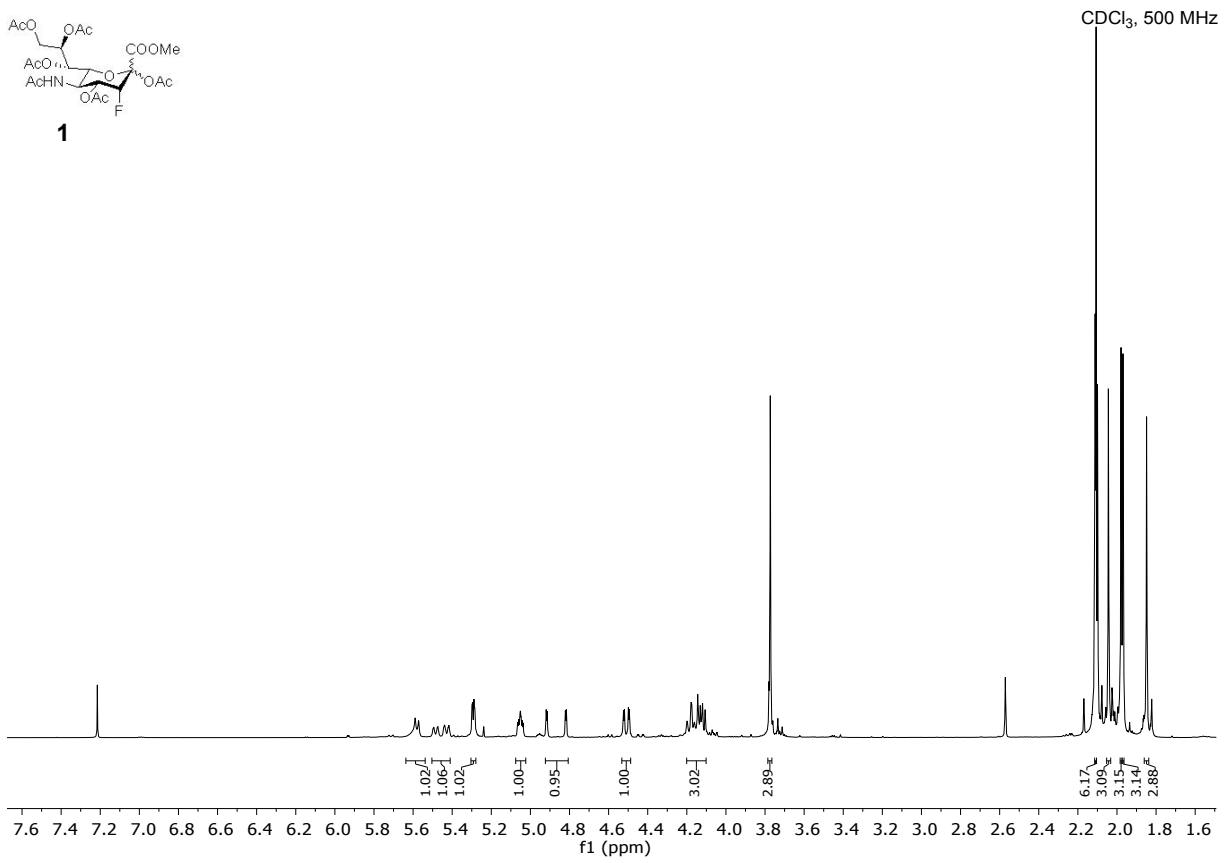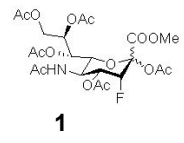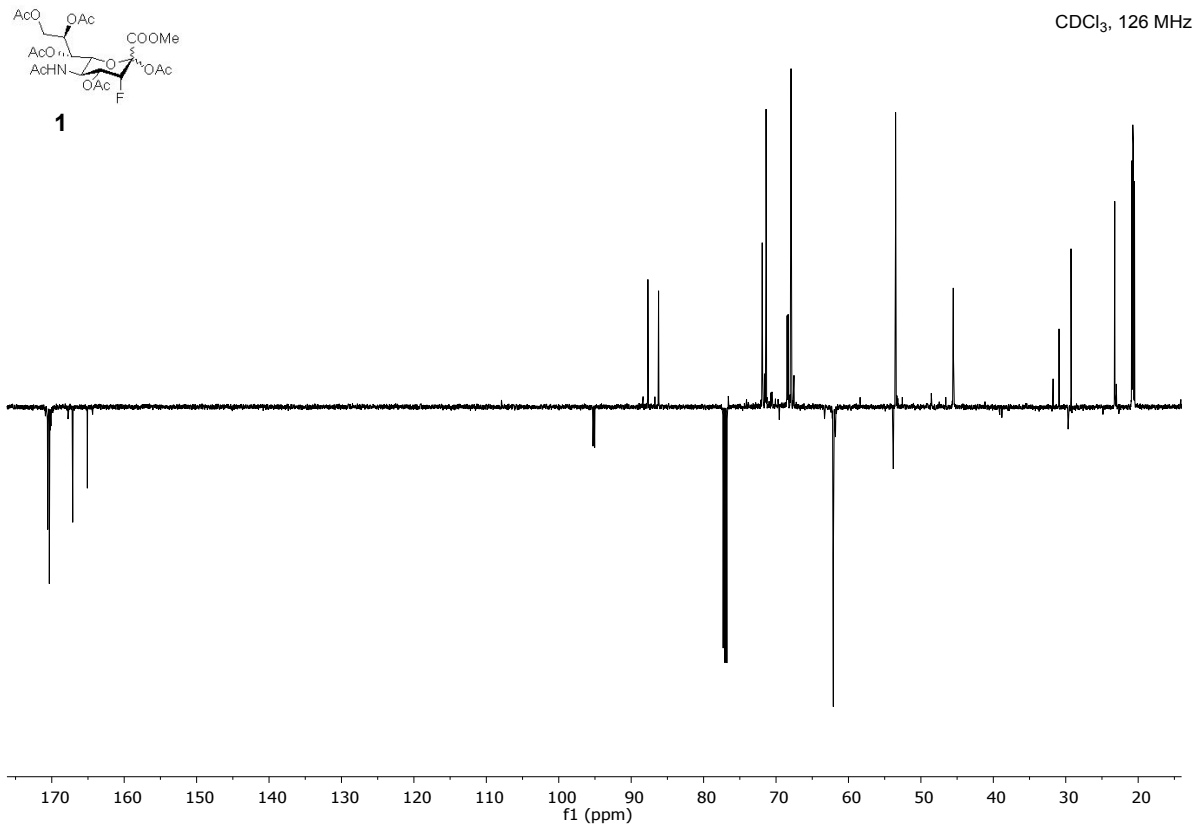

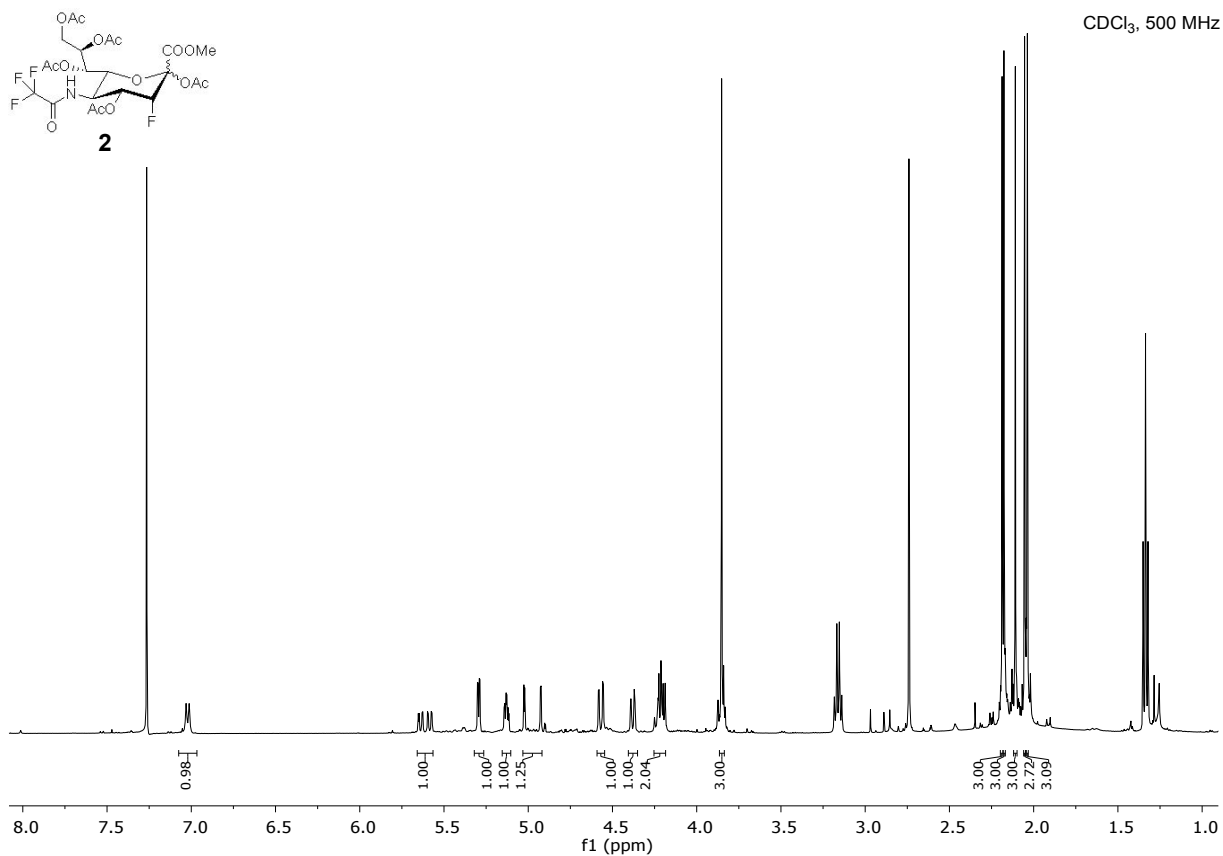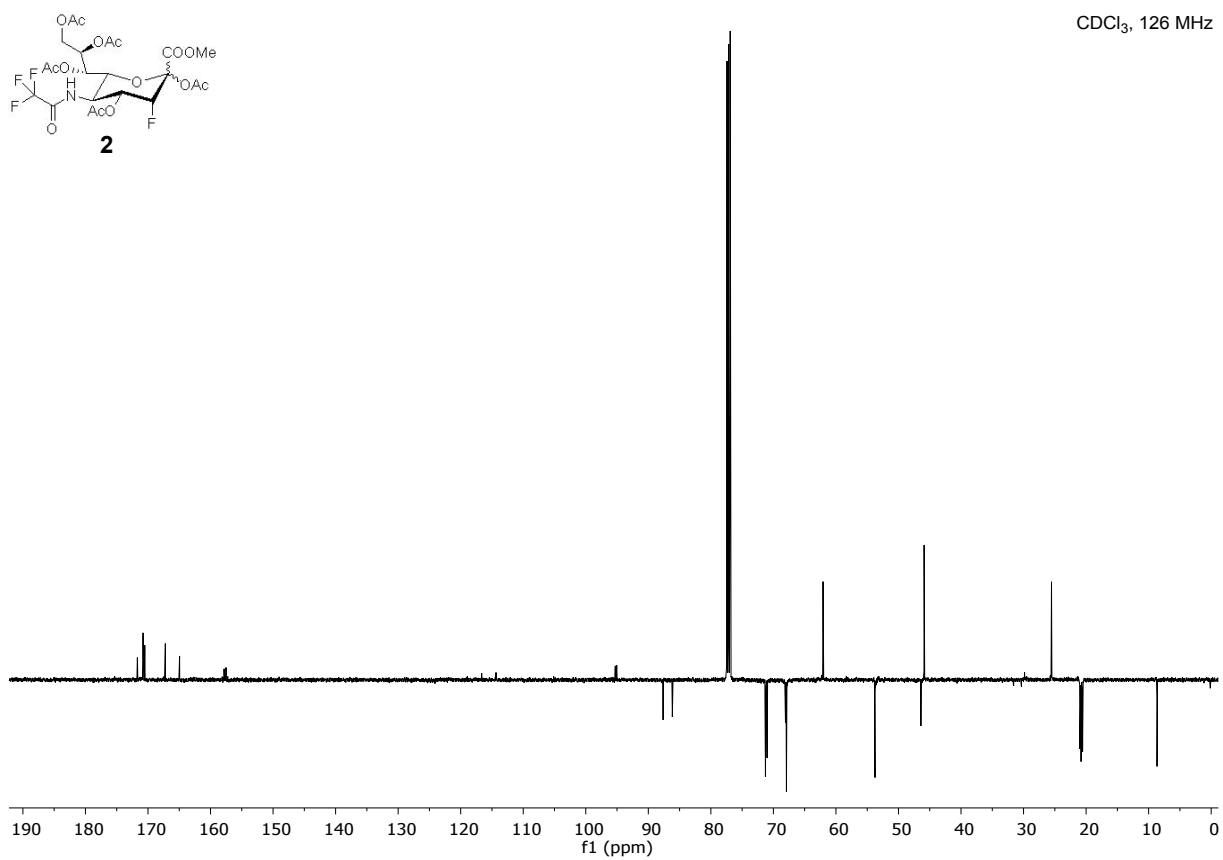



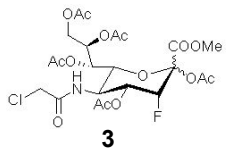

CDCl<sub>3</sub>, 500 MHz

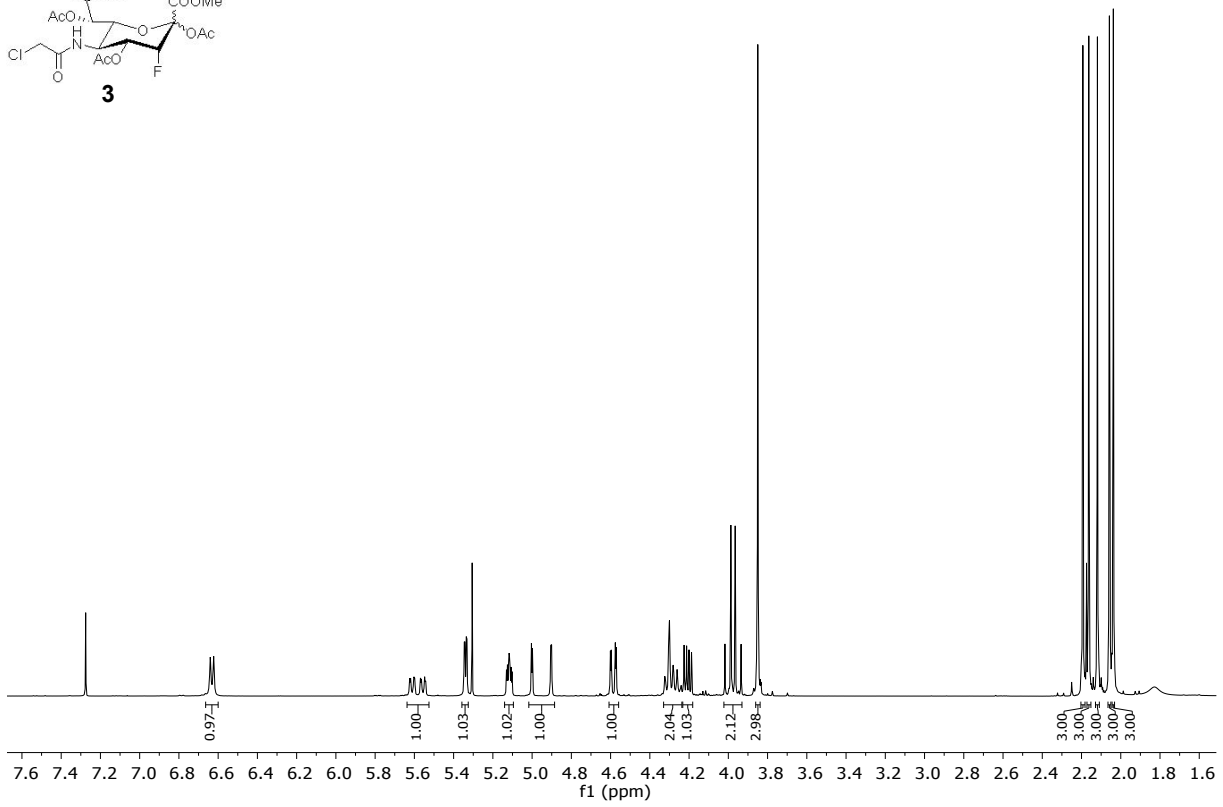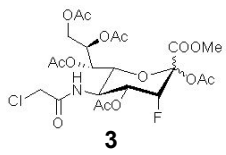

CDCl<sub>3</sub>, 126 MHz

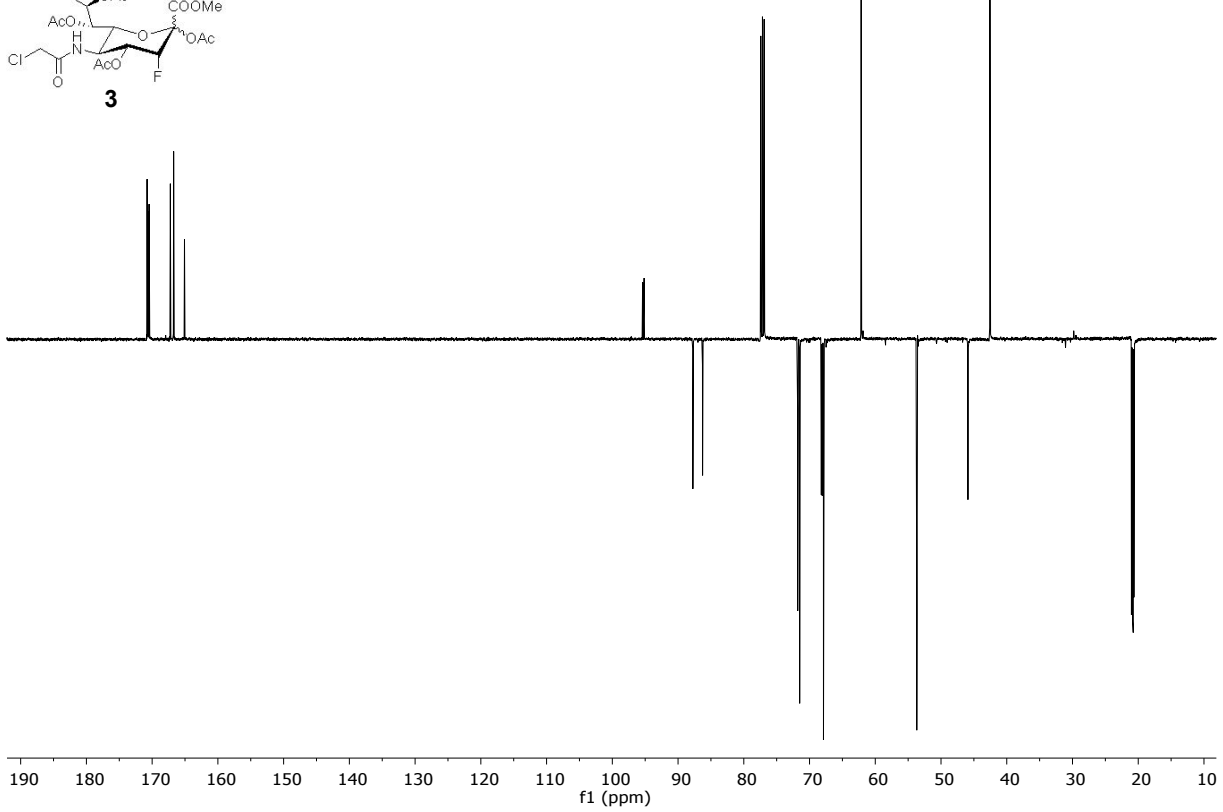

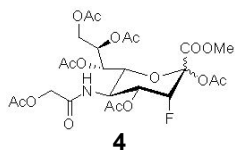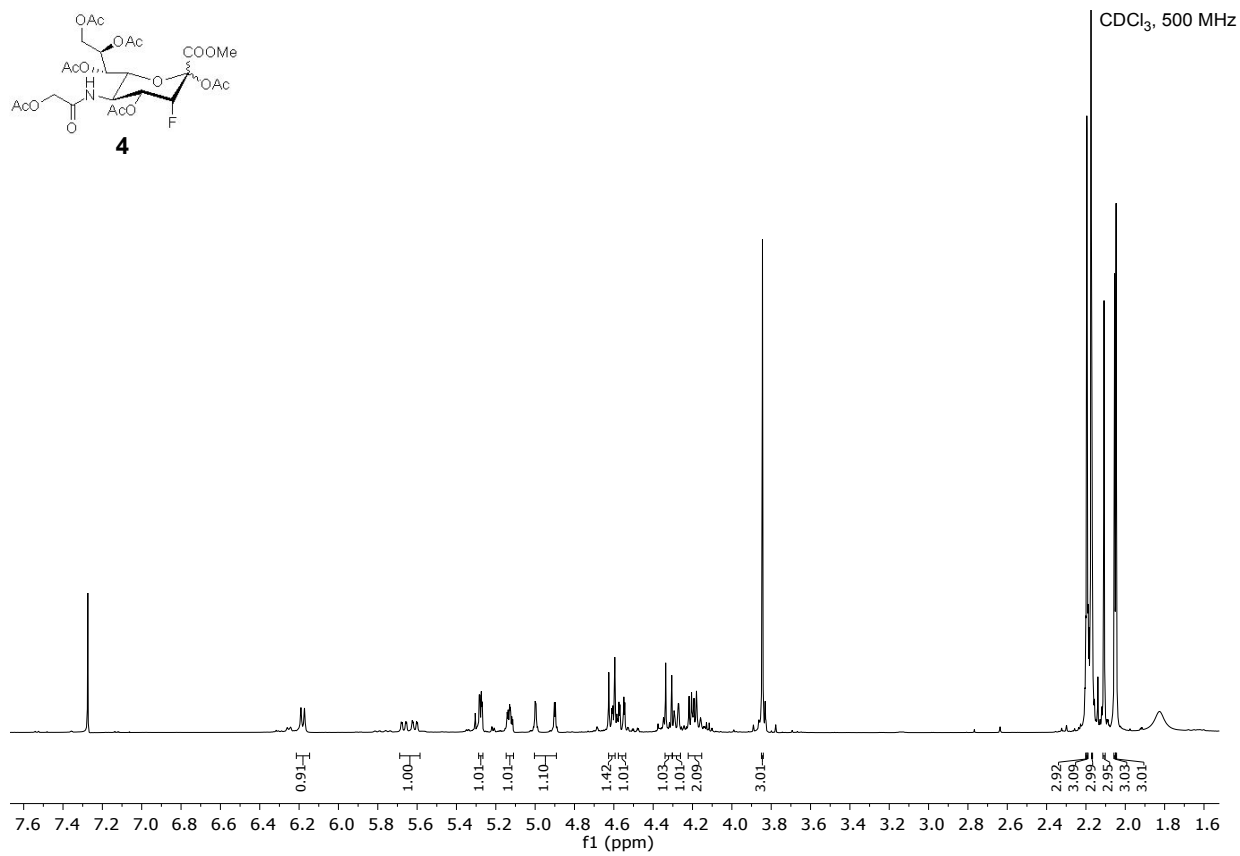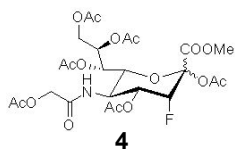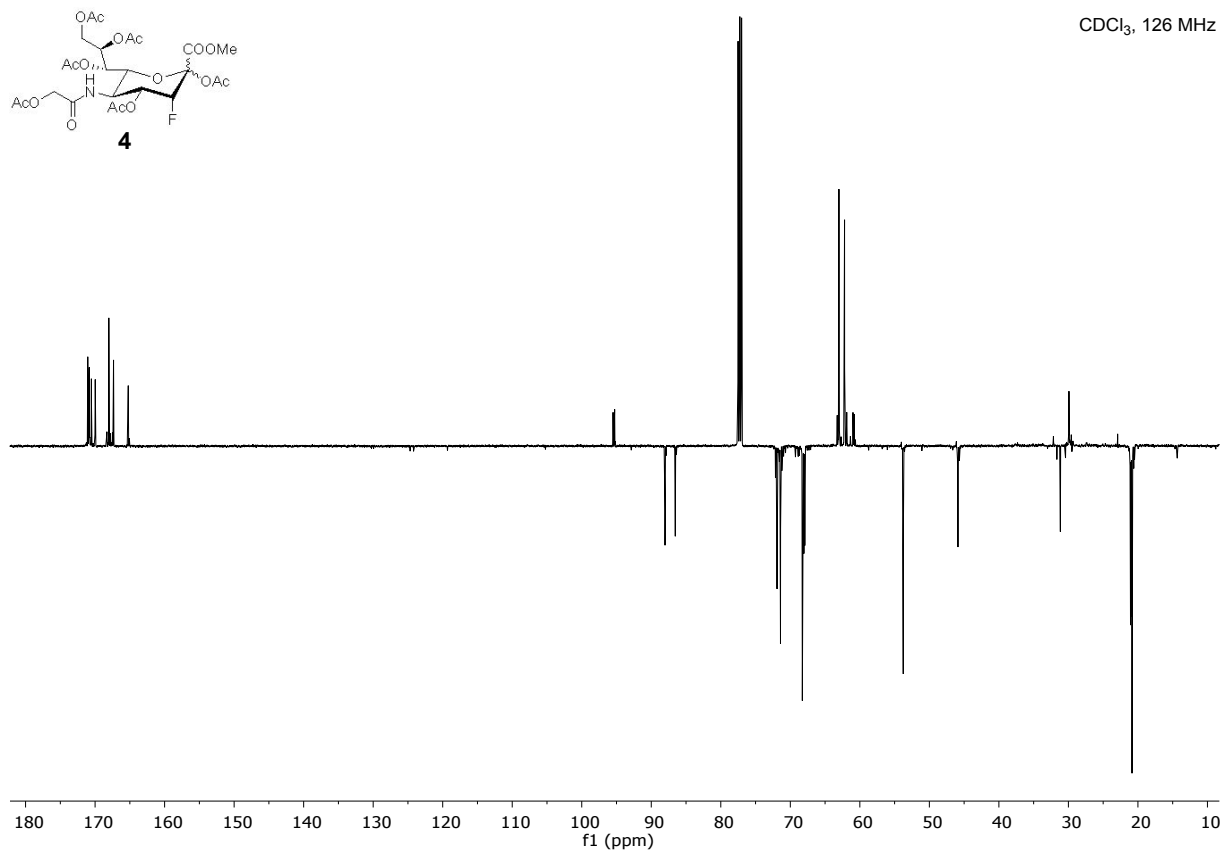

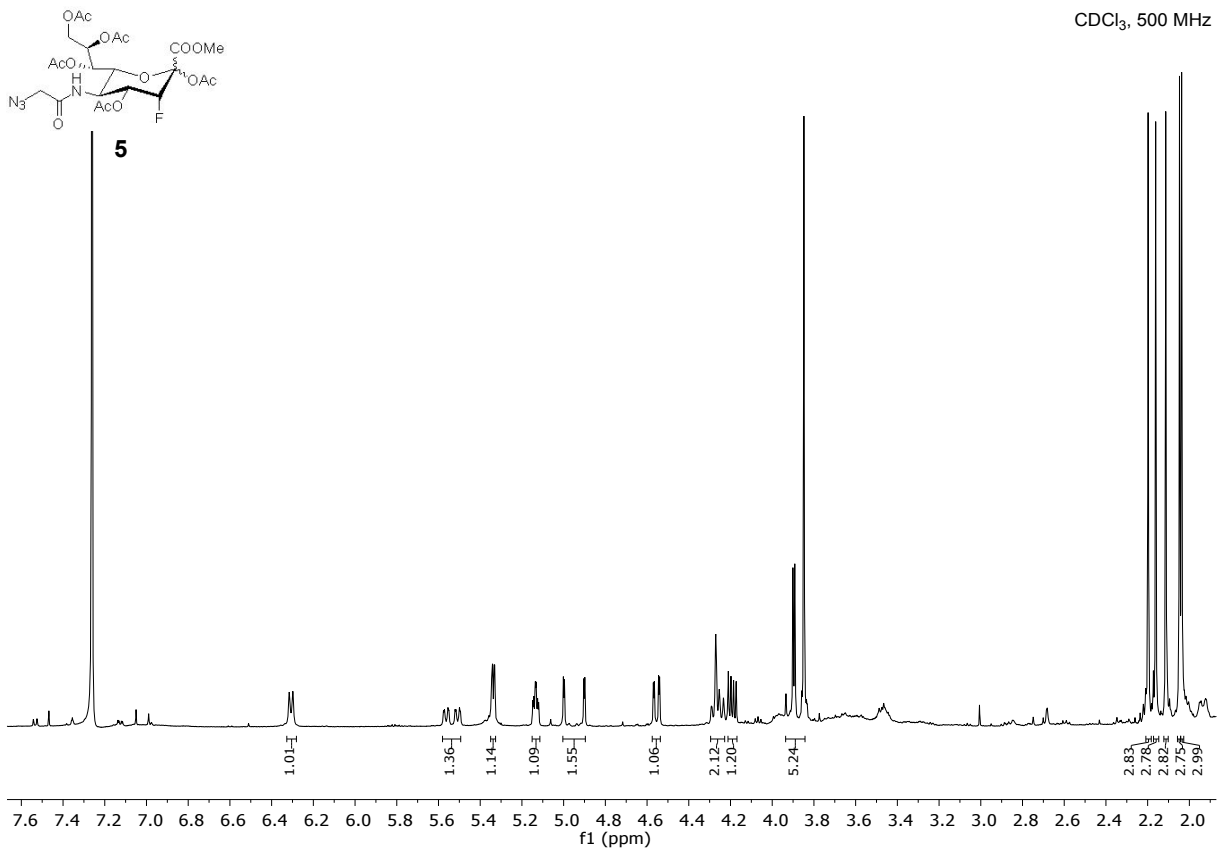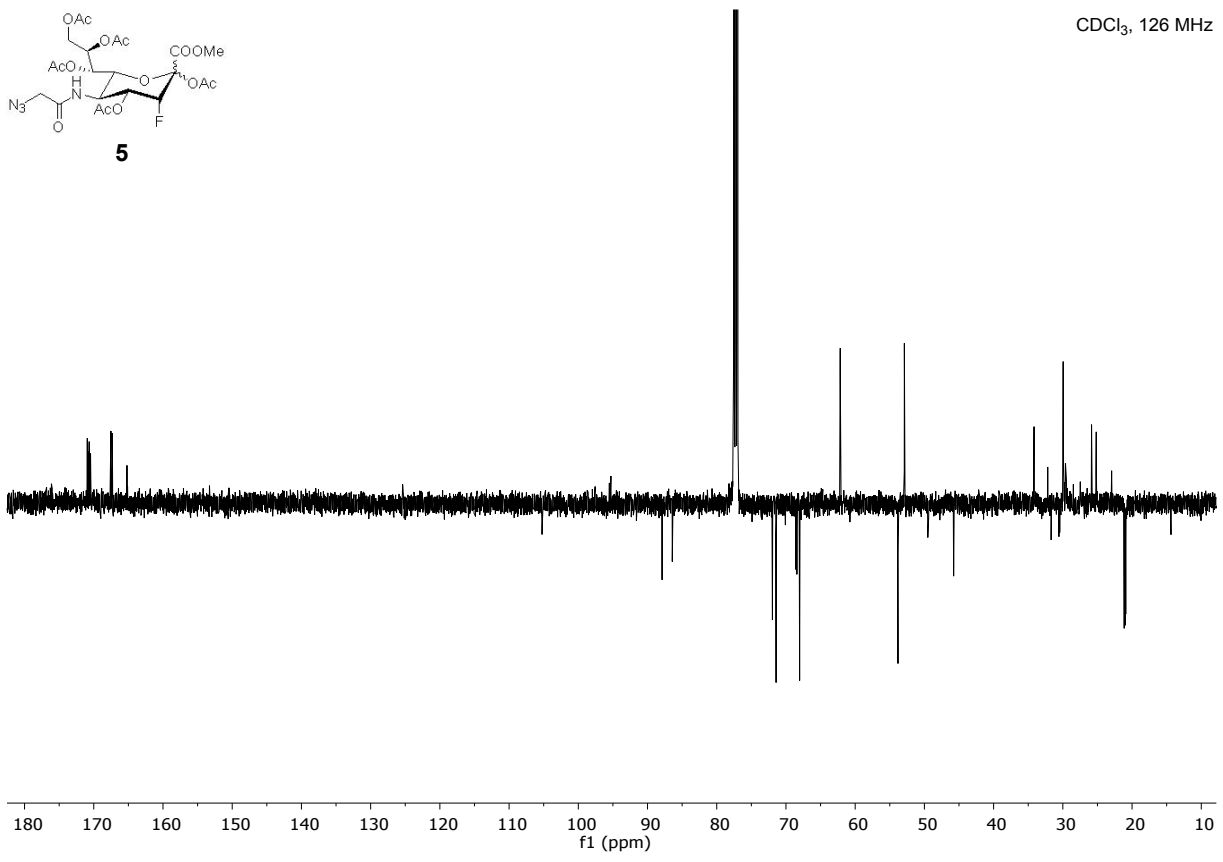

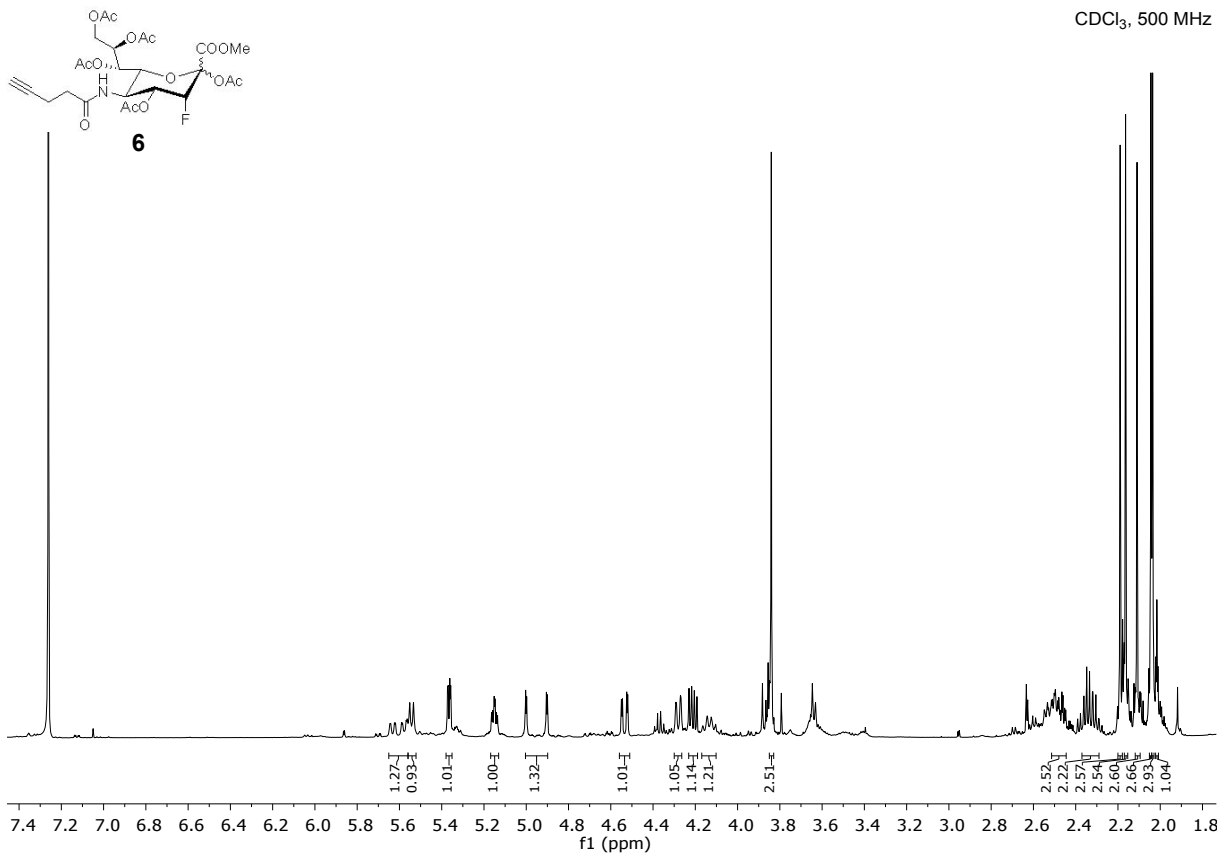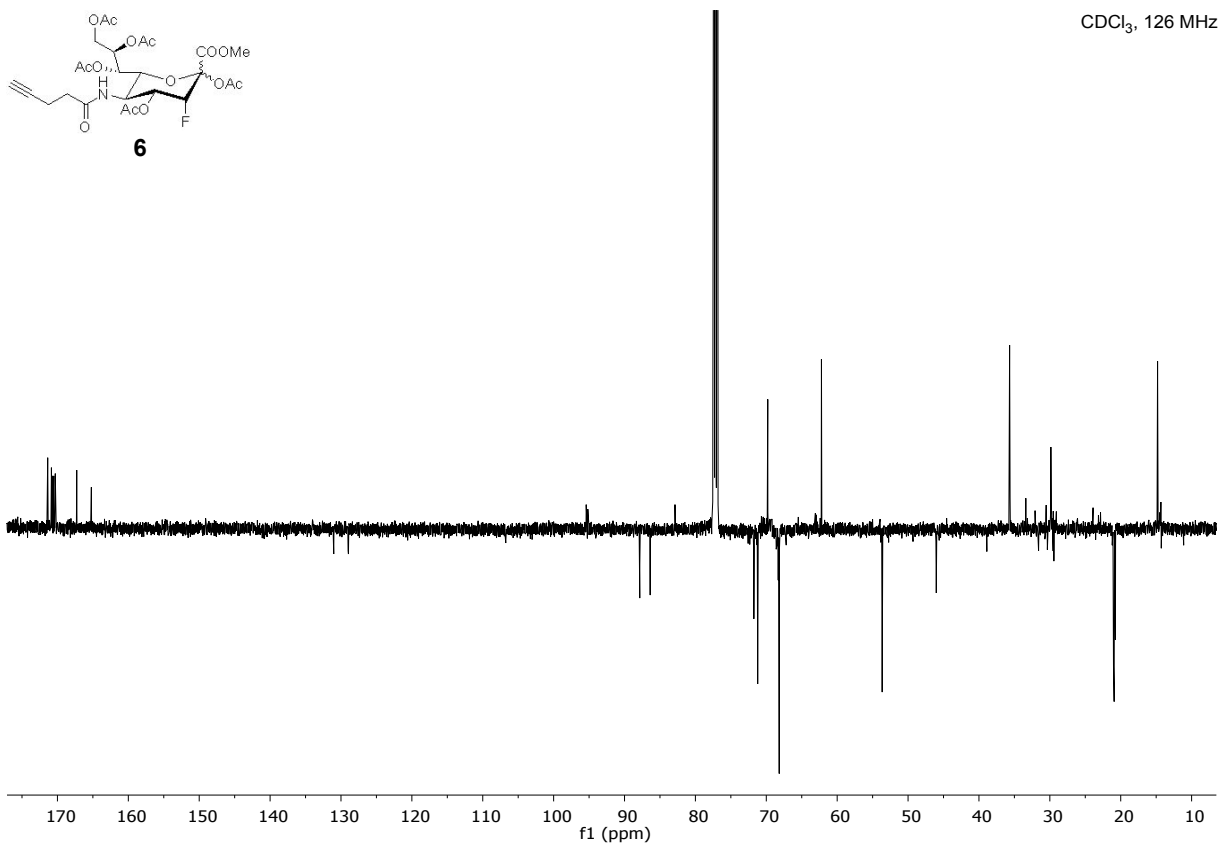

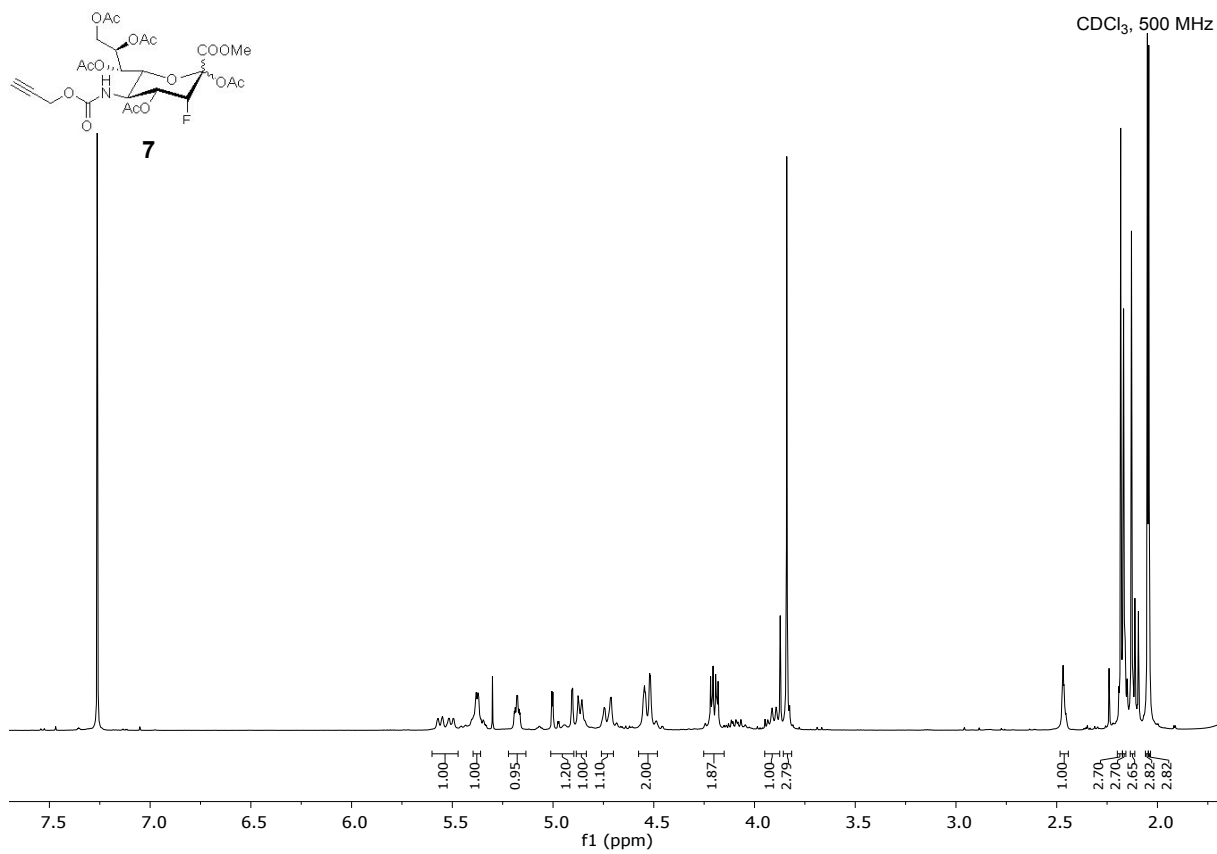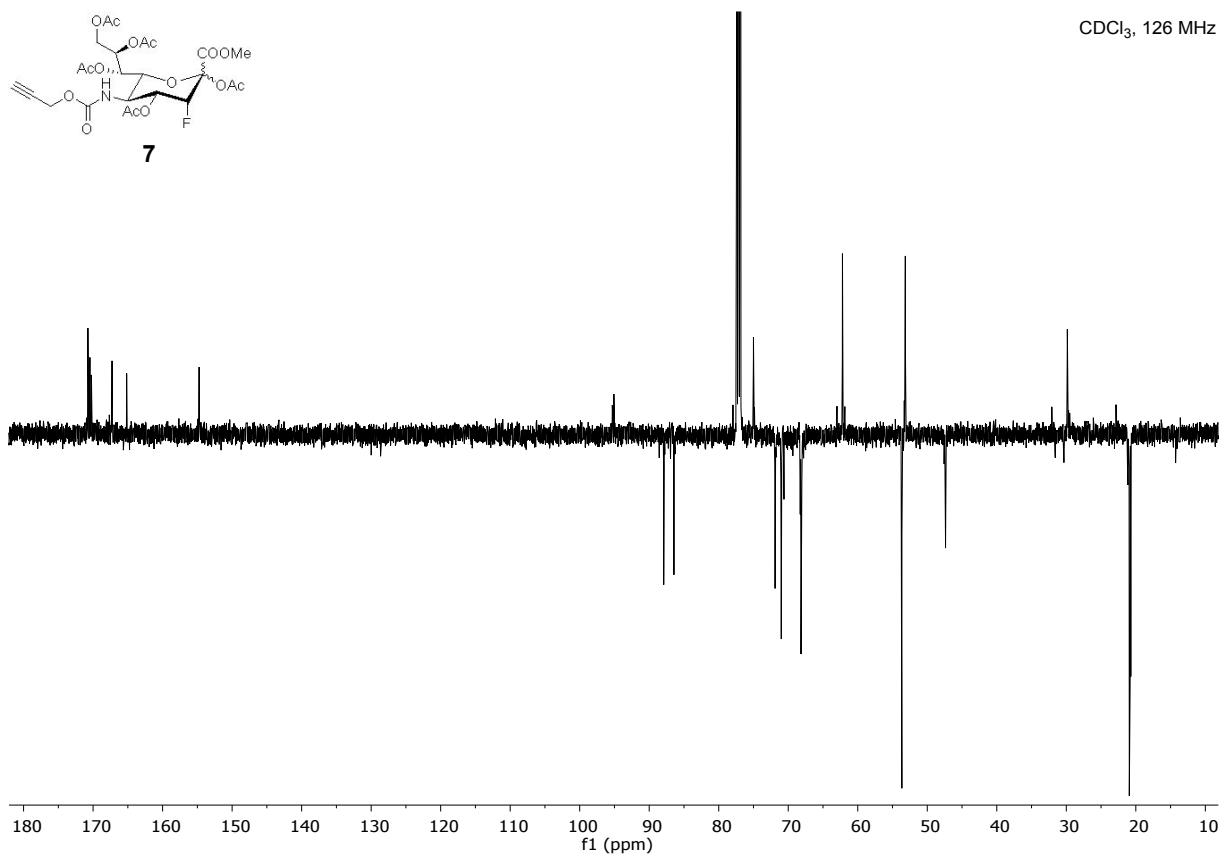

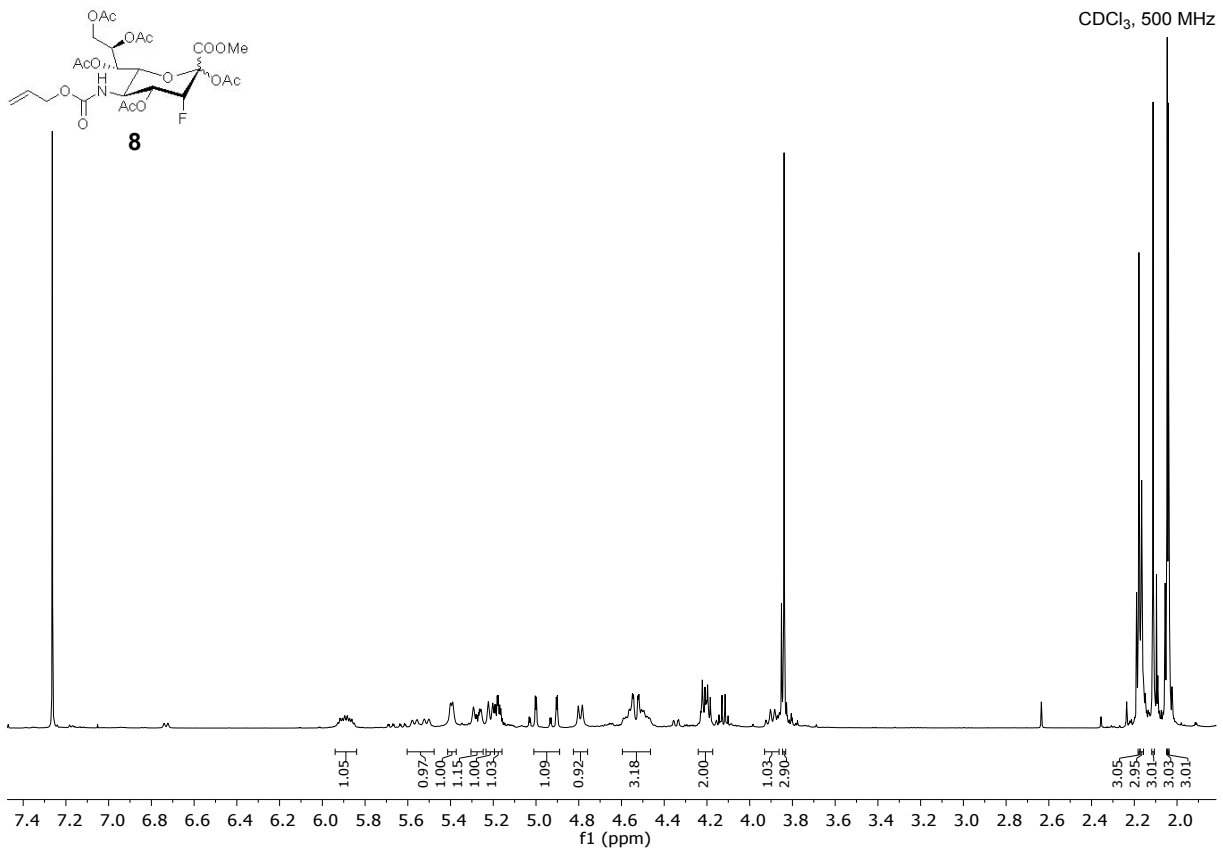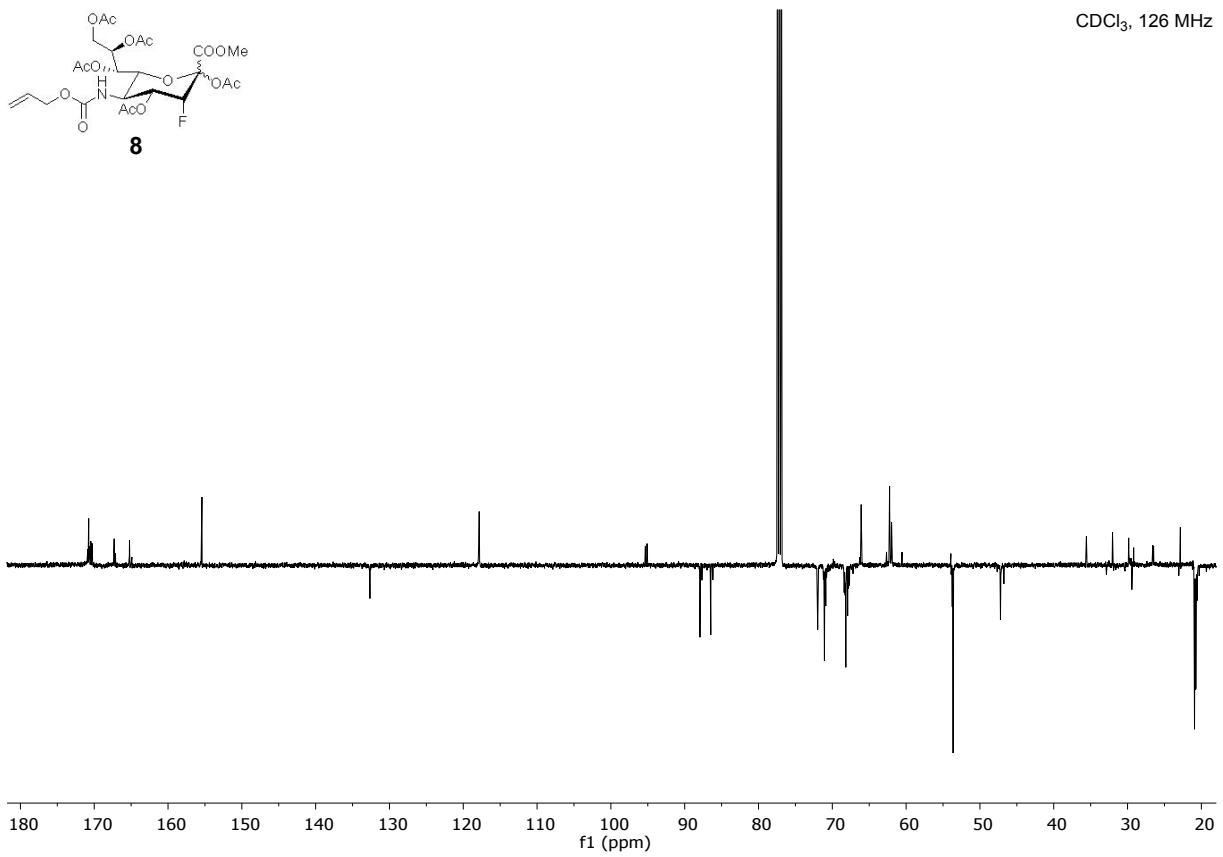

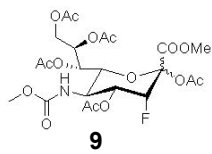

CDCl<sub>3</sub>, 400 MHz

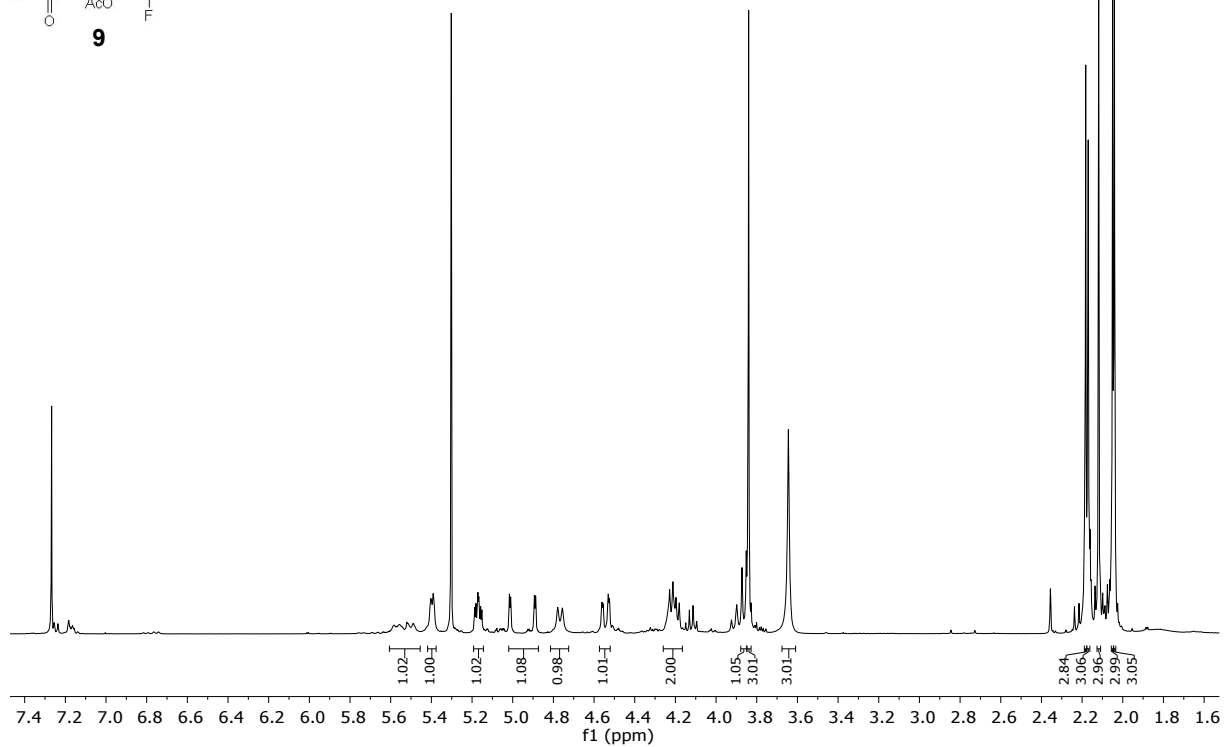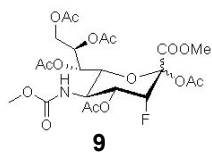

CDCl<sub>3</sub>, 101 MHz

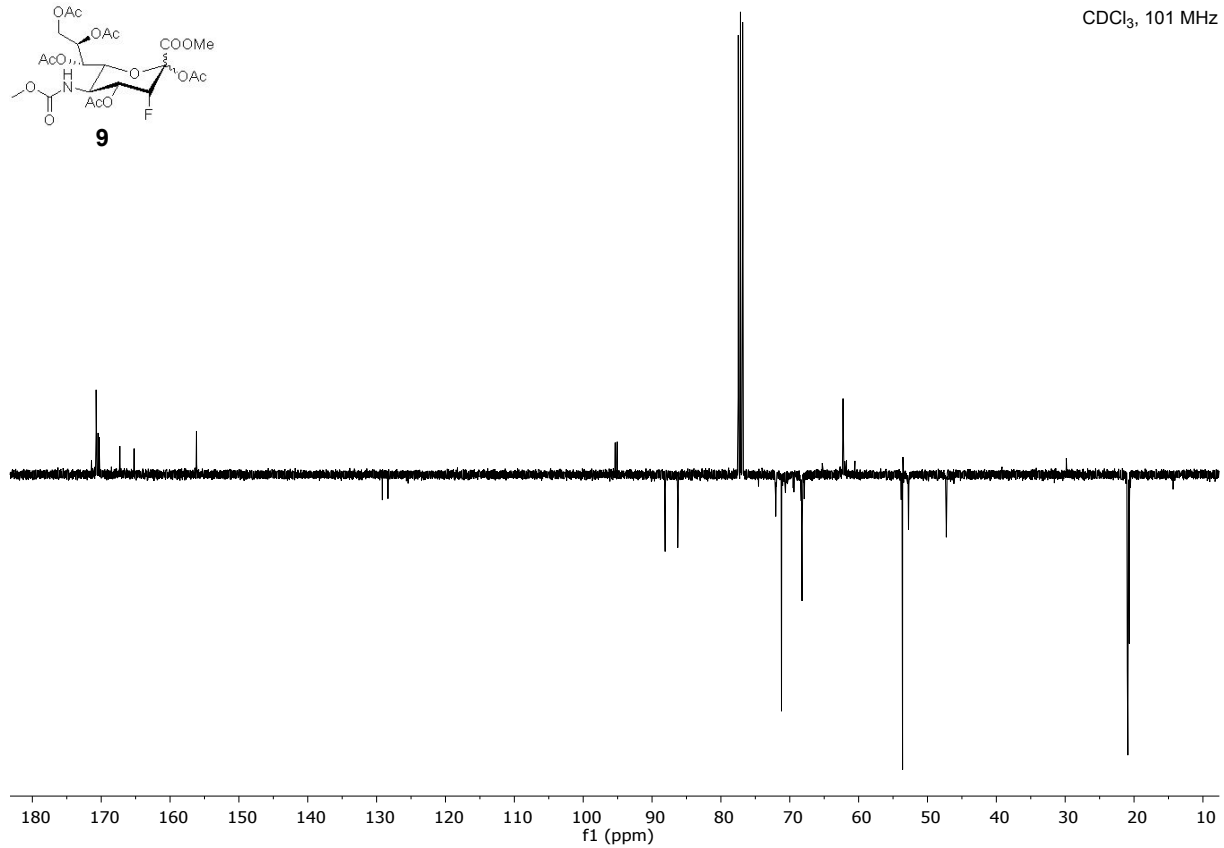

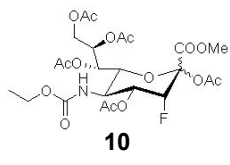

CDCl<sub>3</sub>, 400 MHz

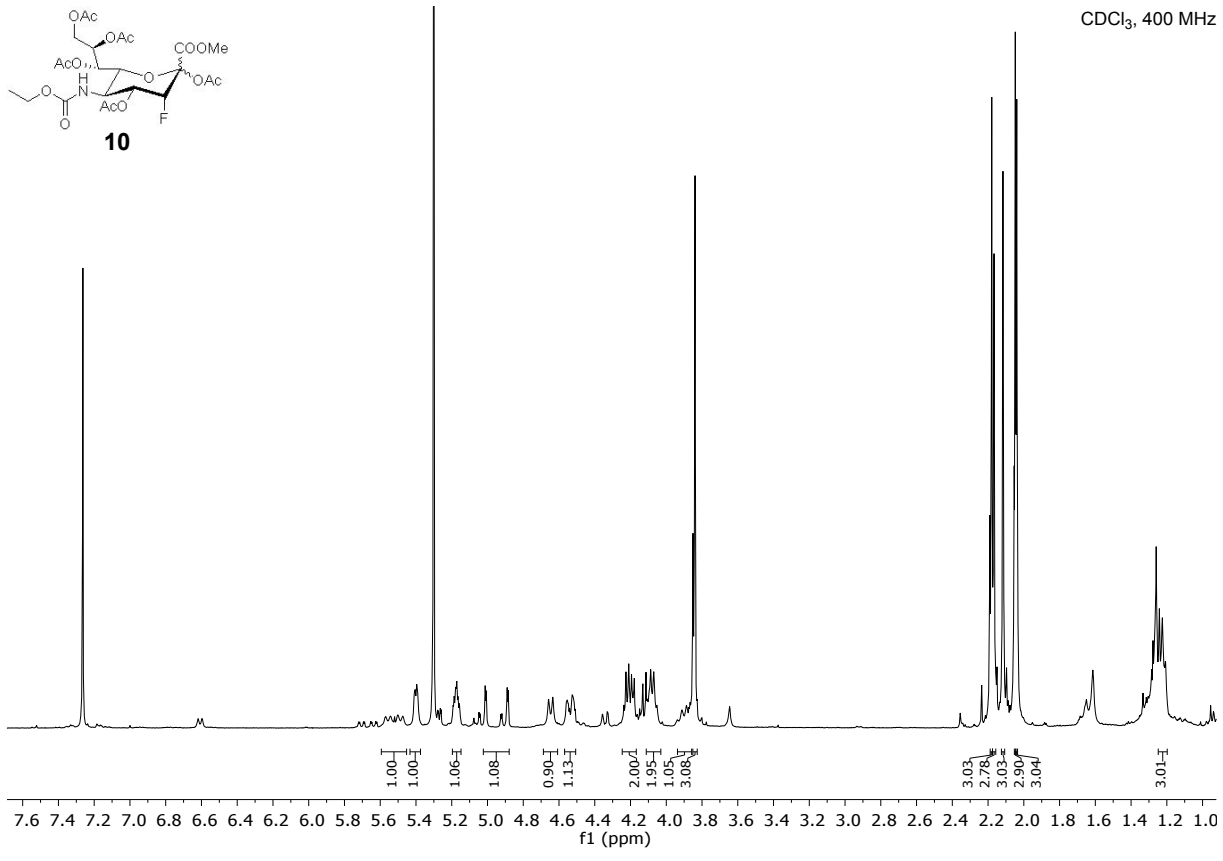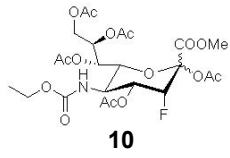

CDCl<sub>3</sub>, 101 MHz

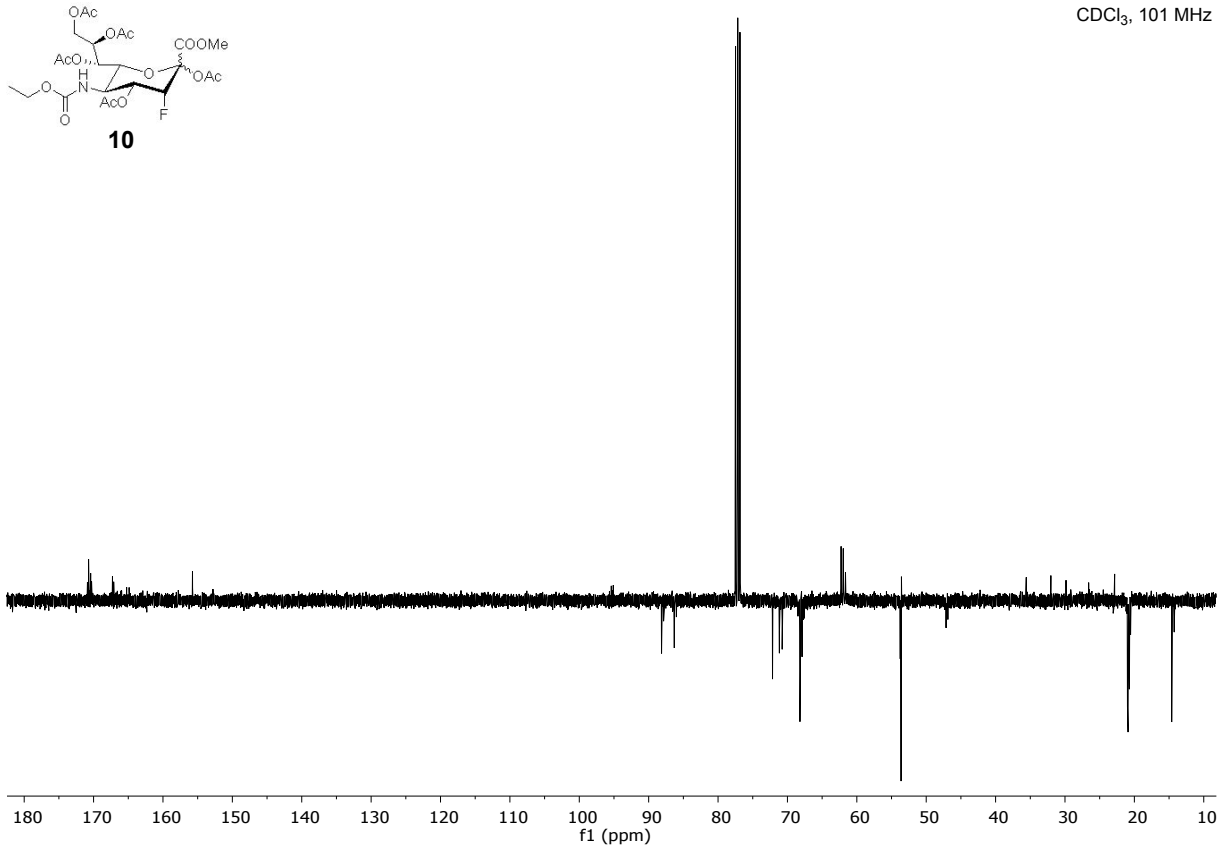



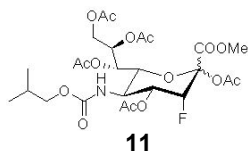

CDCl<sub>3</sub>, 400 MHz

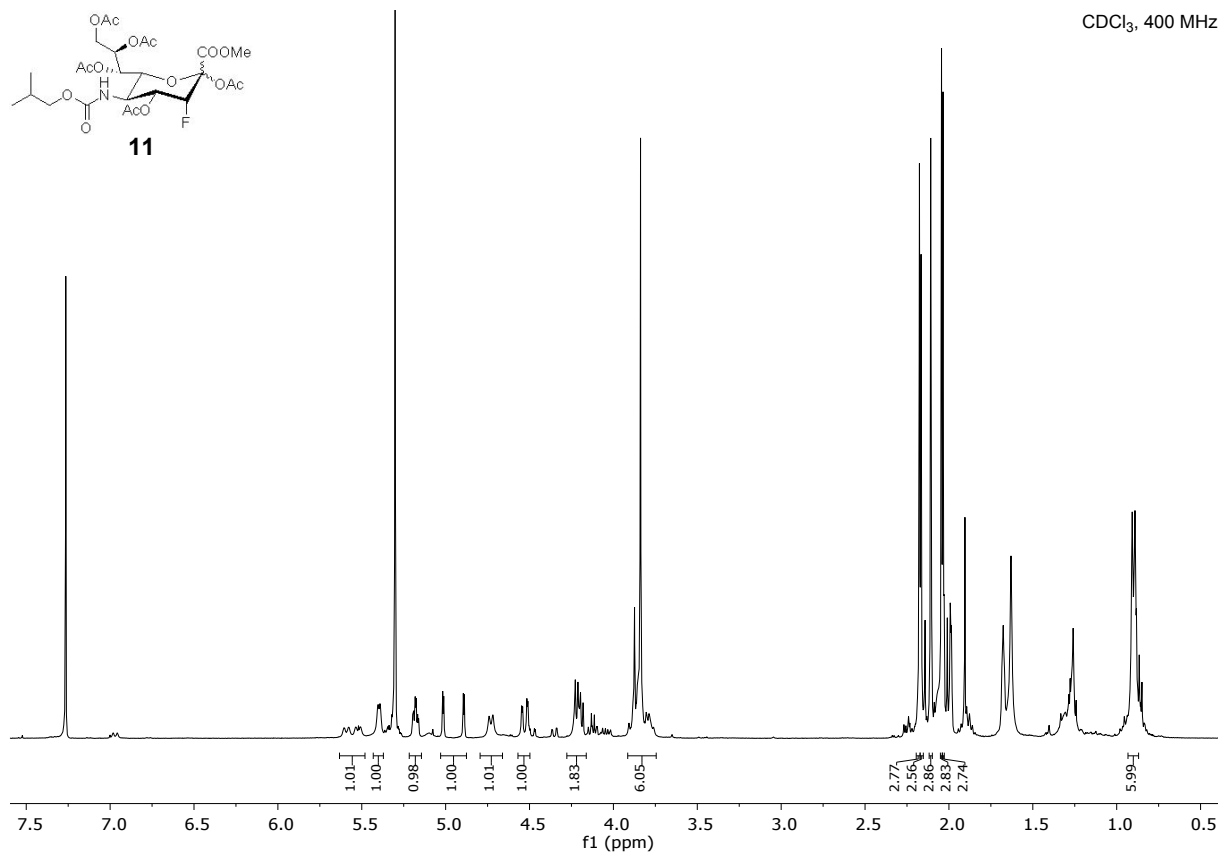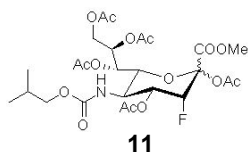

CDCl<sub>3</sub>, 101 MHz

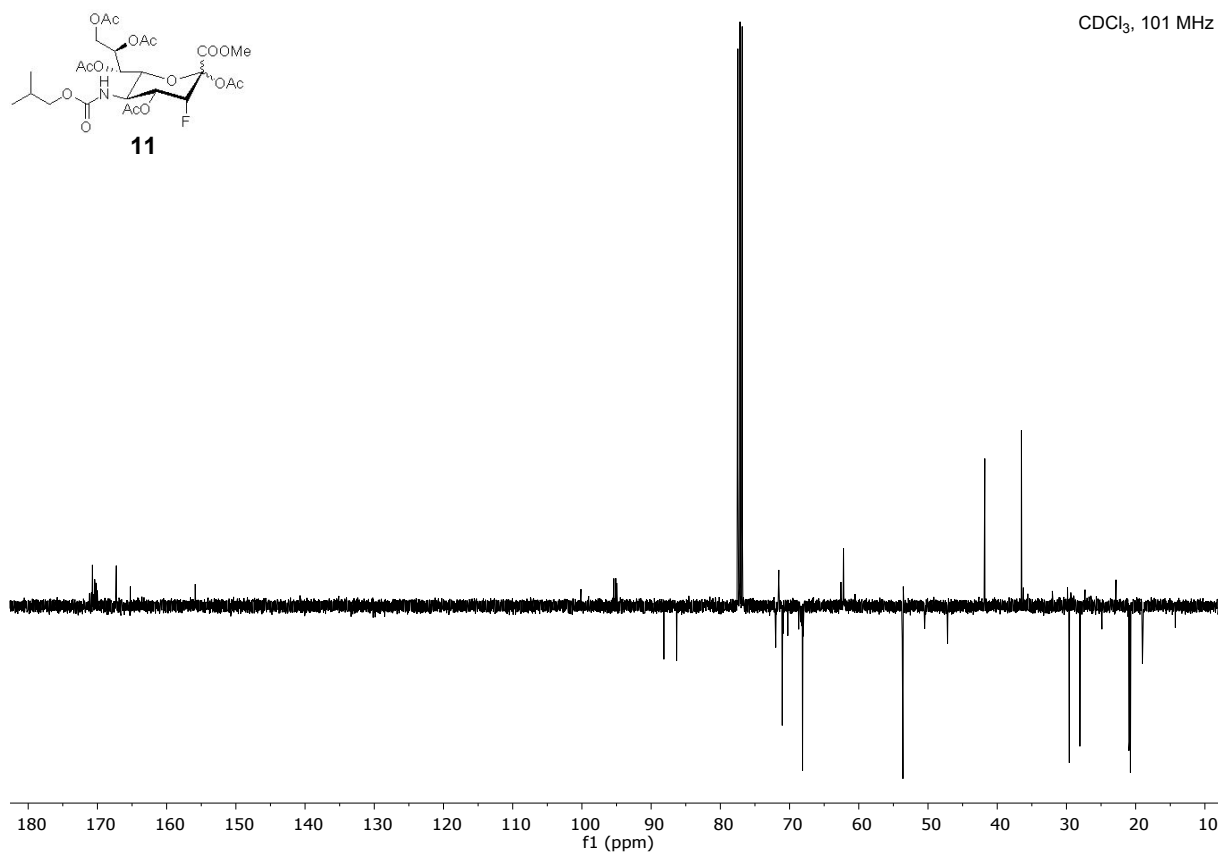

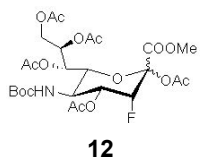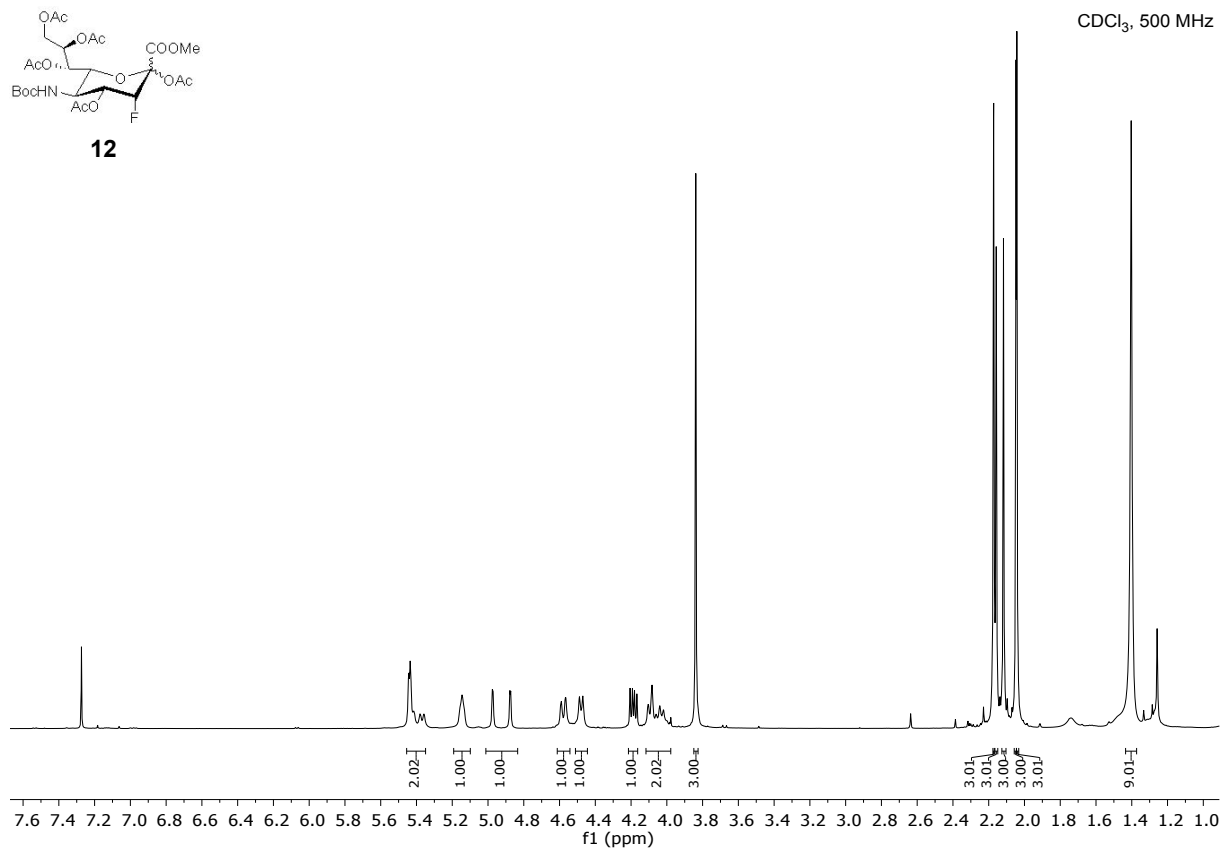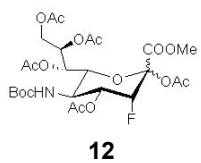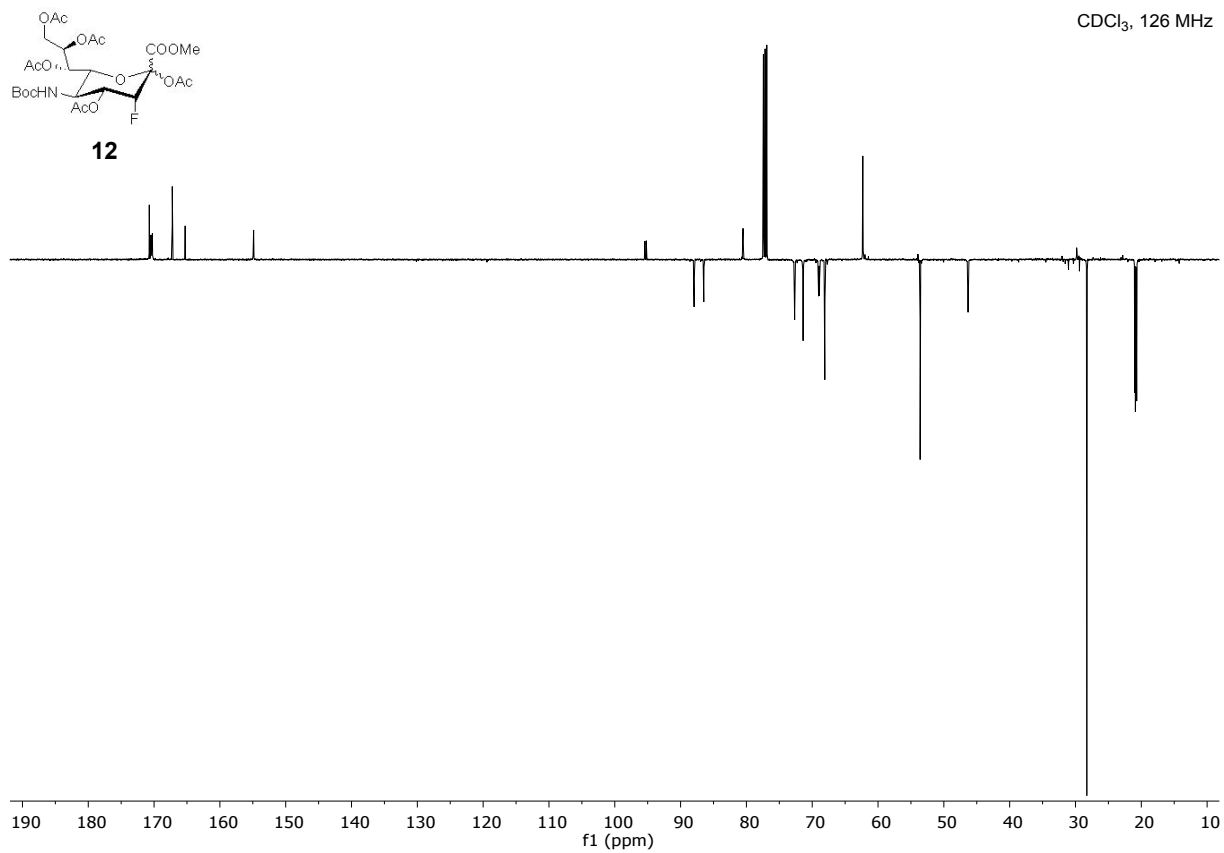

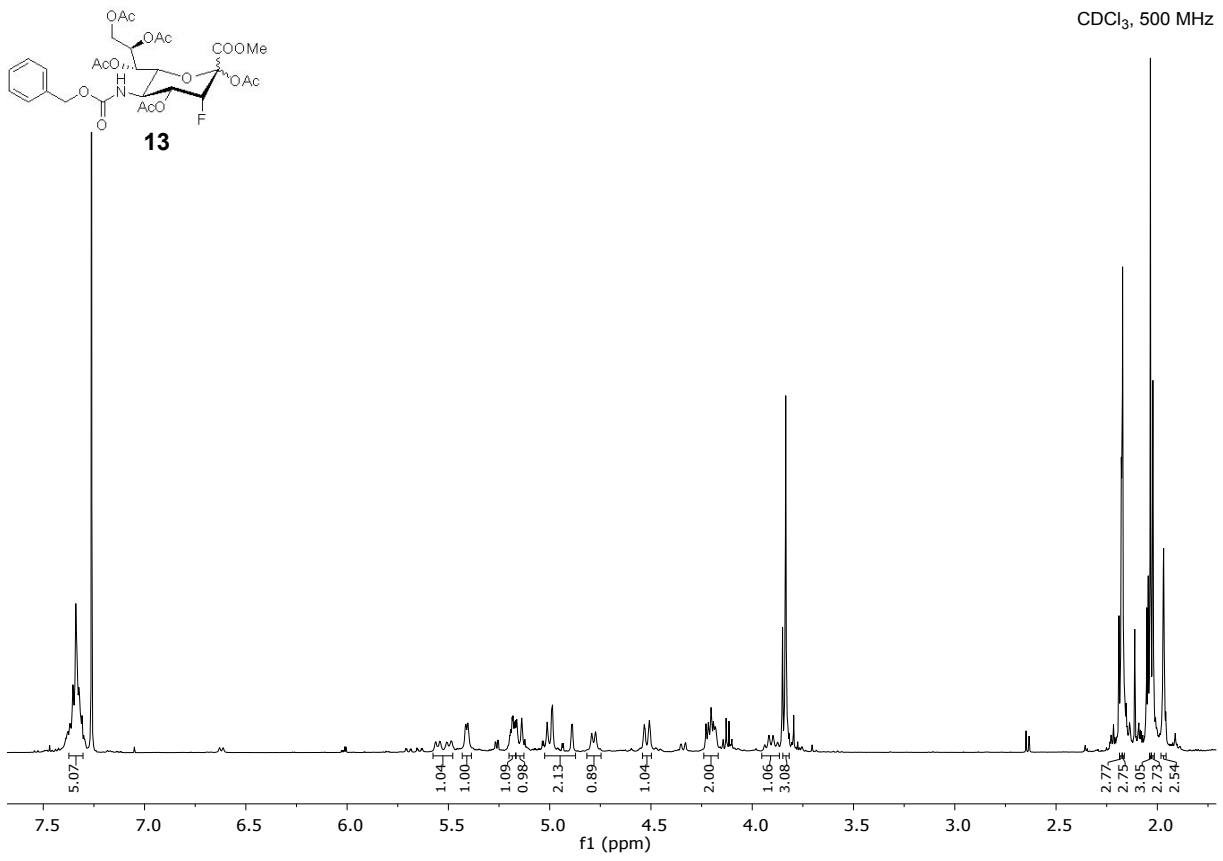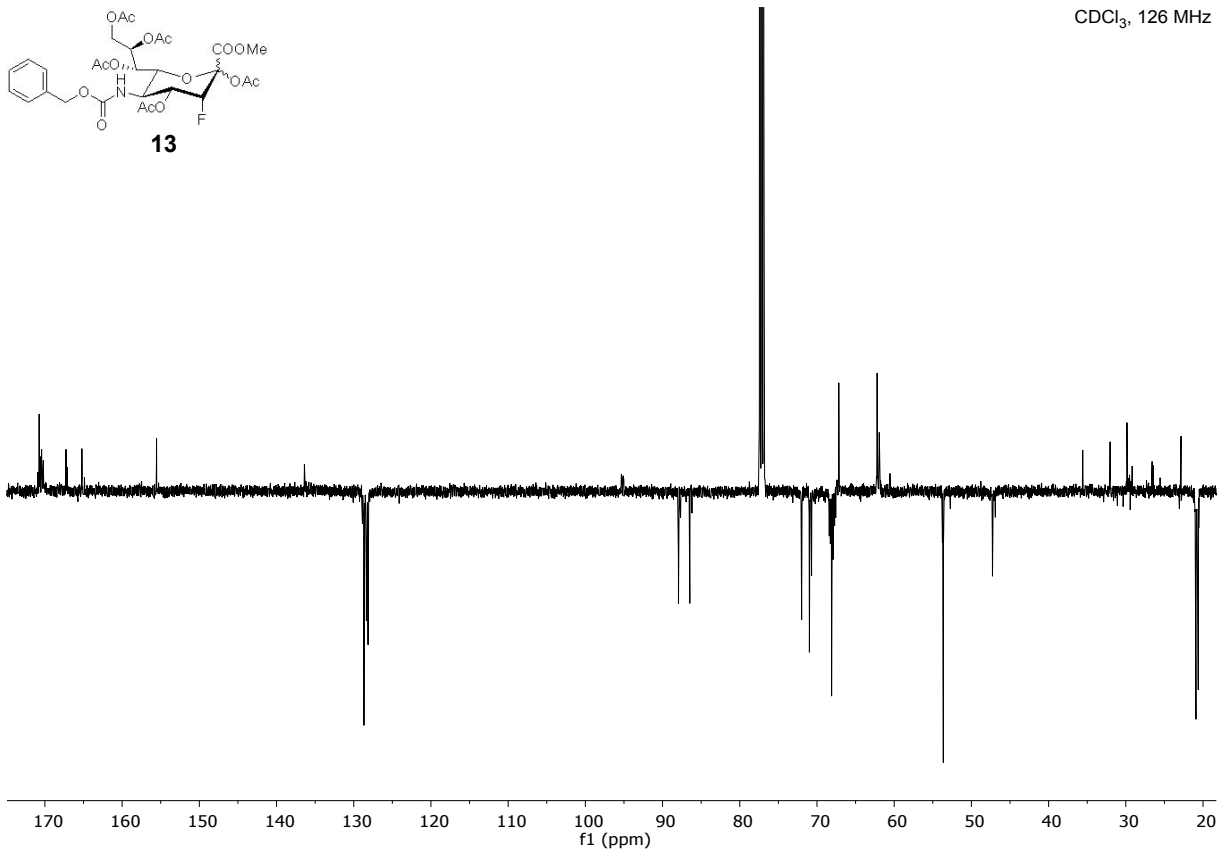

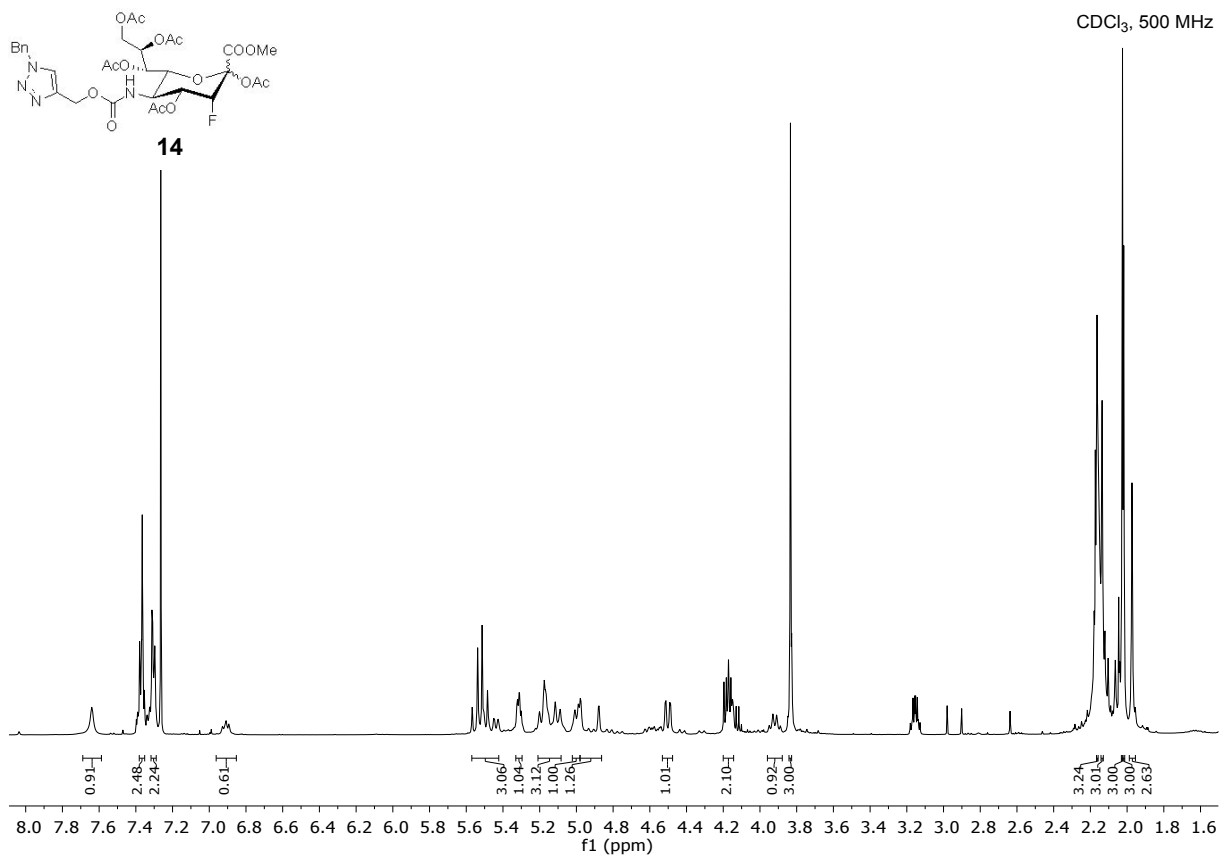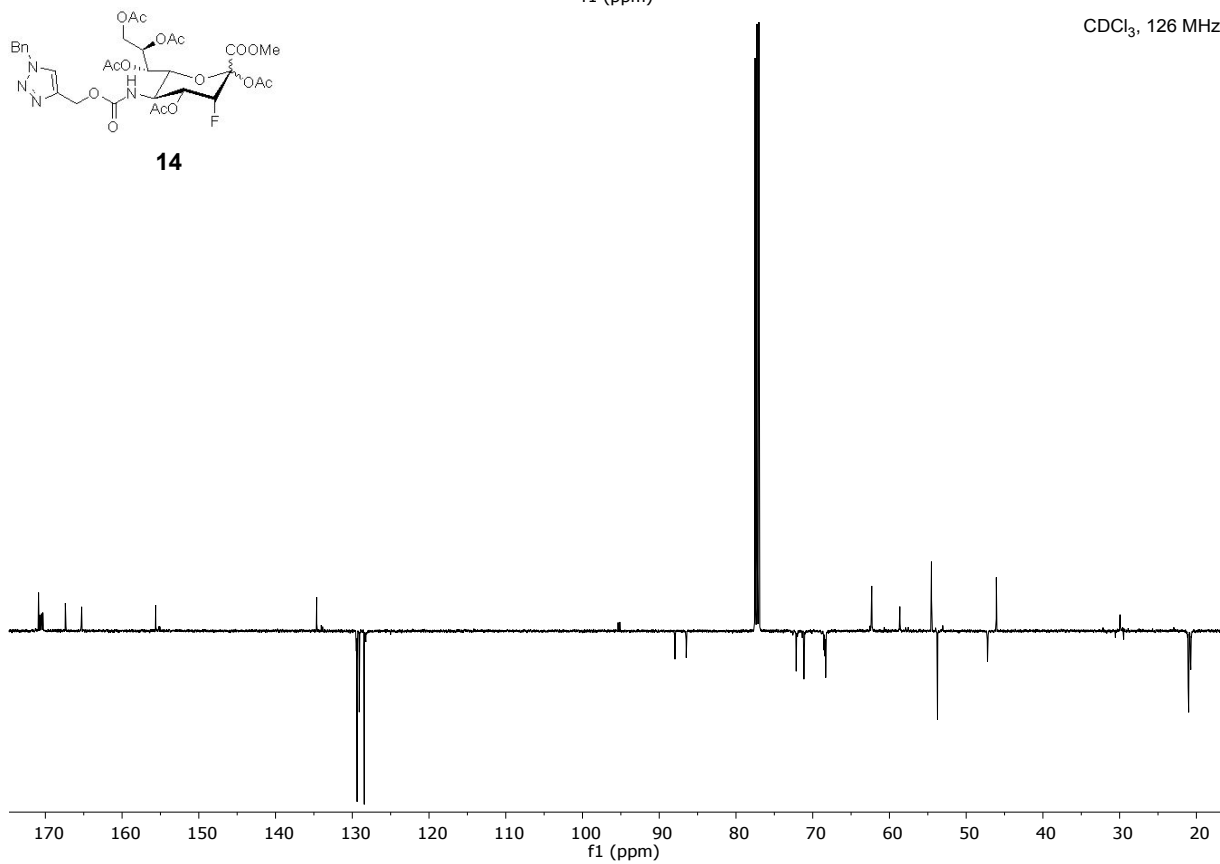

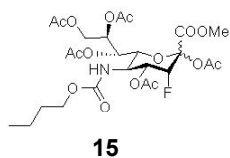

CDCl<sub>3</sub>, 500 MHz

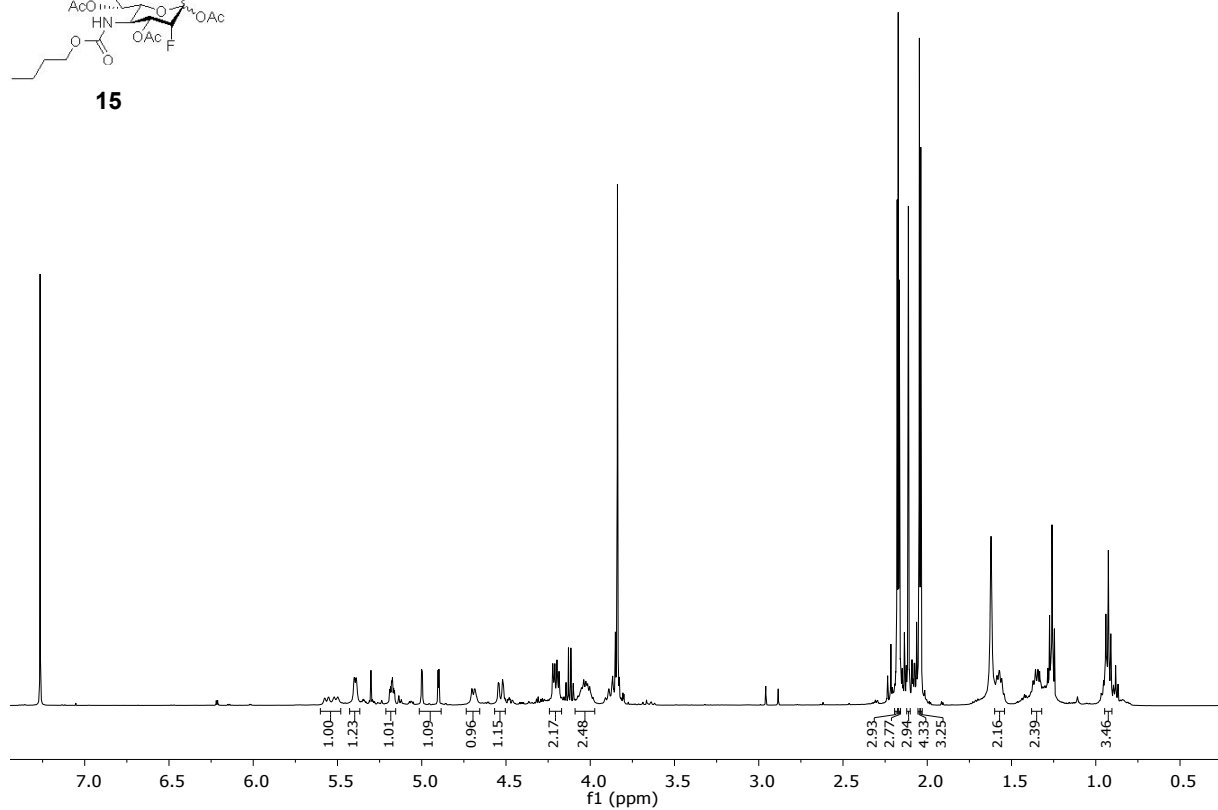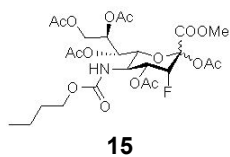

CDCl<sub>3</sub>, 126 MHz

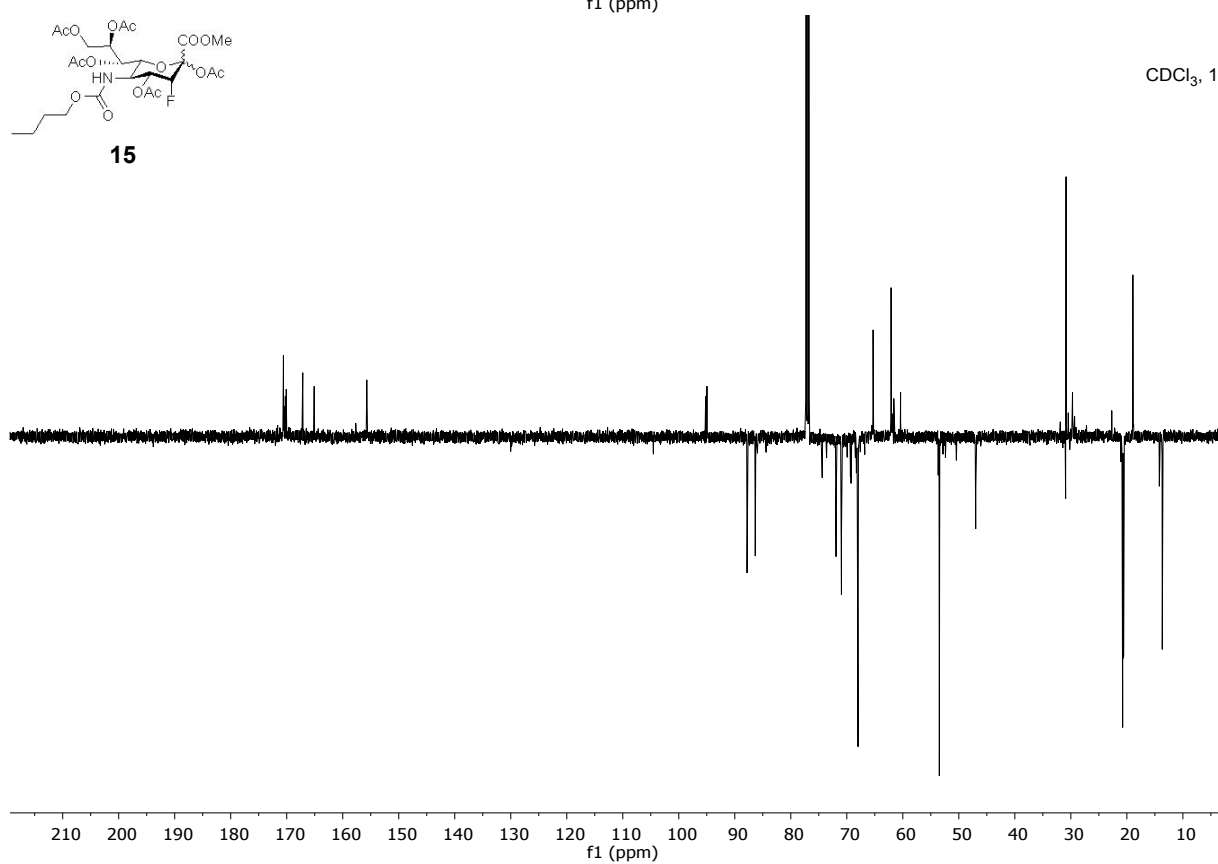

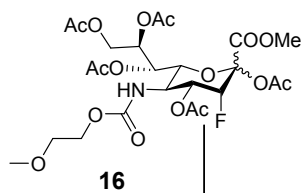

CDCl<sub>3</sub>, 500 MHz

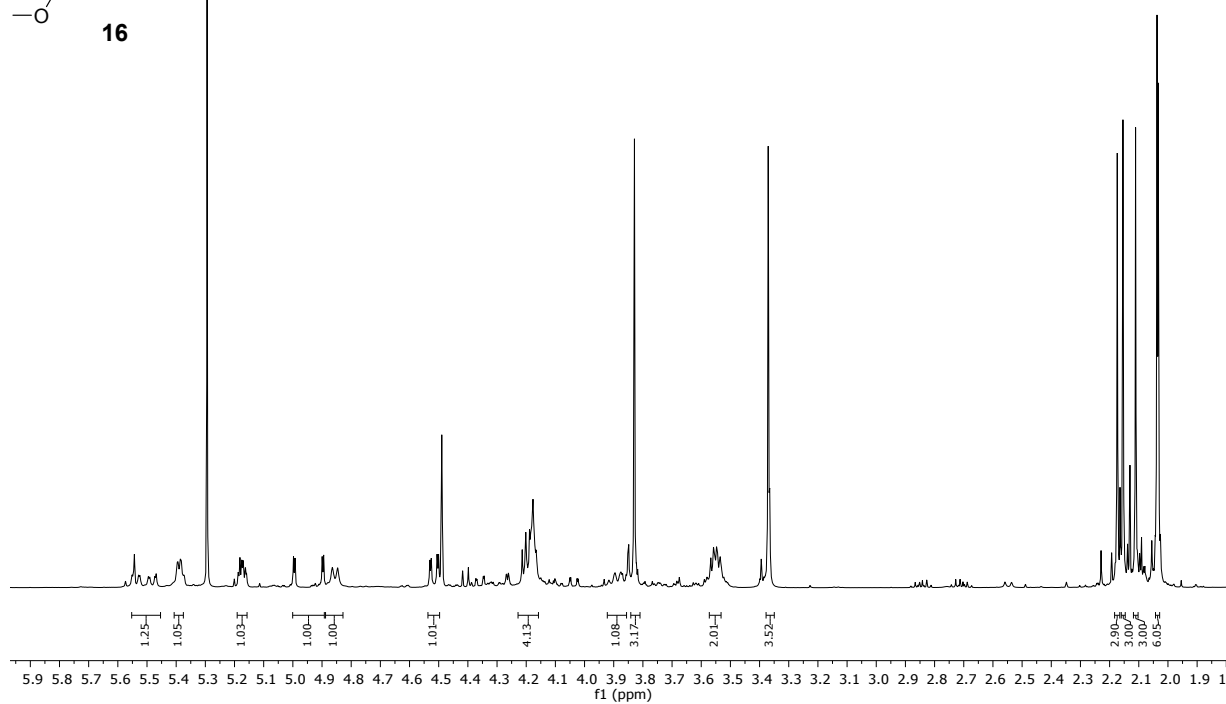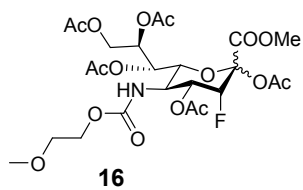

CDCl<sub>3</sub>, 126 MHz

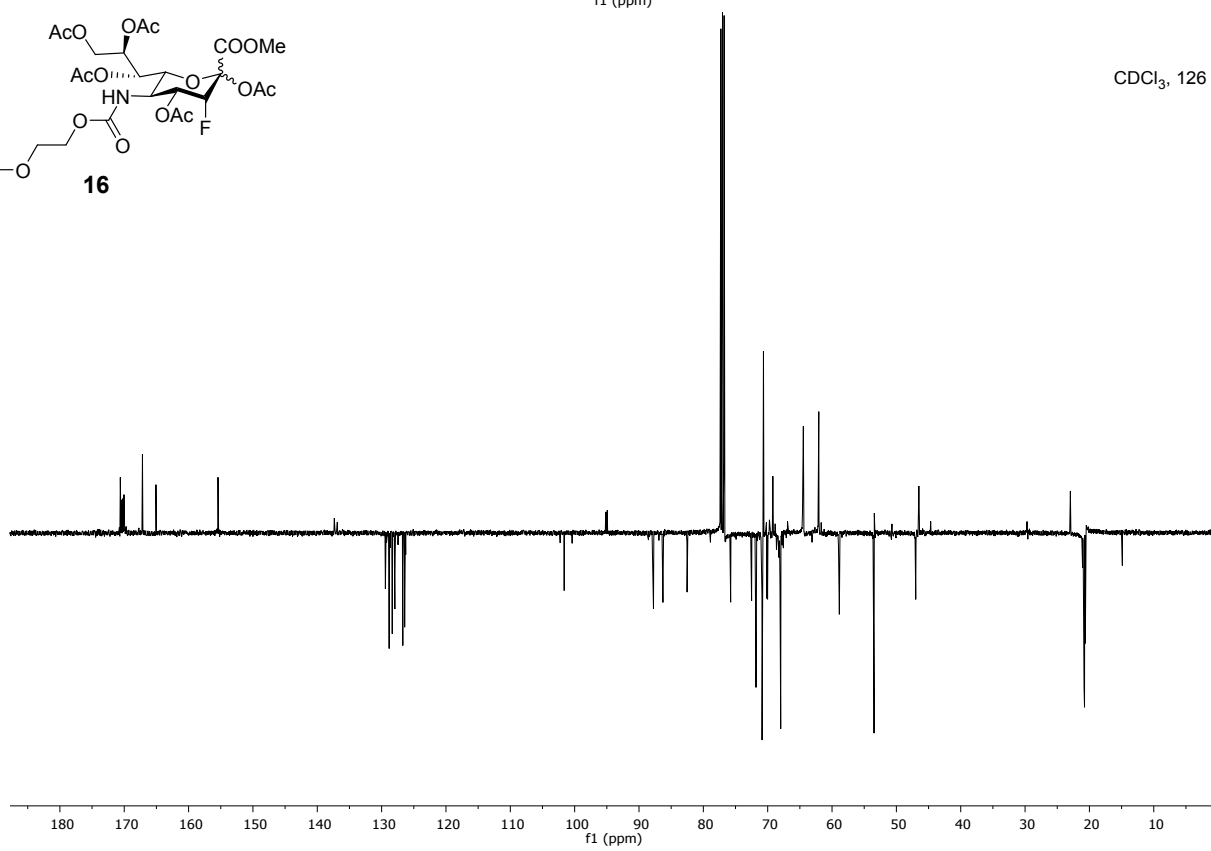

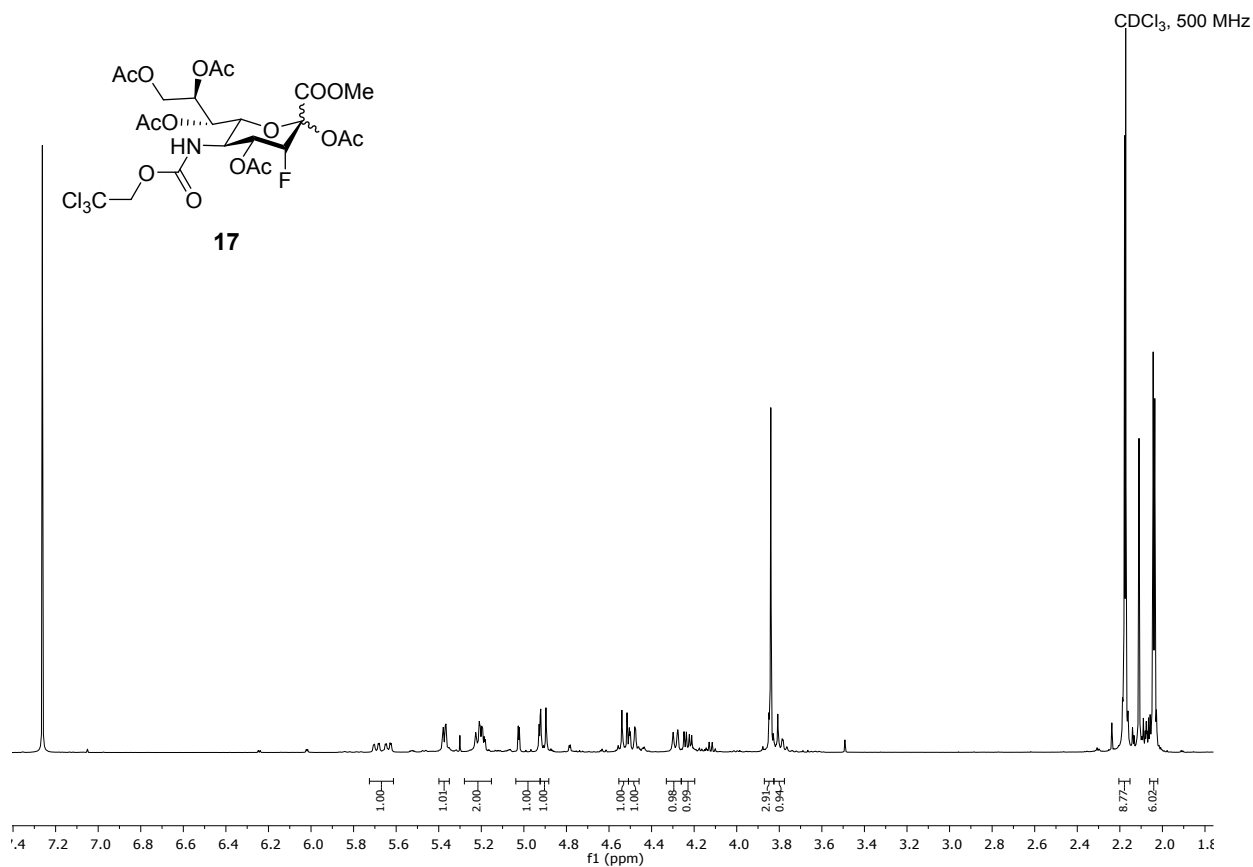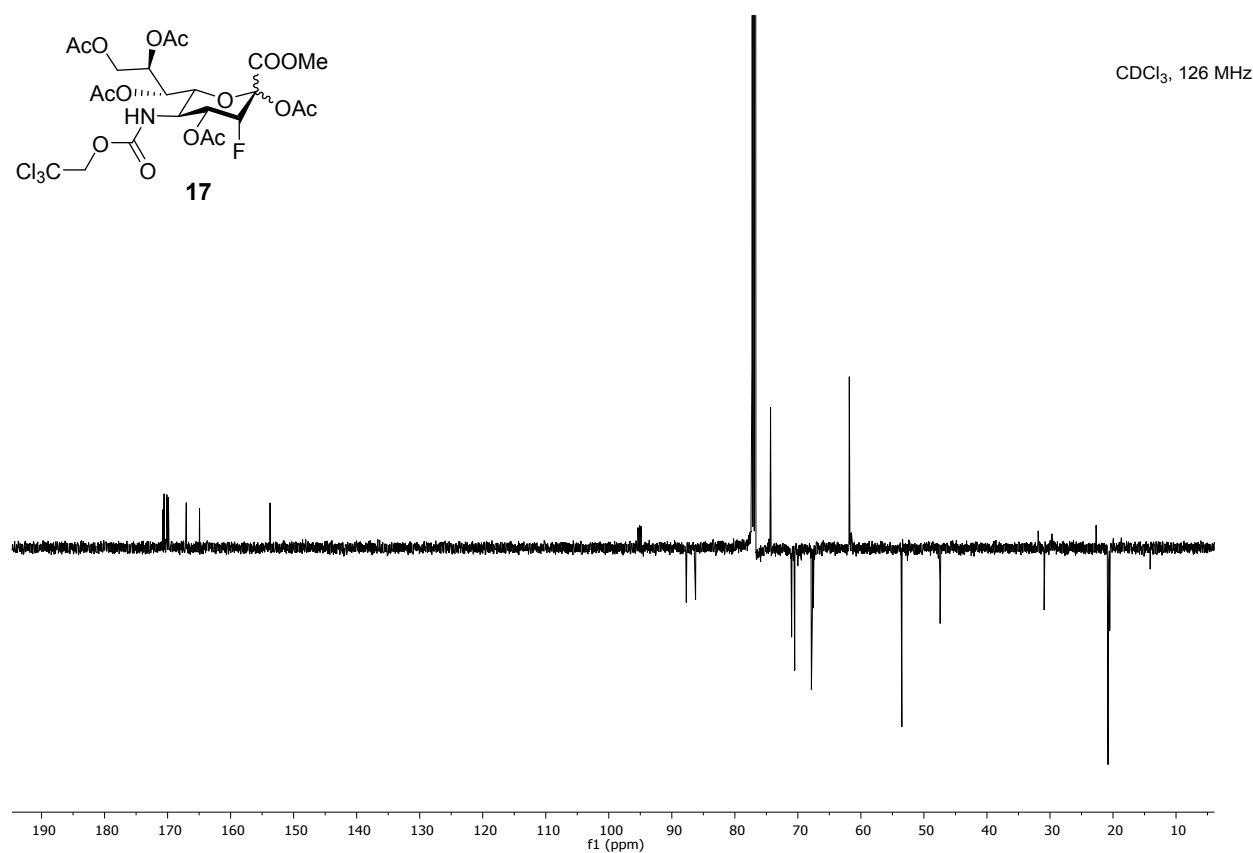

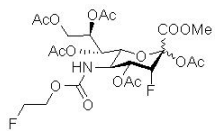

**18**

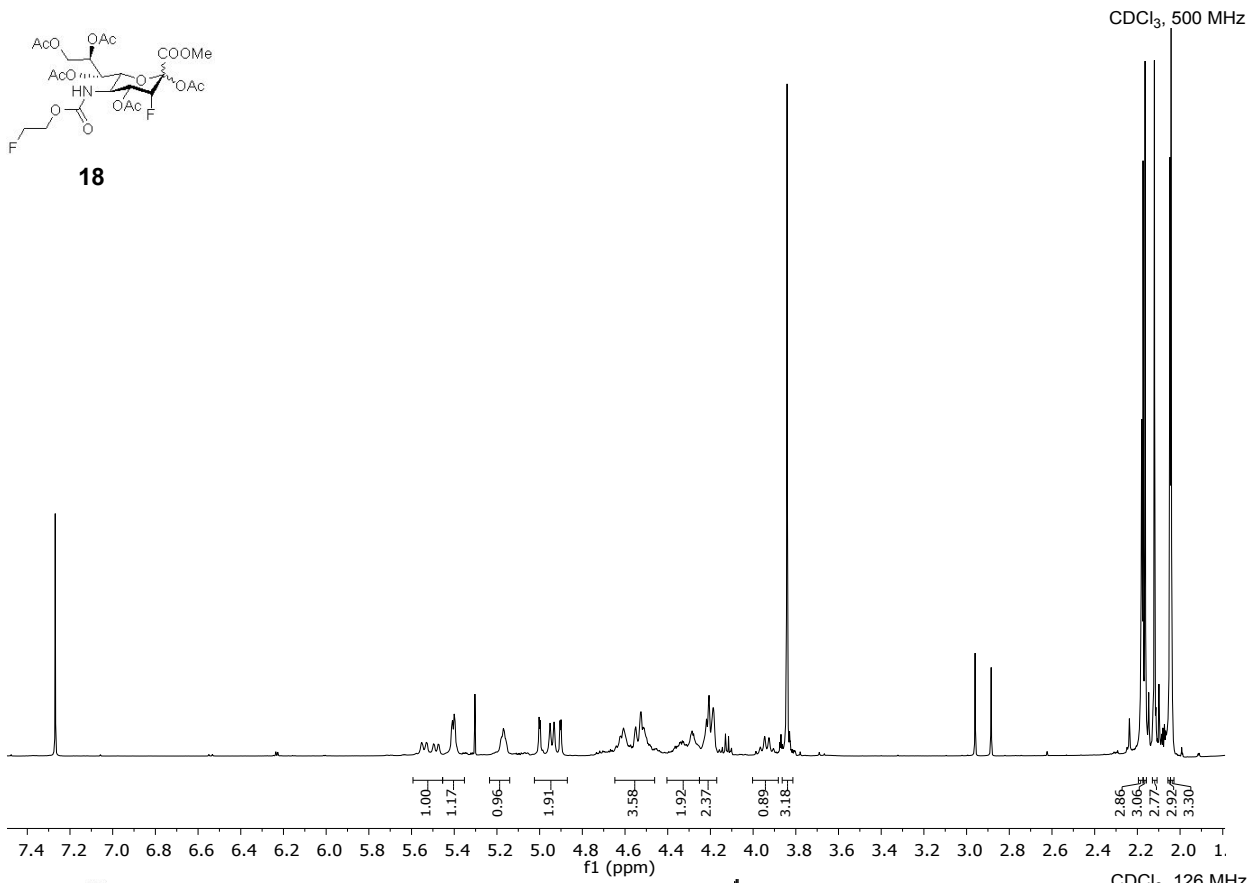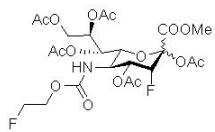

**18**

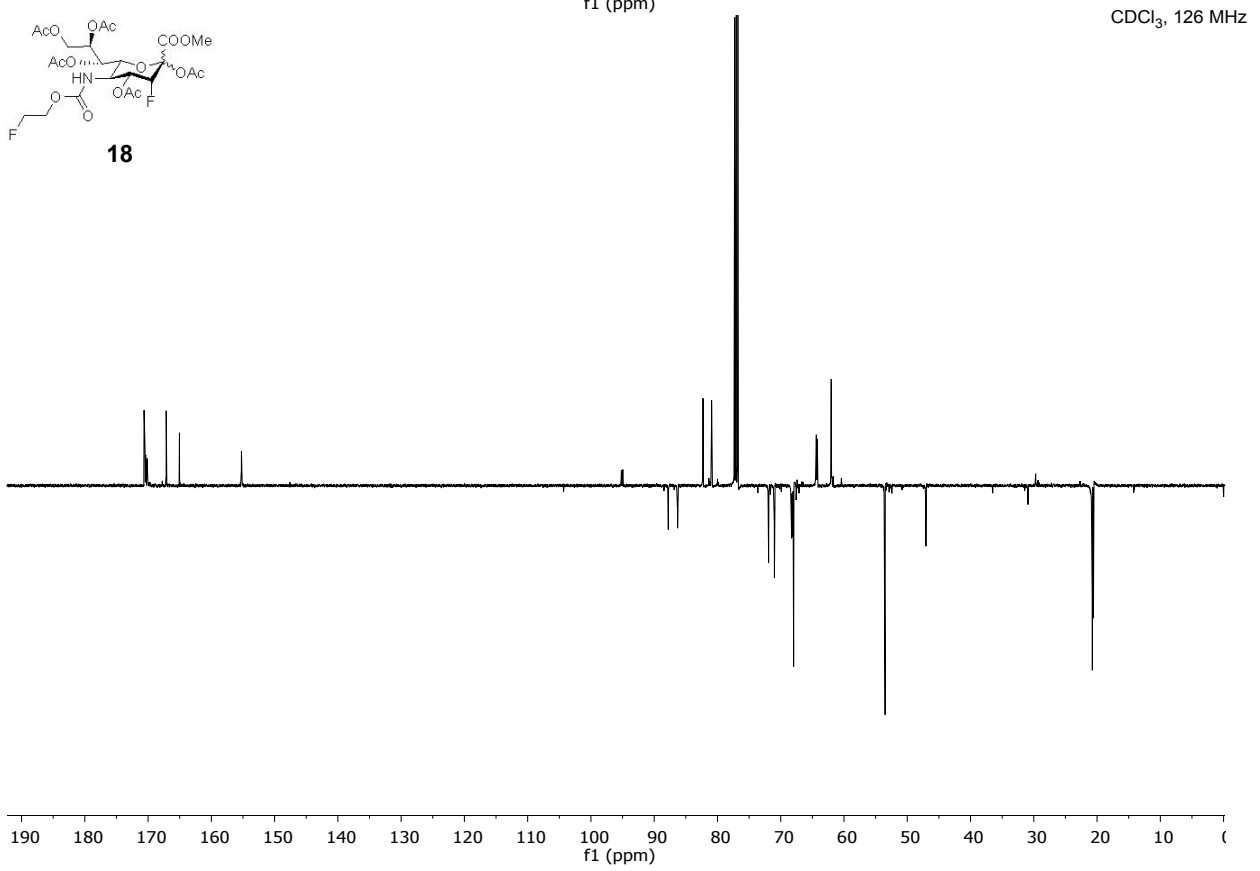



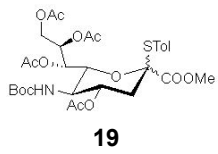

CDCl<sub>3</sub>, 500 MHz

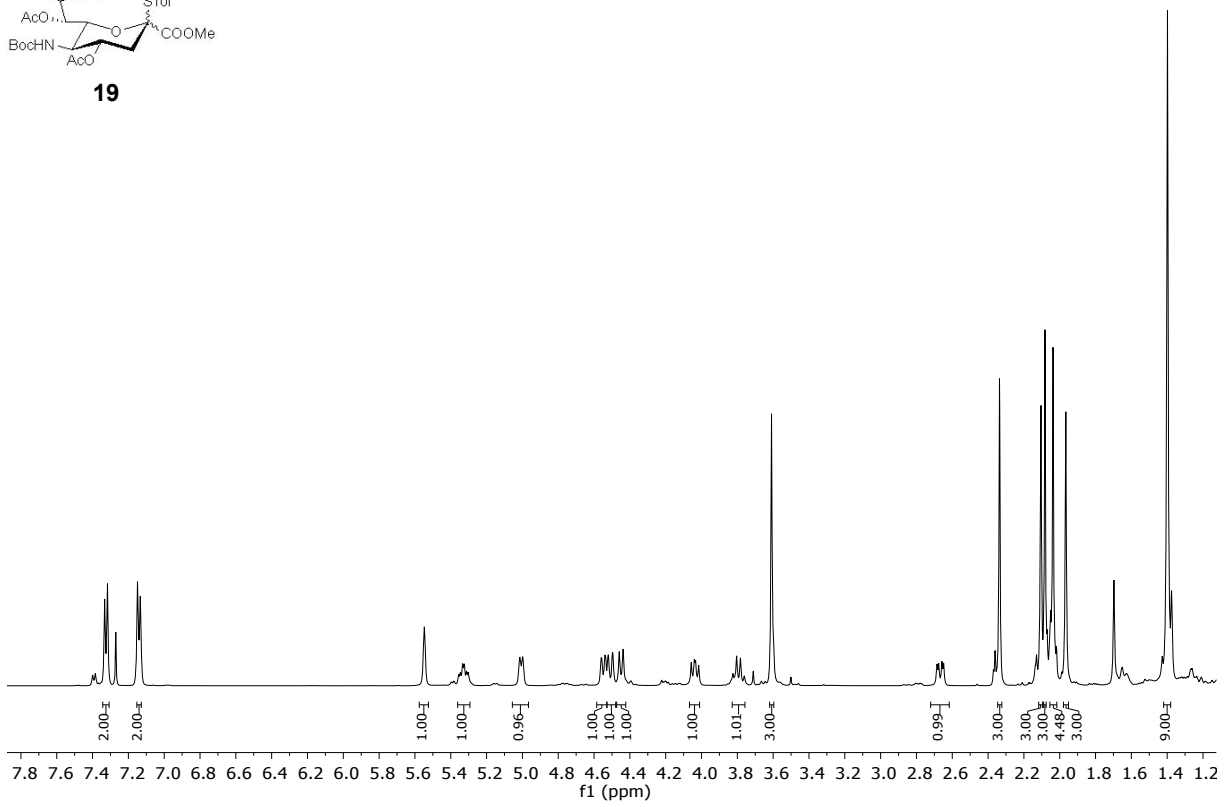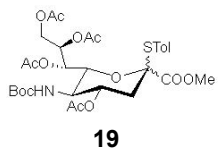

CDCl<sub>3</sub>, 126 MHz

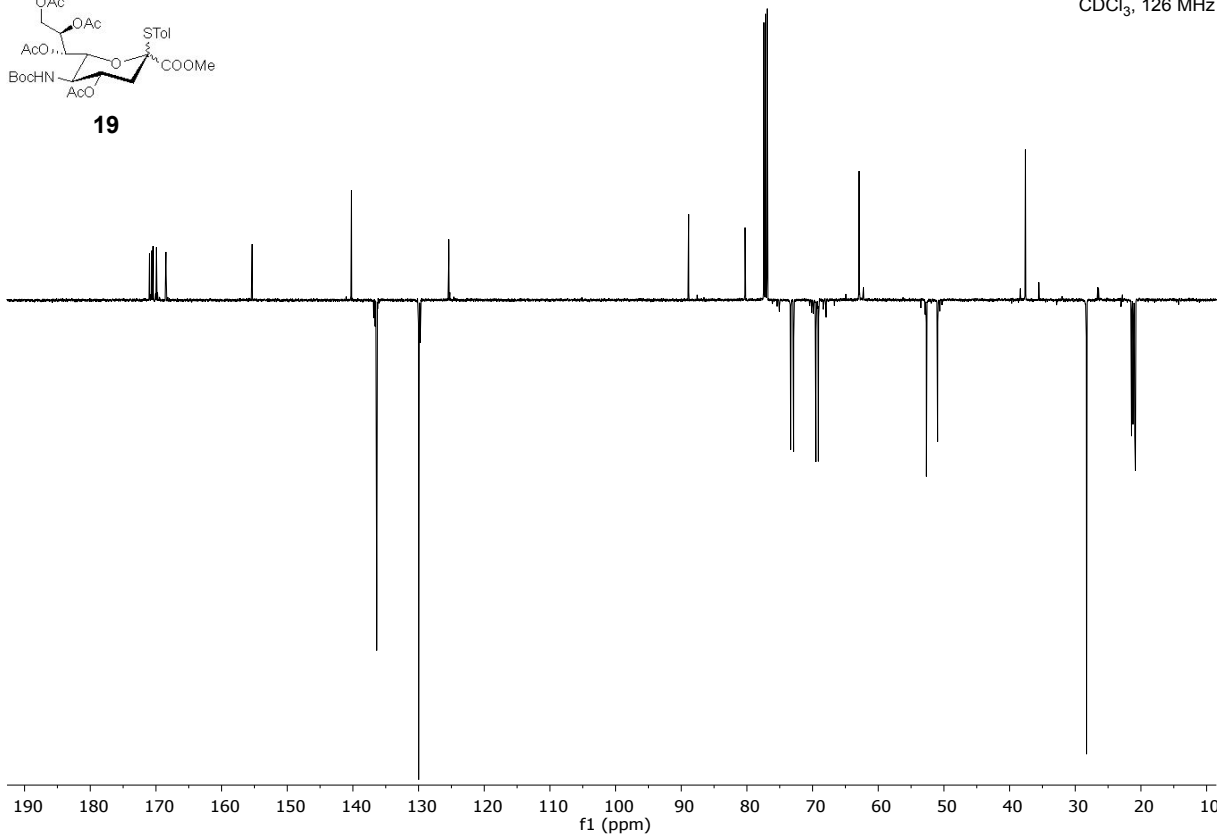

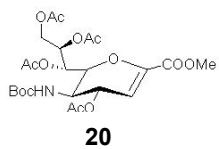

CDCl<sub>3</sub>, 500 MHz

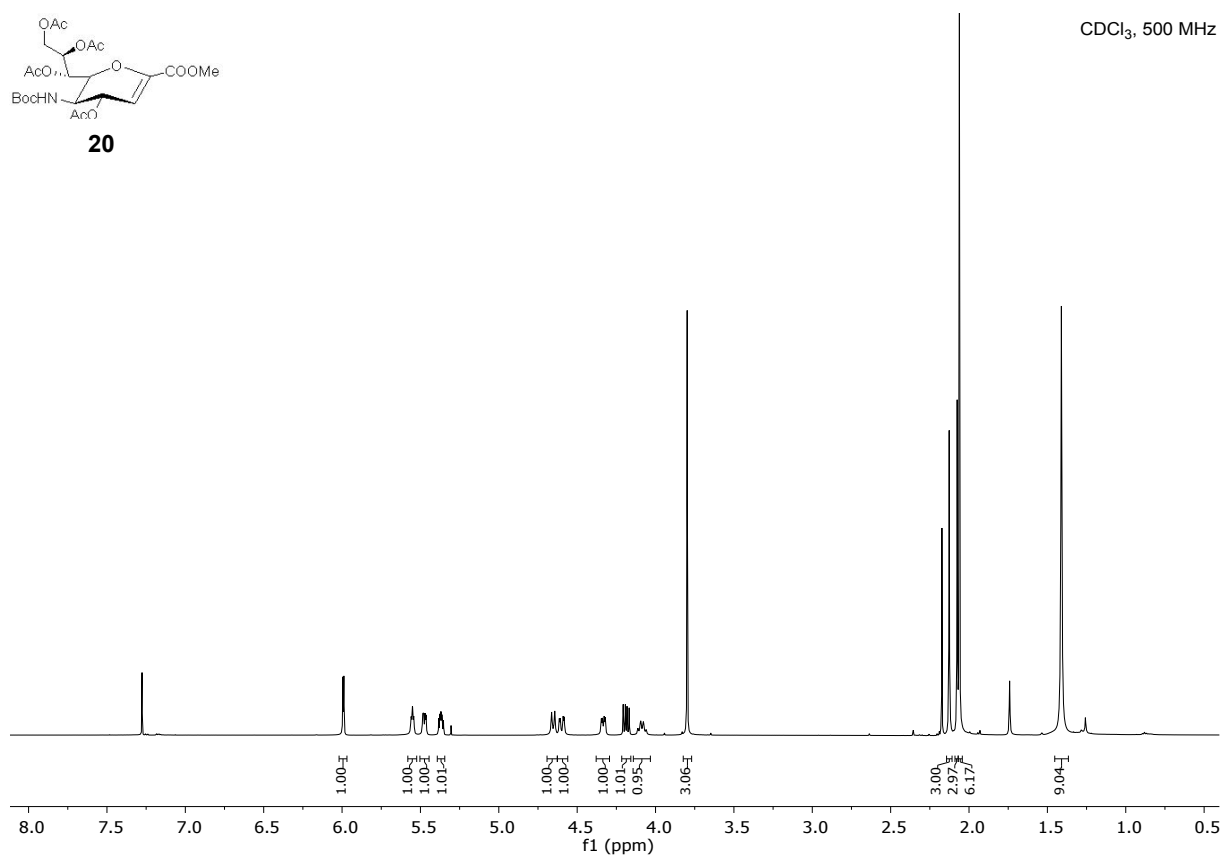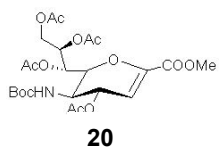

CDCl<sub>3</sub>, 126 MHz

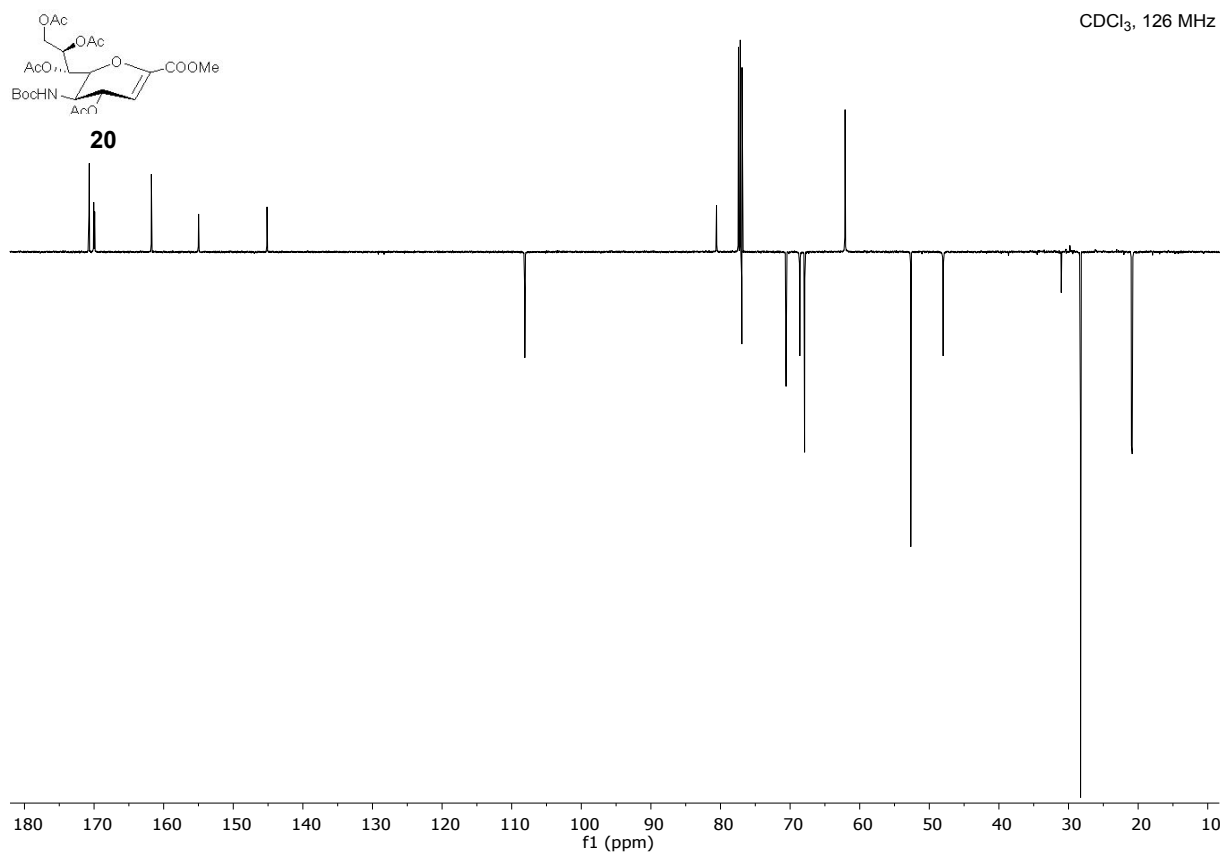

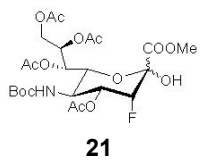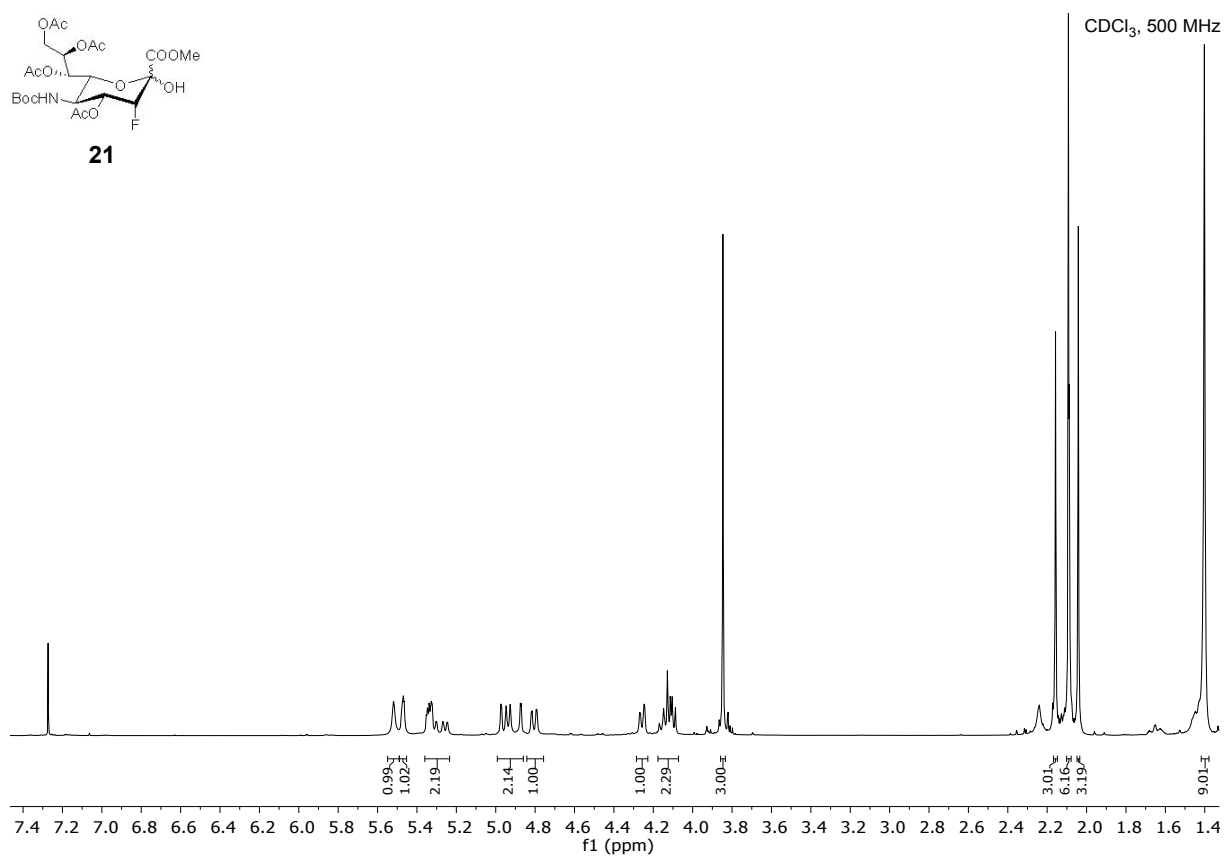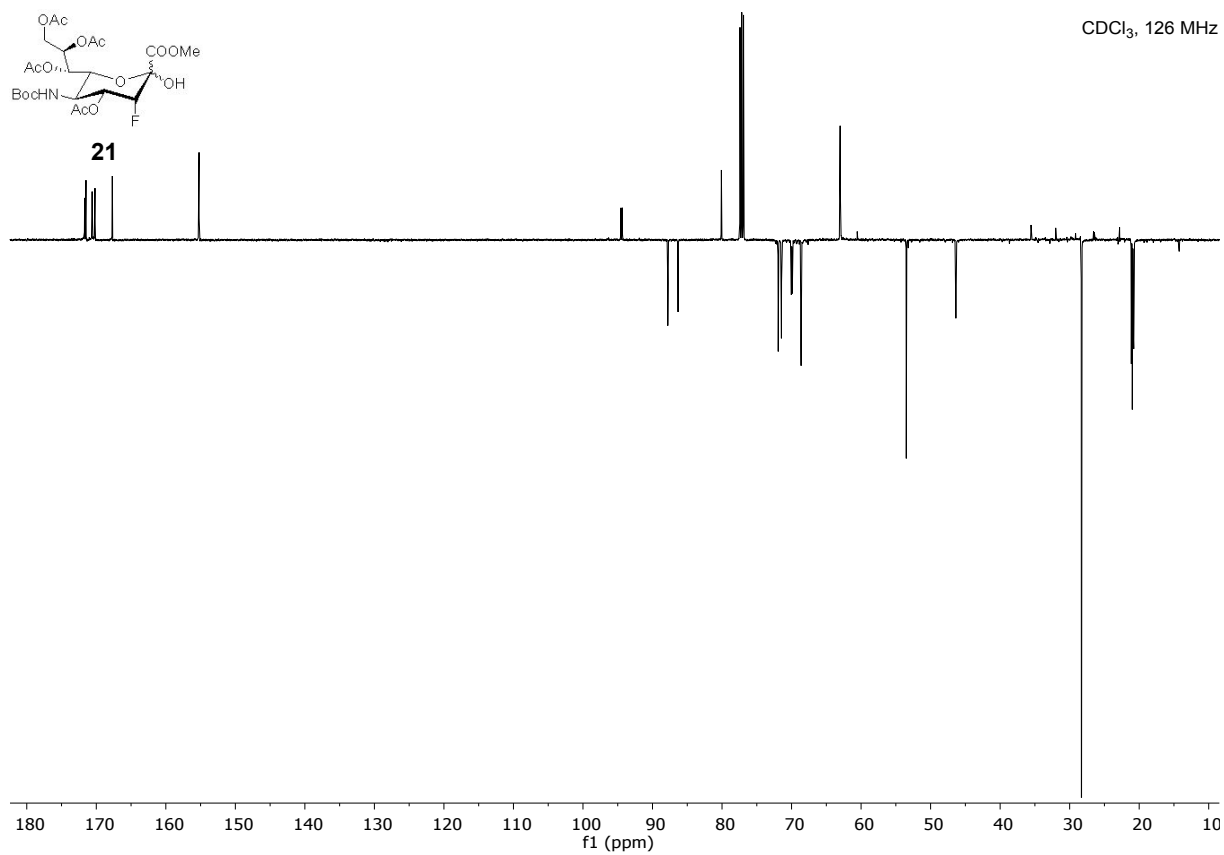

Supplement: jm8b01757_si_001.pdf [file jm8b01757_si_001.pdf]
